# Supplementary material for: Functional Overview on Mads Box: A Meta-Review
Source: Preprints.org preprint supplement (doi:10.20944/preprints202405.1691.v1), 2024-05-27
Supplement: Supplementary file 1 [file supplementary]

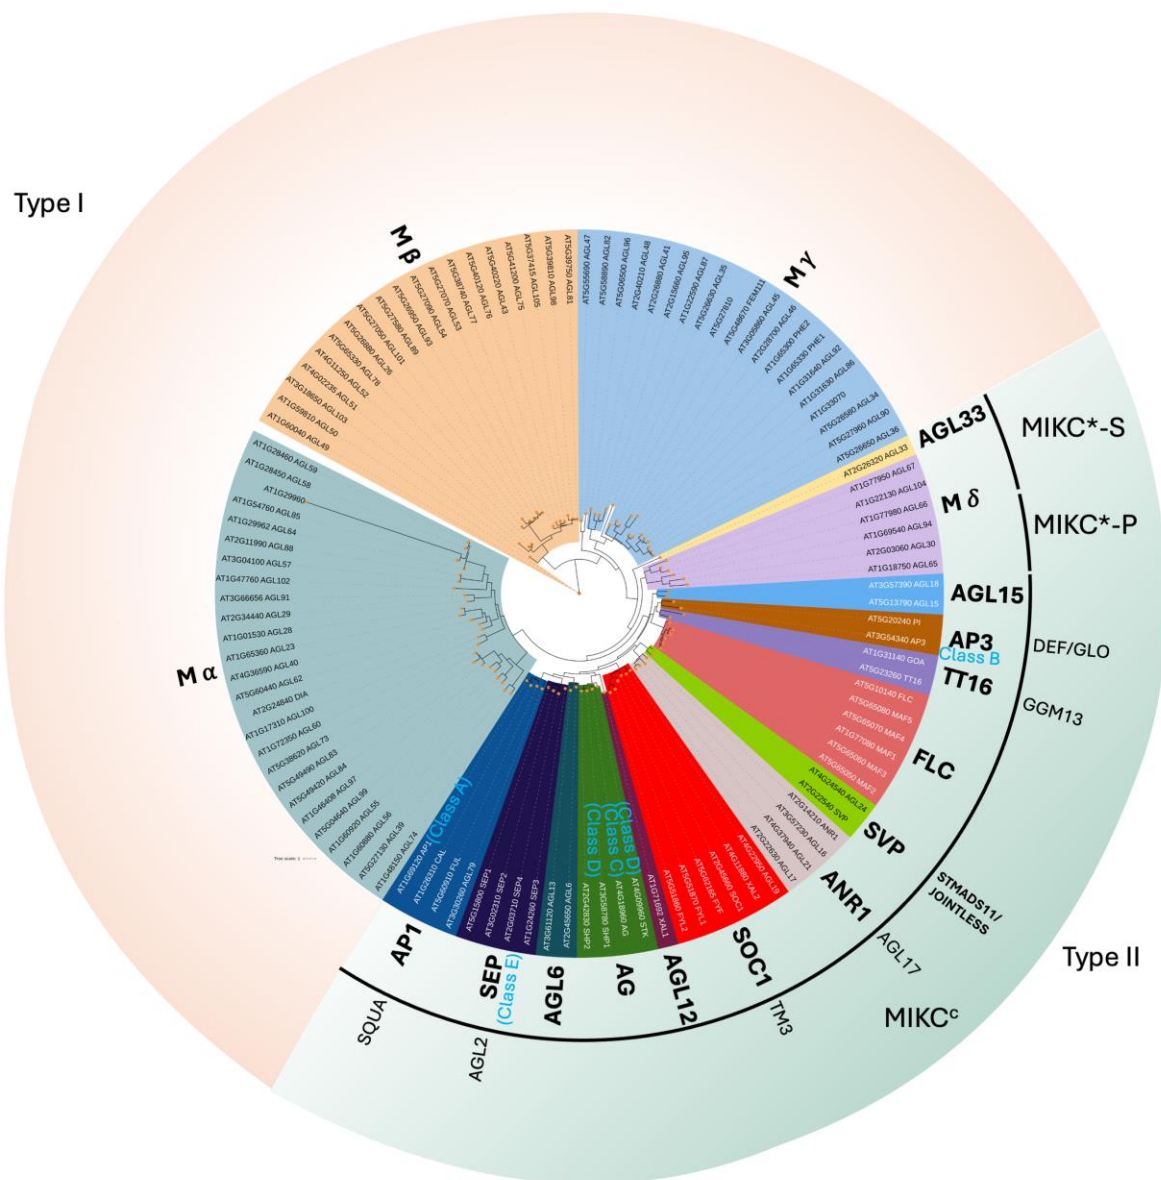

**Figure S1.** MADS box member TCOFFEE-alignment derived ML phylogeny. The clade IDs are based on earlier reports by Becker et al. (2003), Parnicova et al. (2003), Martinez-Castilla and Alvarez-Buylla (2003), and Nam et al. (2004).

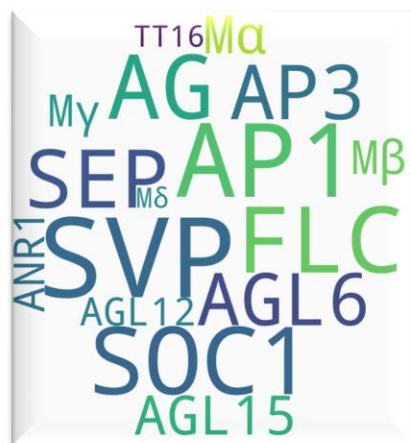

**Figure S2.** Gene clades-to-studies association with hits ranging from 6 (Mδ) to 76 (SVP)
