# Supplementary material for: Functional Overview on Mads Box: A Meta-Review
Source: Preprints.org preprint supplement (doi:10.20944/preprints202405.1691.v1), 2024-05-27
Supplement: Supplementary file 2 [file supplementary]

Archive with 4 entries (4 files):
- ijms-3051192  SM.pdf
- Supplementary Dataset 1.xlsm
- Supplementary Dataset 2.xlsx
- Table S1_MADS-box study associations.xlsx
