# Supplementary material for: Functional Overview on Mads Box: A Meta-Review
Source: Preprints.org preprint supplement (doi:10.20944/preprints202405.1691.v1), 2024-05-27
Supplement: Supplementary file 2 [file supplementary › Supplementary Dataset 1.xlsm]

## Sheet: Studied organisms
Organisms	Study frequency
arabidopsis	363
rice	65
tomato	61
orchid	33
wheat	28
apple	25
tobacco	24
maize	22
petunia	20
antirrhinum	20
peach	18
soybean	17
barley	16
populus	14
grapes	12
pear	12
pyrus	12
potato	10
antirrhinum majus	9
cymbidium	8
cotton	8
chrysanthemum	8
strawberry	8
apricot	7
rapeseed	7
phalaenopsis	6
banana	6
ferns	6
physcomitrella	5
cherry	5
papaya	5
ipomoea	5
kiwifruit	5
loquat	5
algae	5
camellia	5
ginkgo biloba	5
fragaria	5
bamboo	4
picea abies	4
iris	4
citrus	4
brassica napus	4
birch	4
betula	4
pea	4
elaeis	4
oil palm	4
bryophytes	4
walnut	4
isatis indigotica	4
prunus mume	4
bean	3
silene latifolia	3
gnetum	3
gerbera	3
spruce	3
pineapple	3
lolium perenne	3
passiflora	3
sweet potato	3
rubber	3
juglans	3
lotus	3
nelumbo nucifera	3
actinidia	3
medicago	3
ryegrass	3
blueberry	3
selaginella	2
millet	2
carrot	2
saffron	2
crocus sativus	2
prunus salicina	2
physalis	2
leafy spurge	2
pakchoi	2
eriobotrya japonica	2
chickpea	2
epimedium sagittatum	2
erycina pusilla	2
rose	2
chicory	2
arabis	2
cucumber	2
eustoma	2
setaria	2
marigold	2
polypogon fugax	2
spinach	1
lycophytes	1
agave	1
cannabis	1
clematis courtoisii	1
eggplant	1
pepper	1
lycoris radiata	1
chayote	1
nigella damascena	1
passiflora organensis	1
edamame	1
sugarcane	1
zanthoxylum bungeanum	1
aethionema	1
cowpea	1
sagittaria sagittifolia	1
korthalsia laciniosa	1
ecodormant poplars	1
physalis floridana	1
litchi	1
coffee	1
lettuce	1
white campion	1
ceropegia sandersonii	1
dryopteris fragrans	1
bilberry	1
miscanthus	1
switchgrass	1
sheepgrass	1
pigeonpea	1
fig	1
magnolia wufengensis	1
davidia involucrata	1
nuphar pumila	1
viola philippica	1
perilla frutescens	1
akebia	1
hemerocallis fulva	1
argan tree	1
tulips	1
senecio vulgaris	1
morus notabilis	1
pine	1
diospyros oleifera	1
olive	1
thalictrum	1
tropaeolum	1
ganoderma lucidum	1
sinapis alba	1
bletilla striata	1
jatropha curcas	1
mango	1
catharanthus roseus	1
water lilies	1
japanese gentian	1
alfalfa	1
microalga	1
groundnut	1
aristolochia fimbriata	1
paulownia kawakamii	1
streptochaeta angustifolia	1
senecio cruentus	1
sclerotinia sclerotiorum	1
coffea canephora	1
rafflesia cantleyi	1
pumpkin	1
adonis amurensis	1
nepenthes	1
amphicarpaea edgeworthii	1
eucalyptus	1
poncirus	1
gentiana	1
canna	1
brassica juncea	1
chestnut	1
longan	1
cunninghamia lanceolata	1
acacia mangium	1
tall fescue	1
brassica oleracea	1
triticum petropavlovskyi	1
malus hupehensis	1
dandelion	1
taraxacum	1
jasmine	1
buckwheat	1
lentil	1
hypericum	1
poppy	1
rhododendron	1
carnation	1
lumnitzera littorea	1
zizania latifolia	1
redwood	1
punica granatum	1
saururus	1
magnaporthe oryzae	1

## Sheet: Studied MADS box IDs
MADS box genes	Study frequency
SVP	76
AP1	70
SOC1	54
FLC	52
AG	48
FUL	47
AP3	39
SEP3	37
AGL6	33
PI	31
SEP1	30
STK	27
AGL24	27
AGL15	26
AGL17	18
ANR1	16
SHP2	15
XAL1	15
MAF1	14
SHP1	13
SEP2	12
TT16	11
AGL21	10
MAF4	10
MAF2	9
AGL19	9
AGL16	9
MAF5	9
FYF	9
AGL62	8
AGL18	7
MAF3	7
XAL2	6
SEP4	6
PHE1	5
GOA	5
AGL79	5
AGL13	4
CAL	4
FEM111	2
DIA	2
AGL23	2
AGL34	1
AGL35	1
FYL1	1
FYL2	1
AGL26	1
AGL56	1
AGL91	1
AGL40	1
AGL50	1
AGL36	1
AGL90	1
AGL66	1
AGL104	1
AGL28	1

## Sheet: Studied cross spp MADS box IDs
MADS box genes	Study frequency
STMADS11	12
VRN1	10
TAGL1	7
OsMADS1	7
TM6	6
OsMADS57	5
MADS1	5
MADS6	4
STMADS16	4
SlMADS1	4
OsMADS13	4
PpDAM1	4
OsMADS32	4
OsMADS58	4
SlMADS	3
OsMADS14	3
SlMBP3	3
MdFLC	3
OsMADS29	3
PpMADS13	3
OsMADS23	3
AtFLC	3
VviAGL11	3
OsMADS27	3
OsMADS25	3
euAP3	2
OsMADS87	2
GmAGL1	2
LpMADS1	2
LpMADS10	2
DOSOC1	2
LOFSEP	2
LeMADS	2
BpMADS4	2
OsMADS18	2
CsSVP	2
PpMADS2	2
OsMADS3	2
SlAGL11	2
TAG1	2
AtAP3	2
BcAP3	2
OsMADS15	2
OsMADS68	2
OsMADS	2
OsMADS34	2
HvMADS58	2
MdDAMs	2
OsMADS26	2
FaSOC1	2
MADS2	2
CsSEP4	2
CsAP3	2
CsSOC1	2
MuMADS1	2
MADS68	2
HkSVP	2
AtANR1	2
PeMADS3	2
PeMADS2	2
AtSOC1	2
IiSEP2	2
IiSEP4	2
ZAG1	2
AtSVP	2
MdDAMa	2
MdDAMb	2
MdDAMc	2
euAG	2
MADS17	2
MADS13	2
OsMADS5	2
OsMADS61	2
DAM3	2
HvMADS	2
HvMADS16	2
euFUL	2
OsMADS56	2
VcSOC1K1	2
ZmSOC1	2
CmANR1	2
PeMADS	2
VvAGAMOUS	2
VvMADS5	2
PpDAM6	2
GbMADS	2
PmDAM6	2
PmDAMs	2
PmDAM1	2
PhaMADS7	1
SmMADS1	1
SmMADS3	1
SmMADS6	1
PvAGL	1
PvFUL	1
TaAGL14	1
PpAP1	1
PpAP3	1
PpSEP3	1
PavDAMs	1
PavDAM1	1
PavDAM4	1
PavDAM5	1
PavDAM	1
VFUL	1
VAP1	1
OMADS5	1
OMADS3	1
OMADS9	1
OMADS8	1
VvMADS	1
GMADS	1
SmMADS	1
CaMADS	1
PeMADS1	1
PeMADS7	1
PhSEP1	1
PhSEP2	1
PhSEP3	1
PhSEP	1
PhSEPs	1
SeMADS	1
SeMADS06	1
SeMADS13	1
SeMADS26	1
SeMADS28	1
SeMADS36	1
SeMADS37	1
SeMADS03	1
SeMADS52	1
SeMADS21	1
GhAP17	1
PheMADS15	1
NbSVP	1
pMADS3	1
NdAP3	1
VvFLC2	1
OsMADS21	1
OsMDP1	1
MaMADS	1
MaMADS2	1
MaMADS1	1
MaMADS4	1
MaMADS3	1
BpMADS3	1
BpMADS5	1
HoAGL6	1
PsDAM	1
PsDAM6	1
ZbAGL11	1
OsAGPL2	1
MdMADS1	1
PcDAM1	1
PcDAM2	1
PpDAM2	1
EjAGL65	1
EjAGL15	1
MADS12	1
DOLL1	1
ODDSOC2	1
LcMADSs	1
LcMADS	1
LcMADS51	1
LcMADS42	1
BnaAGL11	1
AtAGL11	1
BnaC09AGL09	1
BnaA03AGL03	1
BnaA09AGL09	1
PpMADS1	1
PpMADS3	1
CcMADS20	1
OAP3	1
OAGL6	1
AcAGL6	1
AcFUL1	1
AcSEP1	1
AcAG	1
AcAGL11a11	1
MADS32	1
OsMADS6	1
GmSEP1	1
GmMADS28	1
DfMADS1	1
NtMADS4	1
NtMADS11	1
LcMADS1	1
LcMADS3	1
LcMADS7	1
LcMADS2	1
LcMADS9	1
LcMADS11	1
LcMADS4	1
LcMADS10	1
EjSVPs	1
EjSVP1	1
EjSVP2	1
EjSVP	1
EjSOC1s1	1
EjSOC1	1
EjAP1s1	1
MdFLC1	1
MdFLC3	1
MdFLC1c1	1
MdFLC1a1	1
MdFLC1b1	1
StMADS	1
OsMADS62	1
OsMADS63	1
IbAGL17	1
IbAGL20	1
IbMADS79	1
OsMADS8	1
IbMADS3	1
IbMADS4	1
MADS14	1
MADS15	1
MADS18	1
TaMADS55	1
HvMADS34	1
MdMADS063	1
MdMADS125	1
MdMADS135	1
MdMADS136	1
CcMADS15	1
HbMADS1	1
HbMADS20	1
FcMADS8	1
OsMADS22	1
OsMADS47	1
OsMADS50	1
OsMADS55	1
GhAGL16	1
MawuAP1	1
MawuAG	1
MawuAGL9	1
DiSOC1s1	1
DiSOC1	1
HvMADS1	1
PpMADSs	1
PpMADS23	1
PpMADS32	1
PpMADS	1
PpMADS14	1
PpMADS18	1
PpMADS33	1
HbMADS4	1
PpDAM11	1
PpDAM12	1
PpDAM13	1
MdMADS6	1
AhFUL	1
AhSEP4	1
AhSEP3b3	1
AhAGL6	1
GhMADS11	1
GhMADS11m11	1
DOAGL24	1
EsSVP	1
PfMADS	1
PfMADS47	1
ZmMADS69	1
EpMADS	1
EpMADS6	1
EpMADS12	1
EpMADS15	1
EpMADS27	1
CsSEP1	1
CsSEP3	1
CsSEP2	1
CsSEP	1
CsSEPs	1
DcMADS1	1
DcMADS2	1
DcMADS3	1
SAP18	1
IlSEP3	1
IlSVP	1
paleoAP3	1
RcAGL19	1
RcAGL24	1
RcSOC1	1
MaMADS36	1
RmSVP	1
MESSAGE	1
MADS62	1
MADS63	1
CsFLC1	1
CsFLC	1
NnSEP1	1
BOXAGL9	1
NnAGL9	1
NnMADS6	1
TgMADS1	1
TgMADS32	1
TgMADS	1
TgMADS3	1
TgMADS15	1
TgMADS16	1
TgMADS19	1
FaMADS1a1	1
MADS_MEF2_like2	1
PeMADS5	1
MnMADS33	1
MnMADSs	1
MnFLC	1
MnMADS50	1
MnMADS7	1
MnMADS	1
MADS11	1
PtMADS11	1
IiAP3	1
DolMADSs	1
DolMADS	1
VvAGL12	1
VvAGL12s12	1
LMADS8	1
LMADS9	1
FaAP3	1
SlAP3Y3	1
SlAP3A3	1
ScAP3A3	1
ZAG2	1
ZAP1	1
ZAG3	1
ZAG4	1
ZAG5	1
PcpMADS	1
PbrMADS	1
GlMADS1	1
IiSVP	1
IiSEP1	1
IiSEP3	1
IiAP1	1
SaMADS	1
BsMADSs	1
MdDAMd	1
MiSVP1	1
MiSVP2	1
MiSVPs	1
AtAGL12	1
NycAG1	1
NycAG2	1
NycAGL6	1
MdDAM1	1
MdDAM4	1
MdJa	1
GsAG1	1
GsAG2	1
CsubMADS1	1
SlMADS5	1
NtAP1	1
NtAG	1
NtSEP1	1
NtSEP2	1
NtSEP3	1
PpDAM3	1
PpDAM	1
PvMADS	1
CsMADS	1
TAG	1
AfimFUL	1
AfimAGL6	1
AfimSEP2	1
AfimAP3	1
AfimAG	1
AfimSEP1	1
LpMADS	1
FveSEP3	1
PkMADS1	1
SaFUL2	1
CvAP3	1
CvSEP3	1
VviAP1	1
ScAG	1
ScAGL11	1
PaMADS7	1
PaMADS2	1
PaMADS4	1
PaMADS5	1
PdMADS42	1
PmiMADS16	1
BpMADS	1
SsMADS	1
AthAGL24	1
PpeDAM6	1
VroAGL11	1
RcMADS1	1
DAM5	1
PavMADS1	1
PavMADS2	1
MADS5	1
HvMADS56	1
PeAP1	1
PeFUL	1
HvMADS2	1
HvMADS4	1
MADS8	1
HvMADS8	1
PeMADS28	1
WSEP	1
MADS45	1
MADS29	1
HvMADS29	1
VcSOC1	1
VcSVP	1
MdAGL24	1
MdSOC1	1
MdAP1	1
MdJa2	1
GmFULc	1
PtAGL24	1
AtAGL24	1
PtSOC1	1
PtAP1	1
EsFUL	1
EsAGL2	1
EsAGL6	1
EsFUL1	1
EsAP3	1
WAG1	1
LoSVP	1
LMADS1	1
OMADS1	1
WAP1	1
TmAP1	1
LMADS2	1
EgMADS1	1
PpMADS131	1
PpMADS132	1
pMADS1	1
pMADS2	1
MdMADS13	1
MdMADS14	1
MdMADS15	1
MdMADS12	1
VvDAM	1
VvDAM3	1
VvDAM4	1
AcFLC	1
AcFLCL	1
DlFLC	1
DlSOC1	1
DlSVP	1
DlSEP1	1
DlMADS53	1
NtSVP	1
SiMADS14	1
SiMADS15	1
BpAP1	1
CeMADS1	1
CeMADS2	1
PeMADS8	1
DOAG1	1
DOAG2	1
VvAG2	1
VvSEP3	1
VvAGL11	1
VvMADS4	1
EgMADS16	1
PsMADS3	1
MdSVPs	1
MdSVPa	1
MdSVPb	1
SlSEP3	1
BroaSEP1	1
BroaSEP2	1
BroaSEP3	1
AS MADS	1
MAGIC	1
PpDAM5	1
GbMADS9	1
CsAP1	1
PsFRUITFULc	1
PsFULc	1
MtFRUITFULc	1
MtFULc	1
SvFUL2	1
GbMADS16	1
IiAGL6	1
PpyDAM3	1
MdMADS5	1
MdMADS11	1
MdMADS10	1
CiMADS43	1
CiAGL9	1
BrSAG12	1
BrAGL8	1
BrAGL15	1
BrAGL42	1
LcAGL6	1
LcSVPb	1
LcSOC1b1	1
LcFULb	1
GmFULa	1
EScaAG1	1
EScaAG2	1
EScaAGL11	1
GmAP3	1
TeAP1	1
TeFUL1	1
TeFUL2	1
TeFUL3	1
TeSEP	1
TeFUL	1
TeAG1	1
TeAG2	1
TeAGL11	1
NbMADS1	1
TaSEP3	1
EgAGL9	1
VvMADS28	1
VvMADS39	1
SlMADS39	1
DcaMADS	1
EuMADS	1
EuMADS39	1
EuMADS65	1
CmSVP	1
ZlMADS57	1
ZlMADS85	1
ZlMADS45	1
ZlMADS81	1
ZlMADS66	1
ZlMADS14	1
ZlMADS15	1
ZlMADS32	1
ZlMADS36	1
ZlMADS59	1
ZlMADS71	1
PmDAM	1
PmDAM2	1
PmDAM3	1
PmSVPs	1
PmDAM5	1
PmSVP1	1
PmSVP2	1
AtAP1	1
GAGA1	1
PgMADS03	1
PgMADS21	1
PgMADS27	1
PgMADS29	1
PgMADS15	1
GmAGL15	1
MbMADS	1
MbMADSes	1
MaMADSes	1
MbMADS75	1
BnaSVP	1
BnaSEP1	1
PfAG5	1
PfMADS16	1
PfMADS2	1
CchMADS31	1
CchMADS58	1
CchMADS55	1
CsMADS02	1
ItfMADS	1
MpMADS1	1

## Sheet: MADS box to organ association
MADS IDs	No. of associated plant organs
FLC	7
FUL	7
SVP	7
SOC1	7
AP1	7
AG	6
SEP1	6
AGL17	6
AGL15	6
AGL24	6
AGL6	5
STK	5
SEP3	5
PI	5
SHP2	4
SEP2	4
AP3	4
AGL16	4
XAL1	4
ANR1	4
TT16	3
SHP1	3
GOA	3
MAF1	3
AGL21	3
XAL2	3
AGL62	2
AGL19	2
FYF	2
AGL13	2
PHE1	1
AGL18	1
MAF2	1
MAF4	1
MAF5	1
MAF3	1
CAL	1
SEP4	1

## Sheet: Cross-spp MADS-tissue associat
Cross spp MADS IDs	No. of associated plant organs
STMADS11	6
TAGL1	5
OsMADS57	4
STMADS16	3
VRN1	3
OsMADS1	3
HkSVP	3
euFUL	3
BpMADS4	3
SlMBP3	3
MdDAMs	3
OsMADS26	3
AtFLC	2
SlMADS1	2
TAG1	2
MdFLC	2
PpDAM1	2
GmAGL1	2
OsMADS29	2
MADS6	2
DOSOC1	2
OsMADS13	2
OsMADS32	2
OsMADS58	2
OsMADS3	2
MADS1	2
PpMADS13	2
TM6	2
ZAG1	2
MADS17	2
AtANR1	2
OsMADS25	2
CmANR1	2
VcSOC1K1	1
SlMADS	1
LeMADS	1
SlAGL11	1
MuMADS1	1
OsMADS87	1
MADS68	1
VviAGL11	1
LpMADS1	1
LpMADS10	1
CsSVP	1
AtAP3	1
BcAP3	1
HvMADS58	1
FaSOC1	1
CsSEP4	1
CsAP3	1
CsSOC1	1
PeMADS3	1
PeMADS2	1
AtSOC1	1
IiSEP2	1
IiSEP4	1
AtSVP	1
euAG	1
HvMADS	1
HvMADS16	1
ZmSOC1	1
PeMADS	1
GbMADS	1
PmDAM6	1
PmDAMs	1
PmDAM1	1
euAP3	1
LOFSEP	1
OsMADS	1
OsMADS34	1
PpDAM6	1
OsMADS27	1
OsMADS23	1
OsMADS61	1

## Sheet: Major tissues
Shoots
Word	Frequency
SOC1	11	MIKCc	Type-II
SVP	10	MIKCc	Type-II
AP1	8	MIKCc	Type-II
FUL	7	MIKCc	Type-II
AGL24	6	MIKCc	Type-II
FLC	6	MIKCc	Type-II
ANR1	5	MIKCc	Type-II
XAL1	3	MIKCc	Type-II
XAL2	3	MIKCc	Type-II
AGL21	3	MIKCc	Type-II
AGL17	3	MIKCc	Type-II
FYF	3	MIKCc	Type-II
AGL6	2	MIKCc	Type-II
AGL16	2	MIKCc	Type-II
SEP1	2	MIKCc	Type-II
SEP2	2	MIKCc	Type-II
AGL15	1	MIKCc	Type-II
FYL1	1	MIKCc	Type-II
FYL2	1	MIKCc	Type-II
AGL19	1	MIKCc	Type-II
AG	1	MIKCc	Type-II
SHP2	1	MIKCc	Type-II
CAL	1	MIKCc	Type-II
MAF4	1	MIKCc	Type-II
MAF5	1	MIKCc	Type-II
AP3	1	MIKCc	Type-II
SEP3	1	MIKCc	Type-II
MAF1	1	MIKCc	Type-II
AGL79	1	MIKCc	Type-II
PI	1	MIKCc	Type-II
Leaves
Word	Frequency
SVP	23	MIKCc	Type-II
AP1	22	MIKCc	Type-II
SOC1	14	MIKCc	Type-II
FUL	11	MIKCc	Type-II
FLC	10	MIKCc	Type-II
AG	10	MIKCc	Type-II
SEP3	10	MIKCc	Type-II
AGL6	10	MIKCc	Type-II
AGL24	9	MIKCc	Type-II
AP3	9	MIKCc	Type-II
PI	8	MIKCc	Type-II
AGL15	7	MIKCc	Type-II
SEP1	7	MIKCc	Type-II
AGL17	5	MIKCc	Type-II
STK	4	MIKCc	Type-II
AGL16	3	MIKCc	Type-II
MAF1	3	MIKCc	Type-II
SEP2	3	MIKCc	Type-II
AGL18	2	MIKCc	Type-II
SEP4	2	MIKCc	Type-II
AGL79	2	MIKCc	Type-II
FYF	2	MIKCc	Type-II
AGL34	1	M gamma	Type-I
AGL19	1	MIKCc	Type-II
MAF2	1	MIKCc	Type-II
PHE1	1	M gamma	Type-I
SHP1	1	MIKCc	Type-II
SHP2	1	MIKCc	Type-II
MAF4	1	MIKCc	Type-II
MAF5	1	MIKCc	Type-II
CAL	1	MIKCc	Type-II
ANR1	1	MIKCc	Type-II
AGL21	1	MIKCc	Type-II
TT16	1	MIKCc	Type-II
XAL1	1	MIKCc	Type-II
GOA	1	MIKCc	Type-II
Roots
Word	Frequency
AGL17	10	MIKCc	Type-II
XAL1	8	MIKCc	Type-II
FLC	7	MIKCc	Type-II
AP1	6	MIKCc	Type-II
AGL15	5	MIKCc	Type-II
SVP	5	MIKCc	Type-II
AG	4	MIKCc	Type-II
AGL6	4	MIKCc	Type-II
SEP1	4	MIKCc	Type-II
AGL21	3	MIKCc	Type-II
ANR1	3	MIKCc	Type-II
SOC1	3	MIKCc	Type-II
PI	3	MIKCc	Type-II
AGL16	2	MIKCc	Type-II
MAF1	2	MIKCc	Type-II
FUL	2	MIKCc	Type-II
AGL24	2	MIKCc	Type-II
AP3	2	MIKCc	Type-II
AGL34	1	M gamma	Type-I
AGL18	1	MIKCc	Type-II
AGL19	1	MIKCc	Type-II
MAF2	1	MIKCc	Type-II
AGL79	1	MIKCc	Type-II
SEP4	1	MIKCc	Type-II
MAF4	1	MIKCc	Type-II
MAF5	1	MIKCc	Type-II
SEP2	1	MIKCc	Type-II
TT16	1	MIKCc	Type-II
STK	1	MIKCc	Type-II
AGL13	1	MIKCc	Type-II
XAL2	1	MIKCc	Type-II
SEP3	1	MIKCc	Type-II
SAM
Word	Frequency
SOC1	10	MIKCc	Type-II
AGL24	8	MIKCc	Type-II
AP1	8	MIKCc	Type-II
SVP	7	MIKCc	Type-II
FUL	7	MIKCc	Type-II
FLC	4	MIKCc	Type-II
XAL1	3	MIKCc	Type-II
XAL2	2	MIKCc	Type-II
SEP1	2	MIKCc	Type-II
SEP2	2	MIKCc	Type-II
AGL6	2	MIKCc	Type-II
AGL17	1	MIKCc	Type-II
MAF1	1	MIKCc	Type-II
AP3	1	MIKCc	Type-II
SEP3	1	MIKCc	Type-II
AG	1	MIKCc	Type-II
Flowers
Word	Frequency
SVP	56	MIKCc	Type-II
AP1	56	MIKCc	Type-II
AG	43	MIKCc	Type-II
AP3	38	MIKCc	Type-II
SOC1	37	MIKCc	Type-II
FLC	37	MIKCc	Type-II
SEP3	32	MIKCc	Type-II
AGL6	31	MIKCc	Type-II
PI	30	MIKCc	Type-II
SEP1	27	MIKCc	Type-II
FUL	25	MIKCc	Type-II
AGL24	22	MIKCc	Type-II
STK	19	MIKCc	Type-II
AGL17	15	MIKCc	Type-II
AGL15	14	MIKCc	Type-II
SEP2	12	MIKCc	Type-II
SHP2	8	MIKCc	Type-II
MAF1	7	MIKCc	Type-II
XAL1	7	MIKCc	Type-II
FYF	7	MIKCc	Type-II
MAF2	6	MIKCc	Type-II
MAF5	6	MIKCc	Type-II
TT16	6	MIKCc	Type-II
SHP1	6	MIKCc	Type-II
AGL19	5	MIKCc	Type-II
ANR1	5	MIKCc	Type-II
MAF4	5	MIKCc	Type-II
SEP4	5	MIKCc	Type-II
AGL18	4	MIKCc	Type-II
AGL16	4	MIKCc	Type-II
AGL21	4	MIKCc	Type-II
MAF3	3	MIKCc	Type-II
AGL13	3	MIKCc	Type-II
GOA	3	MIKCc	Type-II
CAL	2	MIKCc	Type-II
XAL2	2	MIKCc	Type-II
AGL34	1	M gamma	Type-I
FYL1	1	MIKCc	Type-II
FYL2	1	MIKCc	Type-II
AGL28	1	M alpha	Type-I
Ovules
Word	Frequency
AG	13	MIKCc	Type-II
STK	13	MIKCc	Type-II
SHP1	7	MIKCc	Type-II
AGL6	7	MIKCc	Type-II
SHP2	6	MIKCc	Type-II
AGL13	4	MIKCc	Type-II
TT16	4	MIKCc	Type-II
AP1	4	MIKCc	Type-II
AGL15	3	MIKCc	Type-II
AGL62	3	M alpha	Type-I
SEP1	3	MIKCc	Type-II
FUL	3	MIKCc	Type-II
SEP2	3	MIKCc	Type-II
SVP	3	MIKCc	Type-II
FEM111	2	M gamma	Type-I
DIA	2	M alpha	Type-I
AGL23	2	M alpha	Type-I
SOC1	2	MIKCc	Type-II
AP3	2	MIKCc	Type-II
PI	2	MIKCc	Type-II
GOA	2	MIKCc	Type-II
AGL16	1	MIKCc	Type-II
AGL18	1	MIKCc	Type-II
AGL19	1	MIKCc	Type-II
MAF1	1	MIKCc	Type-II
MAF2	1	MIKCc	Type-II
FLC	1	MIKCc	Type-II
PHE1	1	M gamma	Type-I
SEP3	1	MIKCc	Type-II
SEP4	1	MIKCc	Type-II
XAL1	1	MIKCc	Type-II
XAL2	1	MIKCc	Type-II
AGL17	1	MIKCc	Type-II
AGL36	1	M gamma	Type-I
AGL24	1	MIKCc	Type-II
pollens
Word	Frequency
AP3	3	MIKCc	Type-II
PI	3	MIKCc	Type-II
AGL19	2	MIKCc	Type-II
AGL15	2	MIKCc	Type-II
SVP	2	MIKCc	Type-II
AGL6	2	MIKCc	Type-II
AG	2	MIKCc	Type-II
SEP3	2	MIKCc	Type-II
AGL16	1	MIKCc	Type-II
AGL18	1	MIKCc	Type-II
MAF1	1	MIKCc	Type-II
MAF2	1	MIKCc	Type-II
FLC	1	MIKCc	Type-II
AGL35	1	M gamma	Type-I
AGL13	1	MIKCc	Type-II
SEP2	1	MIKCc	Type-II
SOC1	1	MIKCc	Type-II
FUL	1	MIKCc	Type-II
AP1	1	MIKCc	Type-II
AGL36	1	M gamma	Type-I
DIA	1	M alpha	Type-I
FEM111	1	M gamma	Type-I
AGL66	1	M delta; MIKC*-S	Type-II
AGL104	1	M delta; MIKC*-S	Type-II
GOA	1	MIKCc	Type-II
AGL17	1	MIKCc	Type-II
seeds
Word	Frequency
FUL	13	MIKCc	Type-II
STK	10	MIKCc	Type-II
AG	9	MIKCc	Type-II
TT16	9	MIKCc	Type-II
AP1	9	MIKCc	Type-II
AGL62	8	M alpha	Type-I
AGL15	8	MIKCc	Type-II
SHP2	8	MIKCc	Type-II
SEP1	7	MIKCc	Type-II
SHP1	7	MIKCc	Type-II
SVP	7	MIKCc	Type-II
PHE1	5	M gamma	Type-I
SEP3	5	MIKCc	Type-II
AGL6	5	MIKCc	Type-II
GOA	5	MIKCc	Type-II
FLC	4	MIKCc	Type-II
SOC1	4	MIKCc	Type-II
SEP2	4	MIKCc	Type-II
AP3	3	MIKCc	Type-II
FEM111	2	M gamma	Type-I
DIA	2	M alpha	Type-I
AGL23	2	M alpha	Type-I
AGL18	2	MIKCc	Type-II
AGL21	2	MIKCc	Type-II
PI	2	MIKCc	Type-II
AGL35	1	M gamma	Type-I
AGL17	1	MIKCc	Type-II
AGL79	1	MIKCc	Type-II
AGL91	1	M alpha	Type-I
AGL40	1	M alpha	Type-I
AGL19	1	MIKCc	Type-II
ANR1	1	MIKCc	Type-II
FYF	1	MIKCc	Type-II
SEP4	1	MIKCc	Type-II
XAL1	1	MIKCc	Type-II
AGL36	1	M gamma	Type-I
AGL90	1	M gamma	Type-I
AGL66	1	M delta; MIKC*-S	Type-II
AGL104	1	M delta; MIKC*-S	Type-II
CAL	1	MIKCc	Type-II
AGL16	1	MIKCc	Type-II
Fruits
Word	Frequency
SVP	16	MIKCc	Type-II
FUL	15	MIKCc	Type-II
AP1	11	MIKCc	Type-II
SOC1	7	MIKCc	Type-II
AG	6	MIKCc	Type-II
STK	6	MIKCc	Type-II
AGL24	6	MIKCc	Type-II
SEP1	5	MIKCc	Type-II
FLC	5	MIKCc	Type-II
SHP1	5	MIKCc	Type-II
AGL15	4	MIKCc	Type-II
SEP3	4	MIKCc	Type-II
SHP2	4	MIKCc	Type-II
XAL1	3	MIKCc	Type-II
AGL17	3	MIKCc	Type-II
ANR1	3	MIKCc	Type-II
GOA	3	MIKCc	Type-II
TT16	3	MIKCc	Type-II
AGL21	2	MIKCc	Type-II
AGL79	2	MIKCc	Type-II
SEP2	2	MIKCc	Type-II
SEP4	2	MIKCc	Type-II
AGL34	1	M gamma	Type-I
AGL6	1	MIKCc	Type-II
AGL19	1	MIKCc	Type-II
FYF	1	MIKCc	Type-II
PI	1	MIKCc	Type-II
AGL16	1	MIKCc	Type-II
Seed germination
Word	Frequency
FUL	3	MIKCc	Type-II
AGL21	2	MIKCc	Type-II
FLC	2	MIKCc	Type-II
AP1	2	MIKCc	Type-II
AGL35	1	M gamma	Type-I
AGL15	1	MIKCc	Type-II
PHE1	1	M gamma	Type-I
TT16	1	MIKCc	Type-II
AGL79	1	MIKCc	Type-II
ANR1	1	MIKCc	Type-II
SOC1	1	MIKCc	Type-II
FYF	1	MIKCc	Type-II
SEP3	1	MIKCc	Type-II
AP3	1	MIKCc	Type-II
STK	1	MIKCc	Type-II
GOA	1	MIKCc	Type-II
AGL16	1	MIKCc	Type-II
SVP	1	MIKCc	Type-II

## Sheet: hormones
Auxin
Word	Frequency
AGL21	3	MIKCc	Type-II
SVP	3	MIKCc	Type-II
AGL15	3	MIKCc	Type-II
XAL2	2	MIKCc	Type-II
ANR1	2	MIKCc	Type-II
AGL62	2	M alpha	Type-I
XAL1	1	MIKCc	Type-II
FUL	1	MIKCc	Type-II
AG	1	MIKCc	Type-II
SHP2	1	MIKCc	Type-II
FYF	1	MIKCc	Type-II
STK	1	MIKCc	Type-II
MAF4	1	MIKCc	Type-II
FLC	1	MIKCc	Type-II
MAF1	1	MIKCc	Type-II
MAF2	1	MIKCc	Type-II
MAF3	1	MIKCc	Type-II
MAF5	1	MIKCc	Type-II
AGL17	1	MIKCc	Type-II
Cytokinin
Word	Frequency
FUL	2	MIKCc	Type-II
AG	1	MIKCc	Type-II
SHP2	1	MIKCc	Type-II
PI	1	MIKCc	Type-II
SOC1	1	MIKCc	Type-II
ethylene
Word	Frequency
FUL	2	MIKCc	Type-II
FYF	1	MIKCc	Type-II
SEP3	1	MIKCc	Type-II
STK	1	MIKCc	Type-II
AGL15	1	MIKCc	Type-II
XAL1	1	MIKCc	Type-II
SVP	1	MIKCc	Type-II
AGL24	1	MIKCc	Type-II
SEP4	1	MIKCc	Type-II
AP3	1	MIKCc	Type-II
gibberellin
Word	Frequency
SVP	7	MIKCc	Type-II
SOC1	5	MIKCc	Type-II
AGL24	3	MIKCc	Type-II
FLC	3	MIKCc	Type-II
AP1	1	MIKCc	Type-II
FYF	1	MIKCc	Type-II
FYL1	1	MIKCc	Type-II
FYL2	1	MIKCc	Type-II
ANR1	1	MIKCc	Type-II
AGL21	1	MIKCc	Type-II
AG	1	MIKCc	Type-II
abscisic acid
Word	Frequency
SVP	5	MIKCc	Type-II
FUL	3	MIKCc	Type-II
AGL24	3	MIKCc	Type-II
AGL21	2	MIKCc	Type-II
SEP1	2	MIKCc	Type-II
SOC1	2	MIKCc	Type-II
AP1	2	MIKCc	Type-II
AGL15	1	MIKCc	Type-II
AGL79	1	MIKCc	Type-II
ANR1	1	MIKCc	Type-II
AG	1	MIKCc	Type-II
AGL16	1	MIKCc	Type-II

## Sheet: factors
Nutrients
Word	Frequency
ANR1	7	MIKCc	Type-II
AGL17	4	MIKCc	Type-II
SOC1	3	MIKCc	Type-II
AGL21	3	MIKCc	Type-II
XAL1	2	MIKCc	Type-II
AGL16	2	MIKCc	Type-II
AGL19	2	MIKCc	Type-II
AGL35	1	M gamma	Type-I
AGL18	1	MIKCc	Type-II
AGL79	1	MIKCc	Type-II
XAL2	1	MIKCc	Type-II
AGL26	1	M beta	Type-I
AGL56	1	M alpha	Type-I
AGL62	1	M alpha	Type-I
STK	1	MIKCc	Type-II
AGL6	1	MIKCc	Type-II
TT16	1	MIKCc	Type-II
defense
Word	Frequency
SVP	6	MIKCc	Type-II
SOC1	5	MIKCc	Type-II
AP1	4	MIKCc	Type-II
SEP3	1	MIKCc	Type-II
AP3	1	MIKCc	Type-II
FUL	1	MIKCc	Type-II
AGL6	1	MIKCc	Type-II
SEP1	1	MIKCc	Type-II
SEP2	1	MIKCc	Type-II
XAL1	1	MIKCc	Type-II
TT16	1	MIKCc	Type-II
ANR1	1	MIKCc	Type-II
FLC	1	MIKCc	Type-II
AGL24	2	MIKCc	Type-II
AGL16	1	MIKCc	Type-II
heat
Word	Frequency
AGL15	1	MIKCc	Type-II
AGL6	1	MIKCc	Type-II
AGL16	1	MIKCc	Type-II
SOC1	1	MIKCc	Type-II
salt response
Word	Frequency
AGL21	2	MIKCc	Type-II
AP1	2	MIKCc	Type-II
AGL6	2	MIKCc	Type-II
ANR1	1	MIKCc	Type-II
AP3	1	MIKCc	Type-II
FUL	1	MIKCc	Type-II
SEP1	1	MIKCc	Type-II
SEP2	1	MIKCc	Type-II
AGL15	1	MIKCc	Type-II
SOC1	1	MIKCc	Type-II
AGL24	1	MIKCc	Type-II
SVP	1	MIKCc	Type-II
AGL16	1	MIKCc	Type-II
osmotic response
Word	Frequency
AGL21	3	MIKCc	Type-II
ANR1	2	MIKCc	Type-II
AGL17	1	MIKCc	Type-II
AGL16	1	MIKCc	Type-II
AP1	1	MIKCc	Type-II
SOC1	1	MIKCc	Type-II
AGL24	1	MIKCc	Type-II
SVP	1	MIKCc	Type-II

## Sheet: flowering to factors
Flowering and roots
Word	Frequency
FLC	5	MIKCc	Type-II
AGL17	3	MIKCc	Type-II
XAL1	3	MIKCc	Type-II
AGL6	3	MIKCc	Type-II
MAF1	2	MIKCc	Type-II
AGL15	2	MIKCc	Type-II
AP1	2	MIKCc	Type-II
AP3	2	MIKCc	Type-II
SEP1	2	MIKCc	Type-II
PI	2	MIKCc	Type-II
AGL16	1	MIKCc	Type-II
AGL18	1	MIKCc	Type-II
AGL19	1	MIKCc	Type-II
MAF2	1	MIKCc	Type-II
AGL79	1	MIKCc	Type-II
MAF4	1	MIKCc	Type-II
MAF5	1	MIKCc	Type-II
FUL	1	MIKCc	Type-II
SEP2	1	MIKCc	Type-II
AG	1	MIKCc	Type-II
AGL21	1	MIKCc	Type-II
SEP3	1	MIKCc	Type-II
Flowering and life cycle
Word	Frequency
FLC	3	MIKCc	Type-II
SOC1	3	MIKCc	Type-II
SEP3	2	MIKCc	Type-II
AP1	1	MIKCc	Type-II
FYF	1	MIKCc	Type-II
AP3	1	MIKCc	Type-II
FUL	1	MIKCc	Type-II
Flowering and Seasonal changes
Word	Frequency
FLC	5	MIKCc	Type-II
SVP	4	MIKCc	Type-II
SOC1	1	MIKCc	Type-II
AGL15	1	MIKCc	Type-II
AGL6	1	MIKCc	Type-II
AGL24	1	MIKCc	Type-II
AP1	1	MIKCc	Type-II
GOA	1	MIKCc	Type-II
Flowering and nutrients
Word	Frequency
SOC1	1	MIKCc	Type-II
AGL21	1	MIKCc	Type-II
AGL17	1	MIKCc	Type-II
Flowering and stresses
Word	Frequency
SVP	48	MIKCc	Type-II
SOC1	45	MIKCc	Type-II
FLC	44	MIKCc	Type-II
AP1	43	MIKCc	Type-II
AGL24	21	MIKCc	Type-II
FUL	20	MIKCc	Type-II
AGL6	14	MIKCc	Type-II
MAF1	13	MIKCc	Type-II
SEP3	13	MIKCc	Type-II
AP3	12	MIKCc	Type-II
AG	11	MIKCc	Type-II
PI	10	MIKCc	Type-II
MAF2	9	MIKCc	Type-II
MAF4	9	MIKCc	Type-II
MAF5	9	MIKCc	Type-II
AGL15	7	MIKCc	Type-II
MAF3	7	MIKCc	Type-II
SEP1	7	MIKCc	Type-II
AGL19	6	MIKCc	Type-II
AGL17	5	MIKCc	Type-II
AGL18	4	MIKCc	Type-II
AGL16	4	MIKCc	Type-II
FYF	4	MIKCc	Type-II
XAL1	4	MIKCc	Type-II
STK	3	MIKCc	Type-II
XAL2	2	MIKCc	Type-II
AGL79	2	MIKCc	Type-II
SEP2	2	MIKCc	Type-II
SHP2	1	MIKCc	Type-II
AGL13	1	MIKCc	Type-II
TT16	1	MIKCc	Type-II
ANR1	1	MIKCc	Type-II
CAL	1	MIKCc	Type-II
FYL1	1	MIKCc	Type-II
FYL2	1	MIKCc	Type-II
SEP4	1	MIKCc	Type-II
AGL50	1	M beta	Type-I
GOA	1	MIKCc	Type-II
AGL28	1	M alpha	Type-I
AGL21	1	MIKCc	Type-II
Flowering and hormonal cues
Word	Frequency
SOC1	8	MIKCc	Type-II
SVP	4	MIKCc	Type-II
AGL24	4	MIKCc	Type-II
FLC	4	MIKCc	Type-II
AP1	2	MIKCc	Type-II
FUL	2	MIKCc	Type-II
FYF	1	MIKCc	Type-II
FYL1	1	MIKCc	Type-II
FYL2	1	MIKCc	Type-II
XAL1	1	MIKCc	Type-II
PI	1	MIKCc	Type-II
MAF4	1	MIKCc	Type-II
MAF1	1	MIKCc	Type-II
MAF2	1	MIKCc	Type-II
MAF3	1	MIKCc	Type-II
MAF5	1	MIKCc	Type-II
AGL21	1	MIKCc	Type-II
AGL17	1	MIKCc	Type-II
Flowering and aging
Word	Frequency
XAL1	1	MIKCc	Type-II
SOC1	1	MIKCc	Type-II
FLC	1	MIKCc	Type-II
Flowering and fruits/seeds development
Word	Frequency
AP1	13	MIKCc	Type-II
FUL	10	MIKCc	Type-II
SVP	10	MIKCc	Type-II
SOC1	8	MIKCc	Type-II
FLC	6	MIKCc	Type-II
AGL24	4	MIKCc	Type-II
SEP3	3	MIKCc	Type-II
AGL15	2	MIKCc	Type-II
FYF	2	MIKCc	Type-II
AG	2	MIKCc	Type-II
AP3	2	MIKCc	Type-II
SEP2	2	MIKCc	Type-II
AGL6	2	MIKCc	Type-II
SEP1	2	MIKCc	Type-II
AGL19	1	MIKCc	Type-II
SEP4	1	MIKCc	Type-II
XAL1	1	MIKCc	Type-II
GOA	1	MIKCc	Type-II
PI	1	MIKCc	Type-II
Most frequent MADS box members among independent factors associated gene pools (central gene pool in Figure 8)
Word	Gene pool association count
SOC1	7	MIKCc	Type-II
FLC	7	MIKCc	Type-II
AP1	6	MIKCc	Type-II
FUL	5	MIKCc	Type-II
XAL1	5	MIKCc	Type-II
AGL21	4	MIKCc	Type-II
AGL17	4	MIKCc	Type-II
SEP3	4	MIKCc	Type-II
FYF	4	MIKCc	Type-II
AP3	4	MIKCc	Type-II
AGL15	4	MIKCc	Type-II
SVP	4	MIKCc	Type-II
AGL24	4	MIKCc	Type-II
AGL6	4	MIKCc	Type-II
PI	4	MIKCc	Type-II
MAF2	3	MIKCc	Type-II
MAF1	3	MIKCc	Type-II
AGL19	3	MIKCc	Type-II
MAF4	3	MIKCc	Type-II
MAF5	3	MIKCc	Type-II
AG	3	MIKCc	Type-II
SEP1	3	MIKCc	Type-II
SEP2	3	MIKCc	Type-II
GOA	3	MIKCc	Type-II
AGL18	2	MIKCc	Type-II
AGL16	2	MIKCc	Type-II
MAF3	2	MIKCc	Type-II
FYL1	2	MIKCc	Type-II
FYL2	2	MIKCc	Type-II
AGL79	2	MIKCc	Type-II
SEP4	2	MIKCc	Type-II
SHP2	1	MIKCc	Type-II
AGL13	1	MIKCc	Type-II
XAL2	1	MIKCc	Type-II
TT16	1	MIKCc	Type-II
ANR1	1	MIKCc	Type-II
CAL	1	MIKCc	Type-II
STK	1	MIKCc	Type-II
AGL50	1	M beta	Type-I
AGL28	1	M alpha	Type-I
