# Supplementary material for: Functional Overview on Mads Box: A Meta-Review
Source: Preprints.org preprint supplement (doi:10.20944/preprints202405.1691.v1), 2024-05-27
Supplement: Supplementary file 2 [file supplementary › Supplementary Dataset 2.xlsx]

## Sheet: Sheet1
Supplementary Dataset 2: References used in the local database. (Note the summaries of each abstract were machine generated)
Authors	Affiliations	Article title	Short title	Publication year	Keywords	Abstract	Abstract summary	Journal	Vol.	Issue	Start page	SN	DOI	URL
Aamir, M. | Shanmugam, V. | Dubey, M. K. | Husain, F. M. | Adil, M. | Ansari, W. A. | Rai, A. | Sah, P.	Division of Plant Pathology, ICAR-Indian Agricultural Research Institute, Pusa, New Delhi-110012, Delhi, India. khan.aamir18@gmail.com.	Transcriptomic characterization of Trichoderma harzianum T34 primed tomato plants: assessment of biocontrol agent induced host specific gene expression and plant growth promotion	Transcriptomic characterization of Trichoderma harzianum T34 primed tomato plants: assessment of biocontrol agent induced host specific gene expression and plant growth promotion	2023	Transcriptome	In this study, we investigated the intricate interplay between Trichoderma and the tomato genome, focusing on the transcriptional and metabolic changes triggered during the late colonization event. Microarray probe set (GSE76332) was utilized to analyze the gene expression profiles changes of the un-inoculated control (tomato) and Trichoderma-tomato interactions for identification of the differen…	a positive correlation was observed between the two cross-comparable groups . 156 common genes were consistently significant across all probability thresholds . metabolic shifting and biochemical changes were also identified .	BMC Plant Biol	23	1	552	1471-2229 (Electronic)	10.1186/s12870-023-04502-6	https://www.ncbi.nlm.nih.gov/pubmed/37940862
Abolghasemi, R. | Haghighi, M. | Etemadi, N. | Wang, S. | Soorni, A.	Department of Horticulture, College of Agriculture, Isfahan University of Technology, Isfahan, Iran.	Transcriptome architecture reveals genetic networks of bolting regulation in spinach	Transcriptome architecture reveals genetic networks of bolting regulation in spinach	2021	*Gene Regulatory Networks	BACKGROUND: Bolting refers to the early flowering stem production on agricultural and horticultural crops before harvesting. Indeed, bolting is an event induced by the coordinated effects of various environmental factors and endogenous genetic components, which cause a large reduction in the quality and productivity of vegetable crops like spinach. However, little is known about the signaling pat…	bolting refers to the early flowering stem production on agricultural and horticultural crops . little is known about the signaling pathways and molecular functions involved in bolting mechanisms in spinach . genetic information regarding transition from vegetative growth to reproductive stage could regulate bolting time .	BMC Plant Biol	21	1	179	1471-2229 (Electronic)	10.1186/s12870-021-02956-0	https://www.ncbi.nlm.nih.gov/pubmed/33853527
Abraham-Juarez, M. J. | Schrager-Lavelle, A. | Man, J. | Whipple, C. | Handakumbura, P. | Babbitt, C. | Bartlett, M.	Biology Department, University of Massachusetts, Amherst, 01003 Massachusetts.	Evolutionary Variation in MADS Box Dimerization Affects Floral Development and Protein Abundance in Maize	Evolutionary Variation in MADS Box Dimerization Affects Floral Development and Protein Abundance in Maize	2020	Chromatin Assembly and Disassembly	Interactions between MADS box transcription factors are critical in the regulation of floral development, and shifting MADS box protein-protein interactions are predicted to have influenced floral evolution. However, precisely how evolutionary variation in protein-protein interactions affects MADS box protein function remains unknown. To assess the impact of changing MADS box protein-protein inte…	how evolutionary variation in protein-protein interactions affects MADS box protein function remains unknown . coding change in a pleiotropic master regulator could have small, quantitative effects on development . differential dimerization affects protein degradation, independent of transcript levels .	Plant Cell	32	11	3408-3424	1532-298X (Electronic)	10.1105/tpc.20.00300	https://www.ncbi.nlm.nih.gov/pubmed/32873631
Aceto, S. | Sica, M. | De Paolo, S. | D'Argenio, V. | Cantiello, P. | Salvatore, F. | Gaudio, L.	Department of Biology, University of Naples Federico II, Napoli, Italy.	The analysis of the inflorescence miRNome of the orchids Orchis italica reveals a DEF-like MADS-box gene as a new miRNA target	The analysis of the inflorescence miRNome of the orchids Orchis italica reveals a DEF-like MADS-box gene as a new miRNA target	2014	Amino Acid Sequence	Plant microRNAs (miRNAs) are small, regulatory non-coding RNAs involved in a wide range of biological processes, from organ development to response to stimuli. In recent years, an increasing number of studies on model plant species have highlighted the evolutionary conservation of a high number of miRNA families and the existence of taxon-specific ones. However, few studies have examined miRNAs i…	plant microRNAs (miRNAs) are small, regulatory non-coding RNAs . miRNAs are involved in a wide range of biological processes, from organ development to response to stimuli . a small RNA library of inflorescence tissue of the Mediterranean orchid Orchis italica was used .	PLoS One	9	5	e97839	1932-6203 (Electronic)	10.1371/journal.pone.0097839	https://www.ncbi.nlm.nih.gov/pubmed/24832004
Acri-Nunes-Miranda, R. | Mondragon-Palomino, M.	Department of Cell Biology and Plant Biochemistry, University of Regensburg Regensburg, Germany.	Expression of paralogous SEP-, FUL-, AG- and STK-like MADS-box genes in wild-type and peloric Phalaenopsis flowers	Expression of paralogous SEP-, FUL-, AG- and STK-like MADS-box genes in wild-type and peloric Phalaenopsis flowers	2014	Orchidaceae	The diverse flowers of Orchidaceae are the result of several major morphological transitions, among them the most studied is the differentiation of the inner median tepal into the labellum, a perianth organ key in pollinator attraction. Type A peloria lacking stamens and with ectopic labella in place of inner lateral tepals are useful for testing models on the genes specifying these organs by com…	the Òorchid codeÓ model summarizes this work and shows in Orchidaceae there are four paralogous lineages of italic>DEFICIENS/AP3/italica>-like genes differentially expressed in each floral whorl . the gene trees indicate orchid-specific duplications .	Front Plant Sci	5		76	1664-462X (Print)	10.3389/fpls.2014.00076	https://www.ncbi.nlm.nih.gov/pubmed/24659990
Adamczyk, B. J. | Lehti-Shiu, M. D. | Fernandez, D. E.	Department of Botany, University of Wisconsin-Madison, 430 Lincoln Drive, Madison, WI 53706-1381, USA.	The MADS domain factors AGL15 and AGL18 act redundantly as repressors of the floral transition in Arabidopsis	The MADS domain factors AGL15 and AGL18 act redundantly as repressors of the floral transition in Arabidopsis	2007	Arabidopsis/genetics/*growth & development/metabolism	The developmental roles of AGL15 and AGL18, members of the AGL15-like clade of MADS domain regulatory factors, have not been defined previously. Analysis of transgenic Arabidopsis plants showed that overexpression of AGL18 produces the same phenotypic changes as overexpression of AGL15, and the two genes have partially overlapping expression patterns. Functional redundancy was confirmed through a…	members of the AGL15-like clade of MADS domain regulatory factors . overexpression of AGL18 produces the same phenotypic changes as overexpression . agl15 and Agl18 act upstream of the floral integrator FT .	Plant J	50	6	1007-19	0960-7412 (Print)	10.1111/j.1365-313X.2007.03105.x	https://www.ncbi.nlm.nih.gov/pubmed/17521410
Adamski, N. M. | Simmonds, J. | Brinton, J. F. | Backhaus, A. E. | Chen, Y. | Smedley, M. | Hayta, S. | Florio, T. | Crane, P. | Scott, P. | Pieri, A. | Hall, O. | Barclay, J. E. | Clayton, M. | Doonan, J. H. | Nibau, C. | Uauy, C.	John Innes Centre, Norwich Research Park, Norwich, NR4 7UH, UK.	Ectopic expression of Triticum polonicum VRT-A2 underlies elongated glumes and grains in hexaploid wheat in a dosage-dependent manner	Ectopic expression of Triticum polonicum VRT-A2 underlies elongated glumes and grains in hexaploid wheat in a dosage-dependent manner	2021	Ectopic Gene Expression/genetics/physiology	Flower development is an important determinant of grain yield in crops. In wheat (Triticum spp.) , natural variation for the size of spikelet and floral organs is particularly evident in Triticum turgidum ssp. polonicum (also termed Triticum polonicum) , a tetraploid subspecies of wheat with long glumes, lemmas, and grains. Using map-based cloning, we identified VEGETATIVE TO REPRODUCTIVE TRANSIT…	natural variation for the size of spikelet and floral organs is evident in wheat . vegetative to reproducitive transition 2 encodes a MADS-box transcription factor . mutation results in ectopic expression of the T. polonicum VRT-A2 allele .	Plant Cell	33	7	2296-2319	1532-298X (Electronic)	10.1093/plcell/koab119	https://www.ncbi.nlm.nih.gov/pubmed/34009390
Aerts, N. | de Bruijn, S. | van Mourik, H. | Angenent, G. C. | van Dijk, A. D. J.	Bioscience, Wageningen UR, Droevendaalsesteeg 1, Wageningen, The Netherlands.	Comparative analysis of binding patterns of MADS-domain proteins in Arabidopsis thaliana	Comparative analysis of binding patterns of MADS-domain proteins in Arabidopsis thaliana	2018	Arabidopsis/genetics/growth & development/*metabolism	BACKGROUND: Correct flower formation requires highly specific temporal and spatial regulation of gene expression. In Arabidopsis thaliana the majority of the master regulators that determine flower organ identity belong to the MADS-domain transcription factor family. The canonical DNA binding motif for this transcription factor family is the CArG-box, which has the consensus CC (A/T) (6) GG. Howe…	a comprehensive analysis of MADS-domain binding patterns has not yet been performed . the preferred DNA binding motif of each protein was a CArG-box with an NAA extension . motifs of other transcription factors were also found in the vicinity of binding sites .	BMC Plant Biol	18	1	131	1471-2229 (Electronic)	10.1186/s12870-018-1348-8	https://www.ncbi.nlm.nih.gov/pubmed/29940855
Agliassa, C. | Narayana, R. | Bertea, C. M. | Rodgers, C. T. | Maffei, M. E.	Plant Physiology Unit, Department of Life Sciences and Systems Biology, University of Turin, Turin, Italy.	Reduction of the geomagnetic field delays Arabidopsis thaliana flowering time through downregulation of flowering-related genes	Reduction of the geomagnetic field delays Arabidopsis thaliana flowering time through downregulation of flowering-related genes	2018	Arabidopsis/anatomy & histology/*growth & development/*metabolism	Variations in magnetic field (MF) intensity are known to induce plant morphological and gene expression changes. In Arabidopsis thaliana Col-0, near-null magnetic field (NNMF, i.e., <100 nT MF) causes a delay in the transition to flowering, but the expression of genes involved in this response has been poorly studied. Here, we showed a time-course quantitative analysis of the expression of both l…	a near-null magnetic field (NNMF) causes a delay in the transition to flowering . but the expression of genes involved in this response has been poorly studied . NNMF induced a delayed flowering time and a significant reduction of leaf area index and flowering stem length, with respect to controls .	Bioelectromagnetics	39	5	361-374	1521-186X (Electronic)	10.1002/bem.22123	https://www.ncbi.nlm.nih.gov/pubmed/29709075
Ahmad, S. | Lu, C. | Wu, J. | Wei, Y. | Gao, J. | Jin, J. | Zheng, C. | Zhu, G. | Yang, F.	Guangdong Key Laboratory of Ornamental Plant Germplasm Innovation and Utilization, Environmental Horticulture Research Institute, Guangdong Academy of Agricultural Sciences, Guangzhou 510640, China.	Transcriptional Cascade in the Regulation of Flowering in the Bamboo orchids Arundina graminifolia	Transcriptional Cascade in the Regulation of Flowering in the Bamboo orchids Arundina graminifolia	2021	Flowers/genetics/*metabolism	Flowering in orchids is the most important horticultural trait regulated by multiple mechanisms. Arundina graminifolia flowers throughout the year unlike other orchids with a narrow flowering span. However, little is known of the genetic regulation of this peculiar flowering pattern. This study identifies a number of transcription factor (TF) families in five stages of flower development and four…	this study identifies a number of transcription factor (TF) families in five stages of flower development and four tissue types . the most abundant TF family was bHLH, followed by MYB and WRKY .	Biomolecules	11	6		2218-273X (Electronic)	10.3390/biom11060771	https://www.ncbi.nlm.nih.gov/pubmed/34063940
Ahmad, S. | Yang, K. | Chen, G. | Huang, J. | Hao, Y. | Tu, S. | Zhou, Y. | Zhao, K. | Chen, J. | Shi, X. | Lan, S. | Liu, Z. | Peng, D.	Key Laboratory of National Forestry and Grassland Administration for orchids Conservation and Utilization at College of Landscape Architecture and Art, Fujian Agriculture and Forestry University, Fuzhou, China.	Transcriptome mining of hormonal and floral integrators in the leafless flowers of three cymbidium orchids	Transcriptome mining of hormonal and floral integrators in the leafless flowers of three cymbidium orchids	2022	leafless flowering	Flowering is the most studied ornamental trait in orchids where long vegetative phase may span up to three years. Cymbidium orchids produce beautiful flowers with astonishing shapes and pleasant scent. However, an unusually long vegetative phase is a major drawback to their ornamental value. We observed that under certain culture conditions, three cymbidium species (Cymbidium ensifolium, C. goeri…	cymbidium orchids produce beautiful flowers with astonishing shapes and pleasant scent . an unusually long vegetative phase is a major drawback to their ornamental value . under certain culture conditions, three species skipped vegetative growth phase and directly flowered within six months .	Front Plant Sci	13		1043099	1664-462X (Print)	10.3389/fpls.2022.1043099	https://www.ncbi.nlm.nih.gov/pubmed/36311107
Ai, Y. | Li, Z. | Sun, W. H. | Chen, J. | Zhang, D. | Ma, L. | Zhang, Q. H. | Chen, M. K. | Zheng, Q. D. | Liu, J. F. | Jiang, Y. T. | Li, B. J. | Liu, X. | Xu, X. Y. | Yu, X. | Zheng, Y. | Liao, X. Y. | Zhou, Z. | Wang, J. Y. | Wang, Z. W. | Xie, T. X. | Ma, S. H. | Zhou, J. | Ke, Y. J. | Zhou, Y. Z. | Lu, H. C. | Liu, K. W. | Yang, F. X. | Zhu, G. F. | Huang, L. | Peng, D. H. | Chen, S. P. | La…	Key Laboratory of National Forestry and Grassland Administration for orchids Conservation and Utilization at College of Landscape Architecture, Fujian Agriculture and Forestry University, Fuzhou, China.	The Cymbidium genome reveals the evolution of unique morphological traits	The Cymbidium genome reveals the evolution of unique morphological traits	2021		The marvelously diverse Orchidaceae constitutes the largest family of angiosperms. The genus Cymbidium in Orchidaceae is well known for its unique vegetation, floral morphology, and flower scent traits. Here, a chromosome-scale assembly of the genome of Cymbidium ensifolium (Jianlan) is presented. Comparative genomic analysis showed that C. ensifolium has experienced two whole-genome duplication …	a chromosome-scale assembly of the genome ofCymbidium ensifolium(Jianlan) is presented . the genus is well known for its unique vegetation, floral morphology, and flower scent traits .	Hortic Res	8	1	255	2662-6810 (Print)	10.1038/s41438-021-00683-z	https://www.ncbi.nlm.nih.gov/pubmed/34848682
Airoldi, C. A. | Davies, B.	Centre for Plant Sciences, University of Leeds, Leeds LS2 9JT, UK.	Gene duplication and the evolution of plant MADS-box transcription factors	Gene duplication and the evolution of plant MADS-box transcription factors	2012	Arabidopsis/*genetics/metabolism	Since the first MADS-box transcription factor genes were implicated in the establishment of floral organ identity in a couple of model plants, the size and scope of this gene family has begun to be appreciated in a much wider range of species. Over the course of millions of years the number of MADS-box genes in plants has increased to the point that the Arabidopsis genome contains more than 100. …	the number of MADS-box genes in plants has increased to the point that the Arabidopsis genome contains more than 100 . this large plant transcription factor gene family is an ideal subject to study the processes that lead to an increase in gene number .	J Genet Genomics	39	4	157-65	1673-8527 (Print)	10.1016/j.jgg.2012.02.008	https://www.ncbi.nlm.nih.gov/pubmed/22546537
Airoldi, C. A. | McKay, M. | Davies, B.	Centre for Plant Sciences, University of Leeds, Leeds, United Kingdom.	MAF2 Is Regulated by Temperature-Dependent Splicing and Represses Flowering at Low Temperatures in Parallel with FLM	MAF2 Is Regulated by Temperature-Dependent Splicing and Represses Flowering at Low Temperatures in Parallel with FLM	2015	Alternative Splicing	Plants enter their reproductive phase when the environmental conditions are favourable for the successful production of progeny. The transition from vegetative to reproductive phase is influenced by several environmental factors including ambient temperature. In the model plant Arabidopsis thaliana, SHORT VEGETATIVE PHASE (SVP) is critical for this pathway; svp mutants cannot modify their floweri…	mutants cannot modify their flowering time in response to ambient temperature . SVP encodes a MADS-box transcription factor that directly represses genes that promote flowering . small temperature changes post-transcriptionally regulate FLM through temperature-dependent alternative splicing (TD-AS)	PLoS One	10	5	e0126516	1932-6203 (Electronic)	10.1371/journal.pone.0126516	https://www.ncbi.nlm.nih.gov/pubmed/25955034
Akhter, S. | Kretzschmar, W. W. | Nordal, V. | Delhomme, N. | Street, N. R. | Nilsson, O. | Emanuelsson, O. | Sundstrom, J. F.	Linnean Center for Plant Biology, Uppsala BioCenter, Department of Plant Biology, Swedish University of Agricultural Sciences, Uppsala, Sweden.	Integrative Analysis of Three RNA Sequencing Methods Identifies Mutually Exclusive Exons of MADS-Box Isoforms During Early Bud Development in Picea abies	Integrative Analysis of Three RNA Sequencing Methods Identifies Mutually Exclusive Exons of MADS-Box Isoforms During Early Bud Development in Picea abies	2018	Dal19	Recent efforts to sequence the genomes and transcriptomes of several gymnosperm species have revealed an increased complexity in certain gene families in gymnosperms as compared to angiosperms. One example of this is the gymnosperm sister clade to angiosperm TM3-like MADS-box genes, which at least in the conifer lineage has expanded in number of genes. We have previously identified a member of th…	gymnosperm sister clade to angiosperm TM3-like MADS-box genes has expanded . conifer gene italic>DEFICIENS AGAMOUS LIKE 19 (DAL19) produces six mature mRNA splice variants . 152 of these isoforms were differentially expressed across eight female, male, and vegetative buds .	Front Plant Sci	9		1625	1664-462X (Print)	10.3389/fpls.2018.01625	https://www.ncbi.nlm.nih.gov/pubmed/30483285
Alexandre, C. M. | Hennig, L.	Institute of Plant Sciences and Zurich-Basel Plant Science Center, ETH Zurich, CH-8092 Zurich, Switzerland.	FLC or not FLC: the other side of vernalization	FLC or not FLC: the other side of vernalization	2008	Animals	Vernalization is the promotion of the competence for flowering by long periods of low temperatures such as those typically experienced during winters. In Arabidopsis, the vernalization response is, to a large extent, mediated by the repression of the floral repressor FLC, and the stable epigenetic silencing of FLC after cold treatments is essential for vernalization. In addition to FLC, other ver…	inArabidopsis, vernalization is mediated by the repression of the floral repressorFLC . in grasses, veralization seems to be entirely independent ofFLC, a review focuses on the role ofAGL19,AGL24, and theMAFgenes .	J Exp Bot	59	6	1127-35	1460-2431 (Electronic)	10.1093/jxb/ern070	https://www.ncbi.nlm.nih.gov/pubmed/18390846
Aloryi, K. D. | Okpala, N. E. | Amo, A. | Bello, S. F. | Akaba, S. | Tian, X.	Hubei Collaborative Innovation Centre for Grain Industry, College of Agriculture, Yangtze University, Jingzhou, China.	A meta-quantitative trait loci analysis identified consensus genomic regions and candidate genes associated with grain yield in rice	A meta-quantitative trait loci analysis identified consensus genomic regions and candidate genes associated with grain yield in rice	2022	Genome-Wide Association Studies	Improving grain yield potential in rice is an important step toward addressing global food security challenges. The meta-QTL analysis offers stable and robust QTLs irrespective of the genetic background of mapping populations and phenotype environment and effectively narrows confidence intervals (CI) for candidate gene (CG) mining and marker-assisted selection improvement. To achieve these aims, …	a meta-qtl analysis offers stable and robust QTLs . a total of 62 MQTLs were identified with reduced mean CI (up to 3.40 fold) 10 of these MqTLs harbored at least six of the initial QTL from diverse genetic backgrounds .	Front Plant Sci	13		1035851	1664-462X (Print)	10.3389/fpls.2022.1035851	https://www.ncbi.nlm.nih.gov/pubmed/36466247
Alquicer, G. | Ibrahim, E. | Maruthi, M. N. | Kundu, J. K.	Plant Virus and Vector Interactions-Centre for Plant Virus Research, Crop Research Institute, Drnovska 507, 161 06 Prague, Czech Republic.	Identifying Putative Resistance Genes for Barley Yellow Dwarf Virus-PAV in Wheat and Barley	Identifying Putative Resistance Genes for Barley Yellow Dwarf Virus-PAV in Wheat and Barley	2023	*Luteovirus/genetics	Barley yellow dwarf viruses (BYDVs) are one of the most widespread and economically important plant viruses affecting many cereal crops. Growing resistant varieties remains the most promising approach to reduce the impact of BYDVs. A Recent RNA sequencing analysis has revealed potential genes that respond to BYDV infection in resistant barley genotypes. Together with a comprehensive review of the…	growing resistant varieties remains the most promising approach to reduce the impact of BYDVs . nine putative barley and wheat genes were selected to investigate their involvement in resistance . the highest level of resistance was found in the susceptible genotypes Graciosa and Semper .	Viruses	15	3		1999-4915 (Electronic)	10.3390/v15030716	https://www.ncbi.nlm.nih.gov/pubmed/36992425
Alvarez-Buylla, E. R. | Garcia-Ponce, B. | Sanchez, M. P. | Espinosa-Soto, C. | Garcia-Gomez, M. L. | Pineyro-Nelson, A. | Garay-Arroyo, A.	Departamento de Ecologia Funcional, Instituto de Ecologia, Universidad Nacional Autonoma de Mexico, 3er Circuito Exterior, Ciudad Universitaria, Coyoacan, D.F. 04510, Mexico.	MADS-box genes underground becoming mainstream: plant root developmental mechanisms	MADS-box genes underground becoming mainstream: plant root developmental mechanisms	2019	Epigenesis, Genetic	Plant growth is largely post-embryonic and depends on meristems that are active throughout the lifespan of an individual. Developmental patterns rely on the coordinated spatio-temporal expression of different genes, and the activity of transcription factors is particularly important during most morphogenetic processes. MADS-box genes constitute a transcription factor family in eukaryotes. In Arab…	MADS-box genes constitute a transcription factor family in eukaryotes . in Arabidopsis, their roles in root development are still not well characterized . role of Trithorax group and Polycomb group complexes on epigenetic regulation is also discussed .	New Phytol	223	3	1143-1158	1469-8137 (Electronic)	10.1111/nph.15793	https://www.ncbi.nlm.nih.gov/pubmed/30883818
Alvarez-Buylla, E. R. | Pelaz, S. | Liljegren, S. J. | Gold, S. E. | Burgeff, C. | Ditta, G. S. | Ribas de Pouplana, L. | Martinez-Castilla, L. | Yanofsky, M. F.	Department of Biology, University of California at San Diego, La Jolla, CA 92093-0116, USA. abuylla@servidor.unam.mx	An ancestral MADS-box gene duplication occurred before the divergence of plants and animals	An ancestral MADS-box gene duplication occurred before the divergence of plants and animals	2000	Amino Acid Sequence	Changes in genes encoding transcriptional regulators can alter development and are important components of the molecular mechanisms of morphological evolution. MADS-box genes encode transcriptional regulators of diverse and important biological functions. In plants, MADS-box genes regulate flower, fruit, leaf, and root development. Recent sequencing efforts in Arabidopsis have allowed a nearly co…	recent sequencing efforts have allowed a nearly complete sampling of the MADS-box gene family from a single plant . a gene duplication ancestral to the divergence of plants and animals gave rise to two main lineages .	Proc Natl Acad Sci U S A	97	10	5328-33	0027-8424 (Print)	10.1073/pnas.97.10.5328	https://www.ncbi.nlm.nih.gov/pubmed/10805792
AlvarezâBuylla, Elena R. | Liljegren, Sarah J. | Pelaz, Soraya | Gold, Scott E. | Burgeff, Caroline | Ditta, Gary S. | VergaraâSilva, Francisco | Yanofsky, Martin F.		MADSâbox gene evolution beyond flowers: expression in pollen, endosperm, guard cells, roots and trichomes	MADSâbox gene evolution beyond flowers: expression in pollen, endosperm, guard cells, roots and trichomes	2008		MADS-box genes encode transcriptional regulators involved in diverse aspects of plant development. Here we describe the cloning and mRNA spatio-temporal expression patterns of five new MADS-box genes from Arabidopsis: AGL16, AGL18, AGL19, FLM and AGL31. These genes will probably become important molecular tools for both evolutionary and functional analyses of vegetative structures. We mapped our …	cloning and mRNA spatio-temporal expression patterns of five new MADS-box genes from Arabidopsis . genes will probably become important molecular tools for both evolutionary and functional analyses of vegetative structures .	The Plant Journal	24	4	457-466	0960-7412	10.1111/j.1365-313X.2000.00891.x	https://www.semanticscholar.org/paper/8895976ee134c0db6034014aad5165339199f240
Ambrose, B. A. | Smalls, T. L. | Zumajo-Cardona, C.	New York Botanical Garden, Bronx, Bronx, New York, USA.	All type II classic MADS-box genes in the lycophyte Selaginella moellendorffii are broadly yet discretely expressed in vegetative and reproductive tissues	All type II classic MADS-box genes in the lycophyte Selaginella moellendorffii are broadly yet discretely expressed in vegetative and reproductive tissues	2021	Animals	The MADS-box genes constitute a large transcription factor family that appear to have evolved by duplication and diversification of function. Two types of MADS-box genes are distinguished throughout eukaryotes, types I and II. Type II classic MADS-box genes, also known as MIKC-type, are key developmental regulators in flowering plants and are particularly well-studied for their role in floral org…	type II classic MADS-box genes, also known as MIKC-type, are key developmental regulators in flowering plants . they are particularly well-studied for their role in floral organ specification . but very little is known about the role that these genes might play outside of the flowering plant .	Evol Dev	23	3	215-230	1525-142X (Electronic)	10.1111/ede.12375	https://www.ncbi.nlm.nih.gov/pubmed/33666357
Andersson, C. R. | Helliwell, C. A. | Bagnall, D. J. | Hughes, T. P. | Finnegan, E. J. | Peacock, W. J. | Dennis, E. S.	CSIRO Plant Industry, GPO Box 1600, Canberra ACT 2601, Australia.	The FLX gene of Arabidopsis is required for FRI-dependent activation of FLC expression	The FLX gene of Arabidopsis is required for FRI-dependent activation of FLC expression	2008	Amino Acid Sequence	The Arabidopsis FLOWERING LOCUS C (FLC) gene encodes a MADS box protein that acts as a dose-dependent repressor of flowering. Mutants and ecotypes with elevated expression of FLC are late flowering and vernalization responsive. In this study we describe an early flowering mutant in the C24 ecotype, flc expressor (flx) , that has reduced expression of FLC. FLX encodes a protein of unknown function…	theArabidopsis FLOWERING LOCUS C(FLC) gene encodes a MADS box protein that acts as a dose-dependent repressor of flowering . mutants and ecotypes with elevated expression ofFLCare late flowering and vernalization responsive .	Plant Cell Physiol	49	2	191-200	1471-9053 (Electronic)	10.1093/pcp/pcm176	https://www.ncbi.nlm.nih.gov/pubmed/18156133
Andre, D. | Zambrano, J. A. | Zhang, B. | Lee, K. C. | Ruhl, M. | Marcon, A. | Nilsson, O.	Department of Forest Genetics and Plant Physiology, Umea Plant Science Centre, Swedish University of Agricultural Sciences, Umea, Sweden.	Populus SVL Acts in Leaves to Modulate the Timing of Growth Cessation and Bud Set	Populus SVL Acts in Leaves to Modulate the Timing of Growth Cessation and Bud Set	2022	Flowering locus t	SHORT VEGETATIVE PHASE (SVP) is an important regulator of FLOWERING LOCUS T (FT) in the thermosensory pathway of Arabidopsis. It is a negative regulator of flowering and represses FT transcription. In poplar trees, FT2 is central for the photoperiodic control of growth cessation, which also requires the decrease of bioactive gibberellins (GAs) . In angiosperm trees, genes similar to SVP, sometime…	p>italic>SHORT VEGETATIVE PHASE (SVL) is an important regulator of flowering . it is a negative regulator of FT in the thermosensory pathway of Arabidopsis . SVL is also contributing to the regulation of short day induced growth cessation and bud set .	Front Plant Sci	13		823019	1664-462X (Print)	10.3389/fpls.2022.823019	https://www.ncbi.nlm.nih.gov/pubmed/35251092
Angenent, G. C. | Franken, J. | Busscher, M. | van Dijken, A. | van Went, J. L. | Dons, H. J. | van Tunen, A. J.	Department of Developmental Biology, DLO-Centre for Plant Breeding and Reproduction Research, CPRO-DLO, Wageningen, The Netherlands.	A novel class of MADS box genes is involved in ovule development in petunia	A novel class of MADS box genes is involved in ovule development in petunia	1995	Amino Acid Sequence	We isolated and characterized two ovule-specific MADS box cDNAs from petunia, designated floral binding protein (fbp) genes 7 and 11. The putative protein products of these genes have approximately 90% of their overall amino acid sequence in common. In situ RNA hybridization experiments revealed that both genes are expressed in the center of the developing gynoecium before ovule primordia are vis…	two ovule-specific MADS box cDNAs were isolated from petunia . the putative protein products of these genes have approximately 90% of their amino acid sequence in common . hybridization experiments revealed that both genes are expressed in the center of the developing gynoecium .	Plant Cell	7	10	1569-82	1040-4651 (Print)	10.1105/tpc.7.10.1569	https://www.ncbi.nlm.nih.gov/pubmed/7580252
Aurin, M. B. | Haupt, M. | Gorlach, M. | Rumpler, F. | Theissen, G.	Matthias Schleiden Institute / Genetics, Friedrich Schiller University Jena, Philosophenweg 12, 07743 Jena, Germany.	Structural Requirements of the Phytoplasma Effector Protein SAP54 for Causing Homeotic Transformation of Floral Organs	Structural Requirements of the Phytoplasma Effector Protein SAP54 for Causing Homeotic Transformation of Floral Organs	2020	Bacterial Proteins/*chemistry/genetics	Phytoplasmas are intracellular bacterial plant pathogens that cause devastating diseases in crops and ornamental plants by the secretion of effector proteins. One of these effector proteins, termed SECRETED ASTER YELLOWS WITCHES' BROOM PROTEIN 54 (SAP54) , leads to the degradation of a specific subset of floral homeotic proteins of the MIKC-type MADS-domain family via the ubiquitin-proteasome pat…	phytoplasmas cause devastating diseases in crops and ornamental plants by the secretion of effector proteins . one effector protein, termed SECRETED ASTER YELLOWS WITCHES' BROOM PROTEIN 54, leads to degradation . molecular mechanism of SAP54 action involves binding to keratin-like domain of MIKC-type protein .	Mol Plant Microbe Interact	33	9	1129-1141	0894-0282 (Print)	10.1094/MPMI-02-20-0028-R	https://www.ncbi.nlm.nih.gov/pubmed/32689871
Avila de Dios, E. | Delaye, L. | Simpson, J.	Department of Genetic Engineering, Cinvestav Unidad Irapuato, Km. 9.6 Libramiento Norte Carretera Irapuato-Leon, Apdo. Postal 629, 36821, Irapuato, Guanajuato, Mexico.	Transcriptome analysis of bolting in A. tequilana reveals roles for florigen, MADS, fructans and gibberellins	Transcriptome analysis of bolting in A. tequilana reveals roles for florigen, MADS, fructans and gibberellins	2019	Agave/anatomy & histology/*genetics/*growth & development/metabolism	BACKGROUND: Reliable indicators for the onset of flowering are not available for most perennial monocarpic species, representing a drawback for crops such as bamboo, agave and banana. The ability to predict and control the transition to the reproductive stage in A. tequilana would represent an advantage for field management of agaves for tequila production and for the development of a laboratory …	reliable indicators for the onset of flowering are not available for most perennial monocarpic species . morphological features could not be determined for the vegetative to reproductive transition . changes in carbohydrate metabolism where sucrose decreased and fructans of higher degree of polymerization increased in leaves .	BMC Genomics	20	1	473	1471-2164 (Electronic)	10.1186/s12864-019-5808-9	https://www.ncbi.nlm.nih.gov/pubmed/31182030
Awan, S. A. | Khan, I. | Tariq, R. | Rizwan, M. | Wang, X. | Zhang, X. | Huang, L.	College of Grassland Science and Technology, Sichuan Agricultural University, Chengdu, China.	Genome-Wide Expression and Physiological Profiling of Pearl Millet Genotype Reveal the Biological Pathways and Various Gene Clusters Underlying Salt Resistance	Genome-Wide Expression and Physiological Profiling of Pearl Millet Genotype Reveal the Biological Pathways and Various Gene Clusters Underlying Salt Resistance	2022	mechanism	Pearl millet (Pennisetum glaucum L.) is a vital staple food and an important cereal crop used as food, feed, and forage. It can withstand heat and drought due to the presence of some unique genes; however, the mechanism of salt stress has been missing in pearl millet until now. Therefore, we conducted a comparative transcriptome profiling to reveal the differentially expressed transcripts (DETs) …	the mechanism of salt stress has been missing in pearl millet until now . salt stress significantly increased proline, malondialdehyde, and hydrogen peroxide . a comparative transcriptome profiling was conducted .	Front Plant Sci	13		849618	1664-462X (Print)	10.3389/fpls.2022.849618	https://www.ncbi.nlm.nih.gov/pubmed/35419021
Ayra, L. | Reyero-Saavedra, M. D. R. | Isidra-Arellano, M. C. | Lozano, L. | Ramirez, M. | Leija, A. | Fuentes, S. I. | Girard, L. | Valdes-Lopez, O. | Hernandez, G.	Programa de Genomica Funcional de Eukaryotes, Centro de Ciencias Genomicas, Universidad Nacional Autonoma de Mexico, Cuernavaca, Mexico.	Control of the Rhizobia Nitrogen-Fixing Symbiosis by Common Bean MADS-Domain/AGL Transcription Factors	Control of the Rhizobia Nitrogen-Fixing Symbiosis by Common Bean MADS-Domain/AGL Transcription Factors	2021	Agl	Plants MADS-domain/AGL proteins constitute a large transcription factor (TF) family that controls the development of almost every plant organ. We performed a phylogeny of (ca. 500) MADS-domain proteins from Arabidopsis and four legume species. We identified clades with Arabidopsis MADS-domain proteins known to participate in root development that grouped legume MADS-proteins with similar high exp…	plants MADS-domain/AGL proteins constitute a large transcription factor (TF) family that controls the development of almost every plant organ . clades with Arabidopsis MADS domain proteins known to participate in root development . group legume MADS proteins with similar high expression in roots and nodules .	Front Plant Sci	12		679463	1664-462X (Print)	10.3389/fpls.2021.679463	https://www.ncbi.nlm.nih.gov/pubmed/34163511
Babaei, S. | Bhalla, P. L. | Singh, M. B.	Plant Molecular Biology and Biotechnology Laboratory, School of Agriculture, Food and Ecosystem Sciences, The University of Melbourne, Melbourne, VIC, Australia.	Identifying long non-coding RNAs involved in heat stress response during wheat pollen development	Identifying long non-coding RNAs involved in heat stress response during wheat pollen development	2024	heat stress	INTRODUCTION: Wheat is a staple food crop for over one-third of the global population. However, the stability of wheat productivity is threatened by heat waves associated with climate change. Heat stress at the reproductive stage can result in pollen sterility and failure of grain development. METHODS: This study used transcriptome data analysis to explore the specific expression of long non-codi…	heat stress at the reproductive stage can result in pollen sterility and failure of grain development . this study identified 11,054 lncRNA-producing loci, of which 5,482 showed differential expression in response to heat stress .	Front Plant Sci	15		1344928	1664-462X (Print)	10.3389/fpls.2024.1344928	https://www.ncbi.nlm.nih.gov/pubmed/38379952
Backhaus, A. E. | Lister, A. | Tomkins, M. | Adamski, N. M. | Simmonds, J. | Macaulay, I. | Morris, R. J. | Haerty, W. | Uauy, C.	John Innes Centre, Norwich Research Park, Norwich NR4 7UH, UK.	High expression of the MADS-box gene VRT2 increases the number of rudimentary basal spikelets in wheat	High expression of the MADS-box gene VRT2 increases the number of rudimentary basal spikelets in wheat	2022	Edible Grain	Spikelets are the fundamental building blocks of Poaceae inflorescences, and their development and branching patterns determine the various inflorescence architectures and grain yield of grasses. In wheat (Triticum aestivum) , the central spikelets produce the most and largest grains, while spikelet size gradually decreases acropetally and basipetally, giving rise to the characteristic lanceolate…	in wheat, central spikelets produce the most and largest grains . basal spikelets are developed first, and the cause of their small size and rudimentary development is unclear . a low-input transcriptomics approach was used to characterize gene expression profiles .	Plant Physiol	189	3	1536-1552	1532-2548 (Electronic)	10.1093/plphys/kiac156	https://www.ncbi.nlm.nih.gov/pubmed/35377414
Bacovsky, V. | Cegan, R. | Tihlarikova, E. | Nedela, V. | Hudzieczek, V. | Smrza, L. | Janicek, T. | Benes, V. | Hobza, R.	Department of Plant Developmental Genetics, Institute of Biophysics of the Czech Academy of Sciences, Kralovopolska 135, 612 65 Brno, Czech Republic.	Chemical genetics in Silene latifolia elucidate regulatory pathways involved in gynoecium development	Chemical genetics in Silene latifolia elucidate regulatory pathways involved in gynoecium development	2022	Flowers/genetics	Dioecious plants possess diverse sex determination systems and unique mechanisms of reproductive organ development; however, little is known about how sex-linked genes shape the expression of regulatory cascades that lead to developmental differences between sexes. In Silene latifolia, a dioecious plant with stable dimorphism in floral traits, early experiments suggested that female-regulator gen…	early experiments suggested that female-regulator genes act on factors that determine the boundaries of the flower whorls . eight candidates were found to have a positive role in gynoecium promotion and floral organ size .	J Exp Bot	73	8	2354-2368	1460-2431 (Electronic)	10.1093/jxb/erab538	https://www.ncbi.nlm.nih.gov/pubmed/35045170
Bannoud, F. | Carvajal, S. | Ellison, S. | Senalik, D. | Gomez Talquenca, S. | Iorizzo, M. | Simon, P. W. | Cavagnaro, P. F.	Consejo Nacional de Investigaciones Cientificas y Tecnicas (CONICET) , Av. Rivadavia 1917, Buenos Aires C1033, Argentina.	Genetic and Transcription Profile Analysis of Tissue-Specific Anthocyanin Pigmentation in Carrot Root Phloem	Genetic and Transcription Profile Analysis of Tissue-Specific Anthocyanin Pigmentation in Carrot Root Phloem	2021	Anthocyanins/*metabolism	In purple carrots, anthocyanin pigmentation can be expressed in the entire root, or it can display tissue specific-patterns. Within the phloem, purple pigmentation can be found in the outer phloem (OP) (also called the cortex) and inner phloem (IP) , or it can be confined exclusively to the OP. In this work, the genetic control underlying tissue-specific anthocyanin pigmentation in the carrot roo…	purple pigmentation can be expressed in the entire root, or it can display tissue specific-patterns . it can be found in the outer phloem (OP) (also called the cortex) and inner phenomenon (IP) . the genetic control underlying tissue-specific anthocyanin pigmentation was investigated by means of linkage mapping and transcriptome .	Genes (Basel)	12	10		2073-4425 (Electronic)	10.3390/genes12101464	https://www.ncbi.nlm.nih.gov/pubmed/34680859
Bar-Lev, Y. | Senden, E. | Pasmanik-Chor, M. | Sapir, Y.	The Botanical Garden, School of Plant Sciences and Food Security, G.S. Wise Faculty of Life Science, Tel Aviv University, Tel Aviv, Israel. abargily@tauex.tau.ac.il.	De novo transcriptome characterization of Iris atropurpurea (the Royal Iris) and phylogenetic analysis of MADS-box and R2R3-MYB gene families	De novo transcriptome characterization of Iris atropurpurea (the Royal Iris) and phylogenetic analysis of MADS-box and R2R3-MYB gene families	2021	Flowers/genetics/growth & development/metabolism	The Royal Irises (section Oncocyclus) are a Middle-Eastern group of irises, characterized by extremely large flowers with a huge range of flower colors and a unique pollination system. The Royal Irises are considered to be in the course of speciation and serve as a model for evolutionary processes of speciation and pollination ecology. However, no transcriptomic and genomic data are available for…	the Royal Irises are considered to be in the course of speciation . no transcriptomic and genomic data are available for these plants . transcriptome sequencing is a valuable resource for determining ecological-meaningful traits .	Sci Rep	11	1	16246	2045-2322 (Electronic)	10.1038/s41598-021-95085-5	https://www.ncbi.nlm.nih.gov/pubmed/34376711
Barcaccia, G. | Palumbo, F. | Scariolo, F. | Vannozzi, A. | Borin, M. | Bona, S.	DAFNAE-Department of Agronomy, Food, Natural Resources, Animals and Environment, University of Padova, Campus of Agripolis, Legnaro, Italy.	Potentials and Challenges of Genomics for Breeding Cannabis Cultivars	Potentials and Challenges of Genomics for Breeding Cannabis Cultivars	2020	Cannabis sativa, breeding methods	Cannabis (Cannabis sativa L.) is an influential yet controversial agricultural plant with a very long and prominent history of recreational, medicinal, and industrial usages. Given the importance of this species, we deepened some of the main challenges-along with potential solutions-behind the breeding of new cannabis cultivars. One of the main issues that should be fixed before starting new bree…	italic>Cannabis sativa" is an influential yet controversial agricultural plant . a unique species system is based on two subspecies, p>cannabis" a new breeding scheme is proposed for the constitution of hybrids .	Front Plant Sci	11		573299	1664-462X (Print)	10.3389/fpls.2020.573299	https://www.ncbi.nlm.nih.gov/pubmed/33101342
Barker, E. I. | Ashton, N. W.	Department of Biology, University of Regina, Regina, SK, S4S 0A2, Canada.	A parsimonious model of lineage-specific expansion of MADS-box genes in Physcomitrella patens	A parsimonious model of lineage-specific expansion of MADS-box genes in Physcomitrella patens	2013	Amino Acid Sequence	The MADS-box gene family expanded in the lineage leading to the moss, Physcomitrella patens , mainly as a result of polyploidisations and/or large-scale segmental duplication events and to a lesser extent by tandem duplications. Plant MADS-box genes comprise a large family best known for the roles of type II MIKC (C) genes in floral organogenesis, but also including type II MIKC* genes, some of w…	the MADS-box gene family expanded in the lineage leading to the moss, Physcomitrella patens . mainly as a result of polyploidisations and/or large-scale segmental duplication events .	Plant Cell Rep	32	8	1161-77	1432-203X (Electronic)	10.1007/s00299-013-1411-8	https://www.ncbi.nlm.nih.gov/pubmed/23525745
Bartlett, M. | Thompson, B. | Brabazon, H. | Del Gizzi, R. | Zhang, T. | Whipple, C.	Department of Biology, University of Massachusetts Amherst Department of Biology, Brigham Young University mbartlett@bio.umass.edu whipple@byu.edu.	Evolutionary Dynamics of Floral Homeotic Transcription Factor Protein-Protein Interactions	Evolutionary Dynamics of Floral Homeotic Transcription Factor Protein-Protein Interactions	2016	Amino Acid Sequence	Protein-protein interactions (PPIs) have widely acknowledged roles in the regulation of development, but few studies have addressed the timing and mechanism of shifting PPIs over evolutionary history. The B-class MADS-box transcription factors, PISTILLATA (PI) and APETALA3 (AP3) are key regulators of floral development. PI-like (PI (L) ) and AP3-like (AP3 (L) ) proteins from a number of plants, i…	proteinÐprotein interactions (PPIs) are key regulators of floral development . few studies have addressed the timing and mechanism of shifting PPIs . ectopic expression of aJoinvilleaPILhomodimer in arabidopsis can homeotically transform sepals into petals .	Mol Biol Evol	33	6	1486-501	1537-1719 (Electronic)	10.1093/molbev/msw031	https://www.ncbi.nlm.nih.gov/pubmed/26908583
Batista, R. A. | Moreno-Romero, J. | Qiu, Y. | van Boven, J. | Santos-Gonzalez, J. | Figueiredo, D. D. | Kohler, C.	Department of Plant Biology, Uppsala BioCenter, Swedish University of Agricultural Sciences, Uppsala, Sweden.	The MADS-box transcription factor PHERES1 controls imprinting in the endosperm by binding to domesticated transposons	The MADS-box transcription factor PHERES1 controls imprinting in the endosperm by binding to domesticated transposons	2019	Amino Acid Motifs	MADS-box transcription factors (TFs) are ubiquitous in eukaryotic organisms and play major roles during plant development. Nevertheless, their function in seed development remains largely unknown. Here, we show that the imprinted Arabidopsis thaliana MADS-box TF PHERES1 (PHE1) is a master regulator of paternally expressed imprinted genes, as well as of non-imprinted key regulators of endosperm de…	the imprinted Arabidopsis thaliana MADS-box TF PHERES1 is a master regulator . binding sites show distinct epigenetic modifications on maternal and paternal alleles . the CArG-box-like DNA-binding motifs bound by PHE1 have been distributed by RC/Helitron .	Elife	8			2050-084X (Electronic)	10.7554/eLife.50541	https://www.ncbi.nlm.nih.gov/pubmed/31789592
Becker, A. | Theissen, G.	Lehrstuhl fur Genetik, Friedrich-Schiller-Universitat Jena, Philosophenweg 12, D-07743 Jena, Germany.	The major clades of MADS-box genes and their role in the development and evolution of flowering plants	The major clades of MADS-box genes and their role in the development and evolution of flowering plants	2003	Arabidopsis/genetics	MADS-box genes encode a family of transcription factors which control diverse developmental processes in flowering plants ranging from root to flower and fruit development. Sequencing of (almost) the complete Arabidopsis genome enabled the identification of (almost) all of the Arabidopsis MADS-box genes. MADS-box genes have been divided in two large groups, termed type I and type II genes. The ty…	the majority of MIKC-type genes are of the MIKC c -type . this includes all plant MADS-box genes for which expression patterns or mutant phenotypes are known . 7 of the 12 major gene clades, i.e., AG -, AGL6 - and AGL12 - existed already in the most recent common ancestor of angiosperms and gymnosperms about 300 MYA .	Mol Phylogenet Evol	29	3	464-89	1055-7903 (Print)	10.1016/s1055-7903(03)00207-0	https://www.ncbi.nlm.nih.gov/pubmed/14615187
Becker, A. | Winter, K. U. | Meyer, B. | Saedler, H. | Theissen, G.	Max-Planck-Institut fur Zuchtungsforschung, Abteilung Molekulare Pflanzengenetik, Koln, Germany.	MADS-Box gene diversity in seed plants 300 million years ago	MADS-Box gene diversity in seed plants 300 million years ago	2000	Amino Acid Sequence	MADS-box genes encode a family of transcription factors which control diverse developmental processes in flowering plants ranging from root development to flower and fruit development. Through phylogeny reconstructions, most of these genes can be subdivided into defined monophyletic gene clades whose members share similar expression patterns and functions. Therefore, the establishment of the dive…	the establishment of the diversity of gene clades was probably an important event in land plant evolution . phylogeny reconstructions reveal a diversity of patterns that has been largely conserved since the time when the angiosperm and gymnosperm lineages separated .	Mol Biol Evol	17	10	1425-34	0737-4038 (Print)	10.1093/oxfordjournals.molbev.a026243	https://www.ncbi.nlm.nih.gov/pubmed/11018150
Bemer, M. | Heijmans, K. | Airoldi, C. | Davies, B. | Angenent, G. C.	Department of Plant Cell Biology, Radboud University Nijmegen, Nijmegen, The Netherlands.	An atlas of type I MADS box gene expression during female gametophyte and seed development in Arabidopsis	An atlas of type I MADS box gene expression during female gametophyte and seed development in Arabidopsis	2010	Arabidopsis/cytology/*genetics/*growth & development	Members of the plant type I MADS domain subfamily have been reported to be involved in reproductive development in Arabidopsis (Arabidopsis thaliana) . However, from the 61 type I genes in the Arabidopsis genome, only PHERES1, AGAMOUS-LIKE80 (AGL80) , DIANA, AGL62, and AGL23 have been functionally characterized, which revealed important roles for these genes during female gametophyte and early se…	members of type I MADS domain subfamily reported to be involved in reproductive development . onlyPHERES1,AGAMOUS-LIKE80(AGL80),DIANA,AGL62, andAGL23 have been functionally characterized . lack of mutant phenotypes likely due to recent intrachromosomal duplications in type I subfamily .	Plant Physiol	154	1	287-300	1532-2548 (Electronic)	10.1104/pp.110.160770	https://www.ncbi.nlm.nih.gov/pubmed/20631316
Benaouda, S. | Stocker, T. | Schoof, H. | Leon, J. | Ballvora, A.	Institute for Crop Science and Resource Conservation, Chair of Plant Breeding, University of Bonn, Bonn, Germany.	Transcriptome profiling at the transition to the reproductive stage uncovers stage and tissue-specific genes in wheat	Transcriptome profiling at the transition to the reproductive stage uncovers stage and tissue-specific genes in wheat	2023	*Arabidopsis Proteins/genetics	BACKGROUND: The transition from vegetative to floral phase is the result of complex crosstalk of exogenous and endogenous floral integrators. This critical physiological event is the response to environmental interaction, which causes biochemical cascades of reactions at different internal tissues, organs, and releases signals that make the plant moves from vegetative status to a reproductive pha…	the transition from vegetative to floral phase is the result of crosstalk of exogenous and endogenous floral integrators . the network controlling flowering time is not deciphered largely in bread wheat . two winter cultivars that have been bred in germany were selected for the analysis .	BMC Plant Biol	23	1	25	1471-2229 (Electronic)	10.1186/s12870-022-03986-y	https://www.ncbi.nlm.nih.gov/pubmed/36631761
Beydler, B. | Osadchuk, K. | Cheng, C. L. | Manak, J. R. | Irish, E. E.	Department of Biology, University of Iowa, Iowa City, Iowa 52242.	The Juvenile Phase of Maize Sees Upregulation of Stress-Response Genes and Is Extended by Exogenous Jasmonic Acid	The Juvenile Phase of Maize Sees Upregulation of Stress-Response Genes and Is Extended by Exogenous Jasmonic Acid	2016	Cluster Analysis	As maize (Zea mays) plants undergo vegetative phase change from juvenile to adult, they both exhibit heteroblasty, an abrupt change in patterns of leaf morphogenesis, and gain the ability to produce flowers. Both processes are under the control of microRNA156 (miR156) , whose levels decline at the end of the juvenile phase. Gain of the ability to flower is conferred by the expression of miR156 ta…	as maize plants undergo vegetative phase change from juvenile to adult, they both exhibit heteroblasty . how gene expression differs between the two phases remains an open question . stress associated with germination promotes juvenile patterns of differentiation .	Plant Physiol	171	4	2648-58	1532-2548 (Electronic)	10.1104/pp.15.01707	https://www.ncbi.nlm.nih.gov/pubmed/27307257
Bjerkan, K. N. | Alling, R. M. | Myking, I. V. | Brysting, A. K. | Grini, P. E.	Section for Genetics and Evolutionary Biology (EVOGENE) , Department of Biosciences, University of Oslo, Oslo, Norway.	Genetic and environmental manipulation of Arabidopsis hybridization barriers uncovers antagonistic functions in endosperm cellularization	Genetic and environmental manipulation of Arabidopsis hybridization barriers uncovers antagonistic functions in endosperm cellularization	2023	A. arenosa	Speciation involves reproductive isolation, which can occur by hybridization barriers acting in the endosperm of the developing seed. The nuclear endosperm is a nutrient sink, accumulating sugars from surrounding tissues, and undergoes coordinated cellularization, switching to serve as a nutrient source for the developing embryo. Tight regulation of cellularization is therefore vital for seed and…	hybrid seeds from crosses result in an endosperm based post-zygotic hybridization barrier . a temperature gradient leads to diametrically opposed cellularization phenotype responses . loss of AGAMOUS-LIKE 35 significantly affects the germination rate of hybrid seeds .	Front Plant Sci	14		1229060	1664-462X (Print)	10.3389/fpls.2023.1229060	https://www.ncbi.nlm.nih.gov/pubmed/37600172
Boora, N. | Verma, V. | Khurana, R. | Gawande, G. | Bhimrajka, S. | Chaprana, K. | Kapoor, M. | Kapoor, S.	Interdisciplinary Centre for Plant Genomics, Department of Plant Molecular Biology, University of Delhi South Campus.	Determination of Tripartite Interaction between Two Monomers of a MADS-box Transcription Factor and a Calcium Sensor Protein by BiFC-FRET-FLIM Assay	Determination of Tripartite Interaction between Two Monomers of a MADS-box Transcription Factor and a Calcium Sensor Protein by BiFC-FRET-FLIM Assay	2021	Calcium/metabolism	Protein-protein interactions are an integral part of all biological processes in the cells as they play a crucial role in regulating, maintaining, and amending cellular functions. These interactions are involved in a wide range of phenomena such as signal transduction, pathogen response, cell-cell interactions, metabolic and developmental processes. In the case of transcription factors, these int…	protein-protein interactions are an integral part of all biological processes in the cells . they play a crucial role in regulating, maintaining, and amending cellular functions . here, we demonstrate a methodology to visualize in vivo tripartite interaction .	J Vis Exp	178	178		1940-087X (Electronic)	10.3791/62791	https://www.ncbi.nlm.nih.gov/pubmed/35001908
Bramsiepe, J. | Krabberod, A. K. | Bjerkan, K. N. | Alling, R. M. | Johannessen, I. M. | Hornslien, K. S. | Miller, J. R. | Brysting, A. K. | Grini, P. E.	Section for Genetics and Evolutionary Biology, Department of Biosciences, University of Oslo, 0316, Oslo, Norway.	Structural evidence for MADS-box type I family expansion seen in new assemblies of Arabidopsis arenosa and A. lyrata	Structural evidence for MADS-box type I family expansion seen in new assemblies of Arabidopsis arenosa and A. lyrata	2023	*Arabidopsis/genetics/metabolism	Arabidopsis thaliana diverged from A. arenosa and A. lyrata at least 6 million years ago. The three species differ by genome-wide polymorphisms and morphological traits. The species are to a high degree reproductively isolated, but hybridization barriers are incomplete. A special type of hybridization barrier is based on the triploid endosperm of the seed, where embryo lethality is caused by endo…	Arabidopsis thaliana diverged from A. arenosa and A. lyrata at least 6 million years ago . the species are reproductively isolated, but hybridization barriers are incomplete . a special type of hybridization barrier is based on the triploid endosperm of the seed .	Plant J	116	3	942-961	1365-313X (Electronic)	10.1111/tpj.16401	https://www.ncbi.nlm.nih.gov/pubmed/37517071
Brazel, A. J. | Fattorini, R. | McCarthy, J. | Franzen, R. | Rumpler, F. | Coupland, G. | O'Maoileidigh, D. S.	Department of Biology, Maynooth University, Ireland.	AGAMOUS mediates timing of guard cell formation during gynoecium development	AGAMOUS mediates timing of guard cell formation during gynoecium development	2023	*Arabidopsis Proteins/genetics/metabolism	In Arabidopsis thaliana, stomata are composed of two guard cells that control the aperture of a central pore to facilitate gas exchange between the plant and its environment, which is particularly important during photosynthesis. Although leaves are the primary photosynthetic organs of flowering plants, floral organs are also photosynthetically active. In the Brassicaceae, evidence suggests that …	in Arabidopsis thaliana, stomata control the aperture of a central pore . evidence suggests that silique photosynthesis is important for optimal seed oil content . a group of transcription factors containing MADS DNA binding domains is necessary .	PLoS Genet	19	10	e1011000	1553-7404 (Electronic)	10.1371/journal.pgen.1011000	https://www.ncbi.nlm.nih.gov/pubmed/37819989
Broholm, S. K. | Pollanen, E. | Ruokolainen, S. | Tahtiharju, S. | Kotilainen, M. | Albert, V. A. | Elomaa, P. | Teeri, T. H.	Department of Applied Biology, PO Box 27, University of Helsinki, FIN-00014 Finland.	Functional characterization of B class MADS-box transcription factors in Gerbera hybrida	Functional characterization of B class MADS-box transcription factors in Gerbera hybrida	2010	Asteraceae/genetics/*metabolism	According to the classical ABC model, B-function genes are involved in determining petal and stamen development. Most core eudicot species have B class genes belonging to three different lineages: the PI, euAP3, and TM6 lineages, although both Arabidopsis and Antirrhinum appear to have lost their TM6-like gene. Functional studies were performed for three gerbera (Gerbera hybrida) B class MADS-box…	most core eudicot species have B class genes belonging to three different lineages . functional studies were performed for three gerbera (Gerbera hybrida) B class MADS-box genes .	J Exp Bot	61	1	75-85	1460-2431 (Electronic)	10.1093/jxb/erp279	https://www.ncbi.nlm.nih.gov/pubmed/19767305
Burgeff, C. | Liljegren, S. J. | Tapia-Lopez, R. | Yanofsky, M. F. | Alvarez-Buylla, E. R.	Instituto de Ecologia, UNAM, Mexico DF, Mexico.	MADS-box gene expression in lateral primordia, meristems and differentiated tissues of Arabidopsis thaliana roots	MADS-box gene expression in lateral primordia, meristems and differentiated tissues of Arabidopsis thaliana roots	2002	Arabidopsis/*genetics/growth & development	Although MADS-box genes involved in flower and fruit development have been well characterized, the function of MADS-box genes expressed in vegetative structures has yet to be explored. At least seven members of this family are grouped in clades of genes that are preferentially expressed in roots of Arabidopsis thaliana (L.) Heynh.. We report here the cloning of the AGL21 MADS-box gene, which belo…	the function of MADS-box genes expressed in vegetative structures has yet to be explored . at least seven members of this family are grouped in clades of genes that are preferentially expressed in roots of Arabidopsis thaliana (L.) Heynh.	Planta	214	3	365-72	0032-0935 (Print)	10.1007/s004250100637	https://www.ncbi.nlm.nih.gov/pubmed/11855641
Busconi, M. | Wischnitzki, E. | Del Corvo, M. | Colli, L. | Soffritti, G. | Stagnati, L. | Fluch, S. | Sehr, E. M. | de Los Mozos Pascual, M. | Fernandez, J. A.	Faculty of Agriculture, Food and Environmental Sciences, Research Centre BioDNA, Universita Cattolica del Sacro Cuore, Piacenza, Italy.	Epigenetic Variability Among Saffron Crocus (Crocus sativus L.) Accessions Characterized by Different Phenotypes	Epigenetic Variability Among Saffron Crocus (Crocus sativus L.) Accessions Characterized by Different Phenotypes	2021	Crocus sativus	This work represents the first epigenomic study carried out on saffron crocus. Five accessions of saffron, showing differences in tepal pigmentation, yield of saffron and flowering time, were analyzed at the epigenetic level by applying a methylation-sensitive restriction enzyme-sequencing (MRE-seq) approach. Five accession-specific hypomethylomes plus a reference hypomethylome, generated by comb…	five accessions showed differences in tepal pigmentation, yield of saffron and flowering time . comparison of the hypomethylomes revealed many differentially methylated regions . transcription factors involved in flowering process (MADS-box and TFL) and for the production of pigments (MYB)	Front Plant Sci	12		642631	1664-462X (Print)	10.3389/fpls.2021.642631	https://www.ncbi.nlm.nih.gov/pubmed/33747022
Busov, V. B.	School of Forest Resources and Environmental Science, Michigan Technological University, Houghton, MI 49931, USA. Electronic address: vbusov@mtu.edu.	Plant Development: Dual Roles of Poplar SVL in Vegetative Bud Dormancy	Plant Development: Dual Roles of Poplar SVL in Vegetative Bud Dormancy	2019	Gene Expression Regulation, Plant	Vegetative bud dormancy is an important adaptive process allowing survival over winter in trees from temperate and boreal regions. A recent discovery implicates a MADS-box transcription factor from poplar in regulation of both entry and release from dormancy.	bud dormancy is an important adaptive process allowing survival over winter in trees from temperate and boreal regions . a recent discovery implicates a MADS-box transcription factor from poplar in regulation of both entry and release .	Curr Biol	29	2	R68-R70	1879-0445 (Electronic)	10.1016/j.cub.2018.11.061	https://www.ncbi.nlm.nih.gov/pubmed/30668953
Cai, Y. | Wang, L. | Ogutu, C. O. | Yang, Q. | Luo, B. | Liao, L. | Zheng, B. | Zhang, R. | Han, Y.	CAS Key Laboratory of Plant Germplasm Enhancement and Specialty Agriculture, Wuhan Botanical Garden, The Innovative Academy of Seed Design, Chinese Academy of Sciences, Wuhan, China.	The MADS-box gene PpPI is a key regulator of the double-flower trait in peach (Prunus persica)	The MADS-box gene PpPI is a key regulator of the double-flower trait in peach (Prunus persica)	2021	Flowers/genetics/metabolism	Double flower is an invaluable trait in ornamental peach (Prunus persica) , but the mechanism underlying its development remains largely unknown. Here, we report the roles of ABCE model genes in double flower development in peach (Prunus persica) . A total of nine ABCE regulatory genes, including eight MADS-box genes and one AP2/EREBP gene, were identified in the peach (Prunus persica) genome. Su…	double flower is an invaluable trait in ornamental peach . the mechanism underlying its development remains largely unknown . four genes showed a difference in expression levels between single and double flowers .	Physiol Plant	173	4	2119-2129	1399-3054 (Electronic)	10.1111/ppl.13561	https://www.ncbi.nlm.nih.gov/pubmed/34537956
Caicedo, A. L. | Richards, C. | Ehrenreich, I. M. | Purugganan, M. D.	Biology Department, 221 Morrill Science Center, University of Massachusetts, USA.	Complex rearrangements lead to novel chimeric gene fusion polymorphisms at the Arabidopsis thaliana MAF2-5 flowering time gene cluster	Complex rearrangements lead to novel chimeric gene fusion polymorphisms at the Arabidopsis thaliana MAF2-5 flowering time gene cluster	2009	Arabidopsis/genetics	Tandem gene clusters of multigene families are rearrangement hotspots and may be a major source of novel gene formation. Here, we report on a molecular population genetic analysis of the MAF2-5 gene cluster of the model plant species, Arabidopsis thaliana. The MAF2-5 genes are a MADS-box multigene family cluster spanning approximately 24 kbp on chromosome 5. We find heterogeneous evolutionary dyn…	theMAF2-5genes are a MADS-box multigene family cluster spanning 24 kbp on chromosome 5 . low levels of nonsynonymous single nucleotide polymorphism (SNP) observed forMAF4andMAF5suggest purifying selection and conservation of function .	Mol Biol Evol	26	3	699-711	1537-1719 (Electronic)	10.1093/molbev/msn300	https://www.ncbi.nlm.nih.gov/pubmed/19139056
Calle, A. | Grimplet, J. | Le Dantec, L. | Wunsch, A.	Unidad de Hortofruticultura, Centro de Investigacion y Tecnologia Agroalimentaria de Aragon, Zaragoza, Spain.	Identification and Characterization of DAMs Mutations Associated With Early Blooming in Sweet Cherry, and Validation of DNA-Based Markers for Selection	Identification and Characterization of DAMs Mutations Associated With Early Blooming in Sweet Cherry, and Validation of DNA-Based Markers for Selection	2021	DAMs	Dormancy release and bloom time of sweet cherry cultivars depend on the environment and the genotype. The knowledge of these traits is essential for cultivar adaptation to different growing areas, and to ensure fruit set in the current climate change scenario. In this work, the major sweet cherry bloom time QTL qP-BT1.1 (m) (327 Kbs; Chromosome 1) was scanned for candidate genes in the Regina cv …	six MADS-box genes were identified as candidate genes for bloom time regulation . high protein sequence conservation (98.8Ð100%) was observed . a large deletion (694 bp) upstream of italic>PavDAM1 was identified . structural mutations in ÔCristobalinaÕ correlated with low-chilling and extra-early blooming .	Front Plant Sci	12		621491	1664-462X (Print)	10.3389/fpls.2021.621491	https://www.ncbi.nlm.nih.gov/pubmed/34305957
Calonje, M. | Cubas, P. | Martinez-Zapater, J. M. | Carmona, M. J.	Departamento de Biotecnologia, Escuela Tecnica Superior Ingenieros Agronomos, Universidad Politecnica de Madrid, 28040 Madrid, Spain.	Floral meristem identity genes are expressed during tendril development in grapevine	Floral meristem identity genes are expressed during tendril development in grapevine	2004	Amino Acid Sequence	To study the early steps of flower initiation and development in grapevine (grapes; Vitis vinifera) , we have isolated two MADS-box genes, VFUL-L and VAP1, the putative FUL-like and AP1 grapevine orthologs, and analyzed their expression patterns during vegetative and reproductive development. Both genes are expressed in lateral meristems that, in grapevine, can give rise to either inflorescences …	two genes are expressed in lateral meristems that can give rise to either inflorescences or tendrils . VFUL-L transcripts are restricted to the central part of young flower merstems . expression pattern of VAP1 suggests it may play a role in flowering transition and flower development .	Plant Physiol	135	3	1491-501	0032-0889 (Print)	10.1104/pp.104.040832	https://www.ncbi.nlm.nih.gov/pubmed/15247405
Canton, M. | Forestan, C. | Bonghi, C. | Varotto, S.	Department of Agriculture, Food, Natural resources, Animals and Environment (DAFNAE) , University of Padua, Agripolis, Viale dell'Universita, 16, 35020, Legnaro, PD, Italy.	Meta-analysis of RNA-Seq studies reveals genes with dominant functions during flower bud endo- to eco-dormancy transition in Prunus species	Meta-analysis of RNA-Seq studies reveals genes with dominant functions during flower bud endo- to eco-dormancy transition in Prunus species	2021	Epigenesis, Genetic	In deciduous fruit trees, entrance into dormancy occurs in later summer/fall, concomitantly with the shortening of day length and decrease in temperature. Dormancy can be divided into endodormancy, ecodormancy and paradormancy. In Prunus species flower buds, entrance into the dormant stage occurs when the apical meristem is partially differentiated; during dormancy, flower verticils continue thei…	dormancy can be divided into endodormancy, ecodormancy and paradormancy . a meta-analysis of transcriptomic studies on flower buds of sweet cherry, apricot and peach was conducted . conserved and distinctive expression patterns were observed .	Sci Rep	11	1	13173	2045-2322 (Electronic)	10.1038/s41598-021-92600-6	https://www.ncbi.nlm.nih.gov/pubmed/34162991
Carlsbecker, A. | Tandre, K. | Johanson, U. | Englund, M. | Engstrom, P.	Department of Physiological Botany, Evolutionary Biology Center, Uppsala University, Villavagen 6, SE-752 36 Uppsala, Sweden.	The MADS-box gene DAL1 is a potential mediator of the juvenile-to-adult transition in Norway spruce (Picea abies)	The MADS-box gene DAL1 is a potential mediator of the juvenile-to-adult transition in Norway spruce (Picea abies)	2004	Arabidopsis/genetics/metabolism	Progression through the plant life cycle involves change in many essential features, most notably in the capacity to reproduce. The transition from a juvenile vegetative and non-reproductive to an adult reproductive phase is gradual and can take many years; in the conifer Norway spruce, Picea abies, typically 20-25 years. We present a detailed analysis of the activities of three regulatory genes …	the transition from a juvenile vegetative and non-reproductive to an adult reproductive phase is gradual . in the conifer Norway spruce, Picea abies , typically 20â25 years . we present a detailed analysis of the activities of three regulatory genes with potential roles in this transition .	Plant J	40	4	546-57	0960-7412 (Print)	10.1111/j.1365-313X.2004.02226.x	https://www.ncbi.nlm.nih.gov/pubmed/15500470
Carmona, M. J. | Ortega, N. | Garcia-Maroto, F.	Departamento de Biotecnologia, E.T.S. Ingenieros Agronomos, Madrid, Spain.	Isolation and molecular characterization of a new vegetative MADS-box gene from Solanum tuberosum L	Isolation and molecular characterization of a new vegetative MADS-box gene from Solanum tuberosum L	1998	Amino Acid Sequence	A cDNA clone, STMADS11, encoding a new MADS-box protein was isolated from Solanum tuberosum L. (potato) . Expression of STMADS11 was found in all vegetative organs of the plant, but not in floral tissues. The expression was also detected in all developmental stages, from tuber sprouts to mature plants, reaching a maximum in well-developed organs. However, the level of STMADS11 mRNA was low in tis…	cDNA clone, STMADS11, encoding a new MADS-box protein is isolated from potato . expression of the protein was found in all vegetative organs of the plant, but not in floral tissues . mRNA levels were low in tissues such as resting tuber or sprouts developed in the cold .	Planta	207	2	181-8	0032-0935 (Print)	10.1007/s004250050471	https://www.ncbi.nlm.nih.gov/pubmed/9951721
Castelan-Munoz, N. | Herrera, J. | Cajero-Sanchez, W. | Arrizubieta, M. | Trejo, C. | Garcia-Ponce, B. | Sanchez, M. P. | Alvarez-Buylla, E. R. | Garay-Arroyo, A.	Laboratorio de Genetica Molecular, Epigenetica y Desarrollo de Plantas, Instituto de Ecologia, Universidad Nacional Autonoma de Mexico, Mexico City, Mexico.	MADS-Box Genes Are Key Components of Genetic Regulatory Networks Involved in Abiotic Stress and Plastic Developmental Responses in Plants	MADS-Box Genes Are Key Components of Genetic Regulatory Networks Involved in Abiotic Stress and Plastic Developmental Responses in Plants	2019	MADS-box genes	Plants, as sessile organisms, adapt to different stressful conditions, such as drought, salinity, extreme temperatures, and nutrient deficiency, via plastic developmental and growth responses. Depending on the intensity and the developmental phase in which it is imposed, a stress condition may lead to a broad range of responses at the morphological, physiological, biochemical, and molecular level…	a stress condition may lead to a broad range of responses at the cellular level . several studies have started to identify members of the MADS-box gene family . but we still lack an integrated view of their role in these processes .	Front Plant Sci	10		853	1664-462X (Print)	10.3389/fpls.2019.00853	https://www.ncbi.nlm.nih.gov/pubmed/31354752
Castillo, M. C. | Forment, J. | Gadea, J. | Carrasco, J. L. | Juarez, J. | Navarro, L. | Ancillo, G.	Centro de Proteccion Vegetal y Biotecnologia, Instituto Valenciano de Investigaciones Agrarias (IVIA) , Carretera Moncada-Naquera, Km. 4.5, 46113 Moncada (Valencia) , Spain.	Identification of transcription factors potentially involved in the juvenile to adult phase transition in Citrus	Identification of transcription factors potentially involved in the juvenile to adult phase transition in Citrus	2013	Citrus/genetics/*growth & development/*metabolism	BACKGROUND AND AIMS: The juvenile to adult transition (JAT) in higher plants is required for them to reach reproductive competence. However, it is a poorly understood process in woody plants, where only a few genes have been definitely identified as being involved in this transition. This work aims at increasing our understanding of the mechanisms regulating the JAT in citrus. METHODS: Juvenile a…	the juvenile to adult transition (JAT) in higher plants is required for them to reach reproductive competence . only a few genes have been definitely identified as being involved in this transition . a browsable web database has been created with information about the structural and functional annotation .	Ann Bot	112	7	1371-81	1095-8290 (Electronic)	10.1093/aob/mct211	https://www.ncbi.nlm.nih.gov/pubmed/24052558
Cerise, M. | da Silveira Falavigna, V. | Rodriguez-Maroto, G. | Signol, A. | Severing, E. | Gao, H. | van Driel, A. | Vincent, C. | Wilkens, S. | Iacobini, F. R. | Formosa-Jordan, P. | Pajoro, A. | Coupland, G.	Department of Plant Developmental Biology, Max Planck Institute for Plant Breeding Research, Cologne 50829, Germany.	Two modes of gene regulation by TFL1 mediate its dual function in flowering time and shoot determinacy of Arabidopsis	Two modes of gene regulation by TFL1 mediate its dual function in flowering time and shoot determinacy of Arabidopsis	2023	*Arabidopsis/metabolism	Plant organ primordia develop successively at the shoot apical meristem (SAM) . In Arabidopsis, primordia formed early in development differentiate into vegetative leaves, whereas those formed later generate inflorescence branches and flowers. TERMINAL FLOWER 1 (TFL1) , a negative regulator of transcription, acts in the SAM to delay flowering and to maintain inflorescence meristem indeterminacy. …	in Arabidopsis, primordia formed early in development differentiate into vegetative leaves . those formed later generate inflorescence branches and flowers . TERMINAL FLOWER 1 acts in the SAM to delay flowering .	Development	150	23		1477-9129 (Electronic)	10.1242/dev.202089	https://www.ncbi.nlm.nih.gov/pubmed/37971083
Chae, T. | Harkess, A. | Moore, R. C.	Department of Biology, Miami University, Oxford, OH.	Sex-linked gene expression and the emergence of hermaphrodites in Carica papaya	Sex-linked gene expression and the emergence of hermaphrodites in Carica papaya	2021	*Carica/genetics	PREMISE: One evolutionary path from hermaphroditism to dioecy is via a gynodioecious intermediate. The evolution of dioecy may also coincide with the formation of sex chromosomes that possess sex-determining loci that are physically linked in a region of suppressed recombination. Dioecious papaya (Carica papaya) has an XY chromosome system, where the presence of a Y chromosome determines maleness…	papaya is gynodioecious due to the conversion of the male Y chromosome to a hermaphroditic . female (XX) expression in the sex-determining region was almost double that of males . loss-of-expression of the y-linked SHORT VEGETATIVE PHASE homolog facilitated the transition .	Am J Bot	108	6	1029-1041	1537-2197 (Electronic)	10.1002/ajb2.1689	https://www.ncbi.nlm.nih.gov/pubmed/34156700
Chai, L. | Li, H. | Zhao, X. | Cui, C. | Zheng, B. | Zhang, K. | Jiang, J. | Zhang, J. | Jiang, L.	Crop Research Institute, Sichuan Academy of Agricultural Sciences, Chengdu 610066, China.	Analysis of Altered Flowering Related Genes in a Multi-Silique Rapeseed (Brassica napus L.) Line zws-ms Based on Combination of Genome, Transcriptome and Proteome Data	Analysis of Altered Flowering Related Genes in a Multi-Silique Rapeseed (Brassica napus L.) Line zws-ms Based on Combination of Genome, Transcriptome and Proteome Data	2023	MADS-box protein	Based on previous researches, we further investigated the multi-silique trait in rapeseed (Brassica napus L.) line zws-ms. In this study, we used a relatively comprehensive list of flowering related genes in rapeseed and compared them between zws-ms and its near-isogenic line (NIL) zws-217. Genes were studied on genome, transcriptome and proteome levels and then we focused on genes with non-synon…	the multi-silique trait in rapeseed (Brassica napus L.) line zws-ms was investigated in this study . genes with non-synonymous single nucleotide polymorphism (SNP) or InDel were found to be probably responsible .	Plants (Basel)	12	13		2223-7747 (Print)	10.3390/plants12132429	https://www.ncbi.nlm.nih.gov/pubmed/37446989
Chang, Y. Y. | Kao, N. H. | Li, J. Y. | Hsu, W. H. | Liang, Y. L. | Wu, J. W. | Yang, C. H.	Graduate Institute of Biotechnology, National Chung Hsing University, Taichung, Taiwan 40227, Republic of China.	Characterization of the possible roles for B class MADS box genes in regulation of perianth formation in orchid	Characterization of the possible roles for B class MADS box genes in regulation of perianth formation in orchid	2010	Amino Acid Sequence	To investigate sepal/petal/lip formation in Oncidium Gower Ramsey, three paleoAPETALA3 genes, O. Gower Ramsey MADS box gene5 (OMADS5; clade 1) , OMADS3 (clade 2) , and OMADS9 (clade 3) , and one PISTILLATA gene, OMADS8, were characterized. The OMADS8 and OMADS3 mRNAs were expressed in all four floral organs as well as in vegetative leaves. The OMADS9 mRNA was only strongly detected in petals and …	three paleoAPETALA3genes,O. Gower Ramsey, were characterized . the mRNA forOMADS5was only strongly detected in sepals and petals . it was significantly down-regulated in lip-like petals of peloric mutant flowers .	Plant Physiol	152	2	837-53	1532-2548 (Electronic)	10.1104/pp.109.147116	https://www.ncbi.nlm.nih.gov/pubmed/20018605
Chatelet, P. | Laucou, V. | Fernandez, L. | Sreekantan, L. | Lacombe, T. | Martinez-Zapater, J. M. | Thomas, M. R. | Torregrosa, L.	INRA-UMR DAP, 2 place Viala, 34060 Montpellier Cedex 01, France.	Characterization of Vitis vinifera L. somatic variants exhibiting abnormal flower development patterns	Characterization of Vitis vinifera L. somatic variants exhibiting abnormal flower development patterns	2007	Flowers/*growth & development	Mutants have proven to be a key resource for functional genomic studies in model annual plant species. In perennial plant species where mutants are difficult to generate and to screen, spontaneous somatic variants represent a unique resource to understand the genetic control of complex developmental patterns. The morphological and histological characterization of six Vitis vinifera L. somatic var…	somatic variants display four different abnormal phenotypes of flower development . gene expression studies showed that the expression profiles ofVvMADS-box1, 2, and 3 were altered . the original cultivars displayed similar expression profiles .	J Exp Bot	58	15-16	4107-18	1460-2431 (Electronic)	10.1093/jxb/erm269	https://www.ncbi.nlm.nih.gov/pubmed/18042806
Chavez-Hernandez, E. C. | Quiroz, S. | Garcia-Ponce, B. | Alvarez-Buylla, E. R.	Laboratorio de Genetica Molecular, Desarrollo y Evolucion de Plantas, Departamento de Ecologia Funcional, Instituto de Ecologia, Universidad Nacional Autonoma de Mexico, Mexico City, Mexico.	The flowering transition pathways converge into a complex gene regulatory network that underlies the phase changes of the shoot apical meristem in Arabidopsis thaliana	The flowering transition pathways converge into a complex gene regulatory network that underlies the phase changes of the shoot apical meristem in Arabidopsis thaliana	2022	Boolean model	Post-embryonic plant development is characterized by a period of vegetative growth during which a combination of intrinsic and extrinsic signals triggers the transition to the reproductive phase. To understand how different flowering inducing and repressing signals are associated with phase transitions of the Shoot Apical Meristem (SAM) , we incorporated available data into a dynamic gene regulat…	post-embryonic plant development is characterized by a period of vegetative growth . a combination of intrinsic and extrinsic signals triggers the transition to the reproductive phase . the model recovered the phenotypes of previously described single mutants .	Front Plant Sci	13		852047	1664-462X (Print)	10.3389/fpls.2022.852047	https://www.ncbi.nlm.nih.gov/pubmed/36017258
Chen, C. | Begcy, K. | Liu, K. | Folsom, J. J. | Wang, Z. | Zhang, C. | Walia, H.	Department of Agronomy and Horticulture (C.C., K.B., J.J.F., Z.W., H.W.) and School of Biological Sciences (K.L., C.Z.) , University of Nebraska, Lincoln, Nebraska 68583; andKey Laboratory of Crop Genetics and Physiology of Jiangsu Province and Key Laboratory of Plant Functional Genomics of the Ministry of Education, College of Agriculture, Yangzhou University, Yangzhou 225009, China (C.C.) .	Heat stress yields a unique MADS box transcription factor in determining seed size and thermal sensitivity	Heat stress yields a unique MADS box transcription factor in determining seed size and thermal sensitivity	2016	Cell Cycle/physiology	Early seed development events are highly sensitive to increased temperature. This high sensitivity to a short-duration temperature spike reduces seed viability and seed size at maturity. The molecular basis of heat stress sensitivity during early seed development is not known. We selected rice (Oryza sativa) , a highly heat-sensitive species, to explore this phenomenon. Here, we elucidate the mol…	the molecular basis of heat stress sensitivity during early seed development is not known . rice (oryza sativa) is a highly heat-sensitive species . a transcriptomic comparison of seeds exposed to moderate and severe heat stress with control seeds identified a set of putative imprinted genes .	Plant Physiol	171	1	606-22	1532-2548 (Electronic)	10.1104/pp.15.01992	https://www.ncbi.nlm.nih.gov/pubmed/26936896
Chen, F. | Zhang, X. | Liu, X. | Zhang, L.	Center for Genomics and Biotechnology, Key Laboratory of Ministry of Education for Genetics, Breeding and Multiple Utilization of Crops, Fujian Provincial Key Laboratory of Haixia Applied Plant Systems Biology, Fujian Agriculture and Forestry UniversityFuzhou, China.	Evolutionary Analysis of MIKC (c) -Type MADS-Box Genes in Gymnosperms and Angiosperms	Evolutionary Analysis of MIKC (c) -Type MADS-Box Genes in Gymnosperms and Angiosperms	2017	ABCE model	MIKC (c) -type MADS-box genes encode transcription factors that control floral organ morphogenesis and flowering time in flowering plants. Here, in order to determine when the subfamilies of MIKC (c) originated and their early evolutionary trajectory, we sampled and analyzed the genomes and large-scale transcriptomes representing all the orders of gymnosperms and basal angiosperms. Through phylog…	phylogenetic inference reveals the origin of a novel subfamily of MIKCsup>c genes . the genes encode transcription factors that control floral organ morphogenesis and flowering time in flowering plants . they were subdivided into 14 monophyletic clades, including gymnosperms .	Front Plant Sci	8		895	1664-462X (Print)	10.3389/fpls.2017.00895	https://www.ncbi.nlm.nih.gov/pubmed/28611810
Chen, M. | Li, L. | Wang, S. | Wang, P. | Li, Y.	Department of Ornamental Plant Research Center, Institute of Botany, Jiangsu Province and Chinese Academy of Sciences, Nanjing, China.	Transcriptome sequencing and screening of genes related to the MADS-box gene family in Clematis courtoisii	Transcriptome sequencing and screening of genes related to the MADS-box gene family in Clematis courtoisii	2024	*Clematis/genetics	The MADS-box gene family controls plant flowering and floral organ development; therefore, it is particularly important in ornamental plants. To investigate the genes associated with the MADS-box family in Clematis courtoisii, we performed full-length transcriptome sequencing on C. courtoisii using the PacBio Sequel third-generation sequencing platform, as no reference genome data was available. …	the MADS-box gene family controls plant flowering and floral organ development . it is particularly important in ornamental plants . a total of 37,923 Unigenes were assigned with functional annotations .	PLoS One	19	2	e0294426	1932-6203 (Electronic)	10.1371/journal.pone.0294426	https://www.ncbi.nlm.nih.gov/pubmed/38315679
Chen, M. K. | Hsu, W. H. | Lee, P. F. | Thiruvengadam, M. | Chen, H. I. | Yang, C. H.	Graduate Institute of Biotechnology, National Chung Hsing University, Taichung, Taiwan 40227, Taiwan.	The MADS box gene, FOREVER YOUNG FLOWER, acts as a repressor controlling floral organ senescence and abscission in Arabidopsis	The MADS box gene, FOREVER YOUNG FLOWER, acts as a repressor controlling floral organ senescence and abscission in Arabidopsis	2011	Arabidopsis/anatomy & histology/drug effects/genetics/*physiology	The ectopic expression of a MADS box gene FOREVER YOUNG FLOWER (FYF) caused a significant delay of senescence and a deficiency of abscission in flowers of transgenic Arabidopsis. The defect in floral abscission was found to be due to a deficiency in the timing of cell separation of the abscission zone cells. Down-regulation of INFLORESCENCE DEFICIENT IN ABSCISSION (IDA) may contribute to the dela…	ectopic expression of a MADS box gene caused a delay of senescence . deficiency in timing of cell separation of abscission zone cells . down-regulation of INFLORESCENCE DEFICIENT IN ABSCISSION .	Plant J	68	1	168-85	1365-313X (Electronic)	10.1111/j.1365-313X.2011.04677.x	https://www.ncbi.nlm.nih.gov/pubmed/21689171
Chen, M. K. | Lee, P. F. | Yang, C. H.	Graduate Institute of Biotechnology, National Chung Hsing University, Taichung, Taiwan.	Delay of flower senescence and abscission in Arabidopsis transformed with an FOREVER YOUNG FLOWER homolog from Oncidium orchid	Delay of flower senescence and abscission in Arabidopsis transformed with an FOREVER YOUNG FLOWER homolog from Oncidium orchid	2011	Arabidopsis/genetics/*physiology	The ectopic expression of FOREVER YOUNG FLOWER (FYF) , a MADS box gene in Arabidopsis, caused significant delay of senescence and a deficiency of abscission in flowers of transgenic Arabidopsis. It was proposed that the function of the FYF gene was related to the regulation of senescence and abscission. This hypothesis was further supported by one line of evidence reported in this study. The evid…	ectopic expression of FOREVER YOUNG FLOWER ( FYF ) caused significant delay of senescence and a deficiency of abscission in flowers of transgenic Arabidopsis . evidence suggests function of FYF gene was related to the regulation of flowers .	Plant Signal Behav	6	11	1841-3	1559-2324 (Electronic)	10.4161/psb.6.11.17612	https://www.ncbi.nlm.nih.gov/pubmed/22041990
Chen, N. | Veerappan, V. | Abdelmageed, H. | Kang, M. | Allen, R. D.	Institute for Agricultural Biosciences, Oklahoma State University, Ardmore, Oklahoma 73401.	HSI2/VAL1 Silences AGL15 to Regulate the Developmental Transition from Seed Maturation to Vegetative Growth in Arabidopsis	HSI2/VAL1 Silences AGL15 to Regulate the Developmental Transition from Seed Maturation to Vegetative Growth in Arabidopsis	2018	Arabidopsis/genetics/*metabolism	Gene expression during seed development in Arabidopsis thaliana is controlled by transcription factors including LEAFY COTYLEDON1 (LEC1) and LEC2, ABA INSENSITIVE3 (ABI3) , FUSCA3 (FUS3) , known as LAFL proteins, and AGAMOUS-LIKE15 (AGL15) . The transition from seed maturation to germination and seedling growth requires the transcriptional silencing of these seed maturation-specific factors leadi…	gene expression during seed development inArabidopsis thalianais controlled by transcription factors . transcription factors include LEAFY COTYLEDON1 and LEC2, ABA INSENSITIVE3 and FUSCA3 . HSI2/VAL1 is required for the transcriptional silencing ofLAFLgenes .	Plant Cell	30	3	600-619	1532-298X (Electronic)	10.1105/tpc.17.00655	https://www.ncbi.nlm.nih.gov/pubmed/29475938
Chen, Q. | Li, J. | Yang, F.	State Key Laboratory of Crop Biology, College of Horticulture Science and Engineering, Shandong Agricultural University, Tai'an 271018, China.	Genome-Wide Analysis of the Mads-Box Transcription Factor Family in Solanum melongena	Genome-Wide Analysis of the Mads-Box Transcription Factor Family in Solanum melongena	2023	*Transcription Factors/genetics/metabolism	The MADS-box transcription factors are known to be involved in several aspects of plant growth and development, especially in floral organ specification. However, little is known in eggplant. Here, 120 eggplant MADS-box genes were identified and categorized into type II (MIKCC and MIKC*) and type I (Malpha, Mbeta, and Mgamma) subfamilies based on phylogenetic relationships. The exon number in typ…	120 eggplant MADS-box genes were identified and categorized into type II and type I subfamilies . gene duplication analysis revealed segmental duplications were the sole contributor to the expansion of type II genes . in flowers of SmMYB113-overexpression transgenic plants, the expression levels of 3 SmMADS- box genes were co-regulated in different tissues .	Int J Mol Sci	24	1		1422-0067 (Electronic)	10.3390/ijms24010826	https://www.ncbi.nlm.nih.gov/pubmed/36614267
Chen, R. | Ma, J. | Luo, D. | Hou, X. | Ma, F. | Zhang, Y. | Meng, Y. | Zhang, H. | Guo, W.	College of Horticulture, Northwest A&F University, Yangling, Shaanxi, 712100, China; State Key Laboratory of Crop Stress Biology in Arid Areas, Northwest A&F University, China. Electronic address: rugangchen@nwsuaf.edu.cn.	CaMADS, a MADS-box transcription factor from pepper, plays an important role in the response to cold, salt, and osmotic stress	CaMADS, a MADS-box transcription factor from pepper, plays an important role in the response to cold, salt, and osmotic stress	2019	Abscisic Acid/pharmacology	MADS-box family transcription factors play essential roles in the growth and development of plants, and some MADS-box genes have also been found to participate in the stress-response. At present, little information regarding stress-related MADS-box genes is available in pepper. We isolated a MADS-box transcription factor gene from Capsicum annuum, which we named CaMADS. CaMADS expression is induc…	the expression of CaMADS was induced by low and high temperature, salt, and osmotic stress, and also by ABA , SA, MeJA , and CaCl 2 . 'caMADS' is a putative 241 amino acid protein containing the characteristic MADS domain as well as the I, K, and C domains .	Plant Sci	280		164-174	1873-2259 (Electronic)	10.1016/j.plantsci.2018.11.020	https://www.ncbi.nlm.nih.gov/pubmed/30823994
Chen, W. | Tamada, Y. | Yamane, H. | Matsushita, M. | Osako, Y. | Gao-Takai, M. | Luo, Z. | Tao, R.	Graduate School of Agriculture, Kyoto University, Kyoto, Japan.	H3K4me3 plays a key role in establishing permissive chromatin states during bud dormancy and bud break in apple (Malus domesticus)	H3K4me3 plays a key role in establishing permissive chromatin states during bud dormancy and bud break in apple (Malus domesticus)	2022	Abscisic Acid/metabolism	Bud dormancy helps woody perennials survive winter and activate robust plant development in the spring. For apple (Malus domesticus) (Malus x domestica) , short-term chilling induces bud dormancy in autumn, then prolonged chilling leads to dormancy release and a shift to a quiescent state in winter, with subsequent warm periods promoting bud break in spring. Epigenetic regulation contributes to s…	how histone modifications integrate seasonal cues and internal signals during bud dormancy remains unknown . high expression of DORMANCY-ASSOCIATED MADS-box genes in autumn was associated with high levels of H3K4me3 .	Plant J	111	4	1015-1031	1365-313X (Electronic)	10.1111/tpj.15868	https://www.ncbi.nlm.nih.gov/pubmed/35699670
Chen, Y. Y. | Lee, P. F. | Hsiao, Y. Y. | Wu, W. L. | Pan, Z. J. | Lee, Y. I. | Liu, K. W. | Chen, L. J. | Liu, Z. J. | Tsai, W. C.	Institute of Tropical Plant Sciences, National Cheng Kung University, Tainan 701, Taiwan.	C- and D-class MADS-box genes from Phalaenopsis equestris (Orchidaceae) display functions in gynostemium and ovule development	C- and D-class MADS-box genes from Phalaenopsis equestris (Orchidaceae) display functions in gynostemium and ovule development	2012	Amino Acid Sequence	Gynostemium and ovule development in orchids are unique developmental processes in the plant kingdom. Characterization of C- and D-class MADS-box genes could help reveal the molecular mechanisms underlying gynostemium and ovule development in orchids. In this study, we isolated and characterized a C- and a D-class gene, PeMADS1 and PeMADS7, respectively, from Phalaenopsis equestris. These two gen…	characterization of C- and D-class MADS-box genes could reveal molecular mechanisms . gynostemium and ovule development in orchids are unique in the plant kingdom . onlyPeMADS1was ectopically expressed in the petals of the mutant .	Plant Cell Physiol	53	6	1053-67	1471-9053 (Electronic)	10.1093/pcp/pcs048	https://www.ncbi.nlm.nih.gov/pubmed/22499266
Cheng, G. | Zhang, F. | Shu, X. | Wang, N. | Wang, T. | Zhuang, W. | Wang, Z.	Institute of Botany, Jiangsu Province and Chinese Academy of Sciences (Nanjing Botanical Garden Mem. Sun Yat-Sen) , Nanjing 210014, China.	Identification of Differentially Expressed Genes Related to Floral Bud Differentiation and Flowering Time in Three Populations of Lycoris radiata	Identification of Differentially Expressed Genes Related to Floral Bud Differentiation and Flowering Time in Three Populations of Lycoris radiata	2022	*Lycoris	The transition from vegetative to reproductive growth is important for controlling the flowering of Lycoris radiata. However, the genetic control of this complex developmental process remains unclear. In this study, 18 shoot apical meristem (SAM) samples were collected from early-, mid- and late-flowering populations during floral bud differentiation. The histological analysis of paraffin section…	the genetic control of this complex developmental process remains unclear . the differentiation time of the early group was earlier than that of the middle and late groups . results can preliminarily explain the molecular mechanism of floral bud differentiation .	Int J Mol Sci	23	22		1422-0067 (Electronic)	10.3390/ijms232214036	https://www.ncbi.nlm.nih.gov/pubmed/36430515
Cheng, H. | Xie, X. | Ren, M. | Yang, S. | Zhao, X. | Mahna, N. | Liu, Y. | Xu, Y. | Xiang, Y. | Chai, H. | Zheng, L. | Ge, H. | Jia, R.	Key Laboratory of Biology and Genetic Improvement of Flower Crops (North China) , Ministry of Agriculture and Rural Affairs, Institute of Vegetables and Flowers, Chinese Academy of Agricultural Sciences, Beijing, China.	Characterization of Three SEPALLATA-Like MADS-Box Genes Associated With Floral Development in Paphiopedilum henryanum (Orchidaceae)	Characterization of Three SEPALLATA-Like MADS-Box Genes Associated With Floral Development in Paphiopedilum henryanum (Orchidaceae)	2022	Paphiopedilum	Paphiopedilum (Orchidaceae) is one of the world's most popular orchids that is found in tropical and subtropical forests and has an enormous ornamental value. SEPALLATA-like (SEP-like) MADS-box genes are responsible for floral organ specification. In this study, three SEP-like MADS-box genes, PhSEP1, PhSEP2, and PhSEP3, were identified in Paphiopedilum henryanum. These genes were 732-916 bp, with…	italic>Paphiopedilum henryanum is one of the worldÕs most popular orchids . it is found in tropical and subtropical forests and has an enormous ornamental value . phylogenetic analysis revealed that . genes were evolutionarily closer to the core eudicot .	Front Plant Sci	13		916081	1664-462X (Print)	10.3389/fpls.2022.916081	https://www.ncbi.nlm.nih.gov/pubmed/35693163
Cheng, S. | Jia, M. | Su, L. | Liu, X. | Chu, Q. | He, Z. | Zhou, X. | Lu, W. | Jiang, C.	College of Horticulture, Sichuan Agricultural University, Chengdu 611130, China.	Genome-Wide Identification of the MADS-Box Gene Family during Male and Female Flower Development in Chayote (Sechium edule)	Genome-Wide Identification of the MADS-Box Gene Family during Male and Female Flower Development in Chayote (Sechium edule)	2023	*MADS Domain Proteins/genetics/metabolism	The MADS-box gene plays an important role in plant growth and development. As an important vegetable of Cucurbitaceae, chayote has great edible and medicinal value. So far, there is little molecular research on chayote, and there are no reports on the MADS-box transcription factor of chayote. In this study, the MADS-box gene family of chayote was analyzed for the first time, and a total of 70 MAD…	the MADS-box gene family of chayote was analyzed for the first time . a total of 70 genes were identified, including 14 type I and 56 type II MICK MADS genes . results of collinearity showed that segmental duplication was the main driving force of MADS gene expansion .	Int J Mol Sci	24	7		1422-0067 (Electronic)	10.3390/ijms24076114	https://www.ncbi.nlm.nih.gov/pubmed/37047083
Cheng, X. | Wang, H. | Wei, H. | Gu, L. | Hao, P. | Sun, H. | Wu, A. | Cheng, S. | Yu, S.	State Key Laboratory of Cotton Biology, Institute of Cotton Research of CAAS, Anyang 455000, China; College of Agronomy and Biotechnology, China Agricultural University, Beijing 100193, China. Electronic address: chengxiaoqian2@163.com.	The MADS transcription factor GhAP1.7 coordinates the flowering regulatory pathway in upland cotton (Gossypium hirsutum L.)	The MADS transcription factor GhAP1.7 coordinates the flowering regulatory pathway in upland cotton (Gossypium hirsutum L.)	2021	Cell Nucleus/metabolism	MADS-box gene family plays an important role in the molecular regulatory network of flower development. APETALA1 (AP1) , a MADS-box gene, plays an important role in the development of flower organs. Although many studies about MADS-box family genes have been reported, the function of AP1 is still not clear in cotton. In this study, GhAP1.7 (Gh_D03G0922) , a candidate gene for cotton flower time a…	GhAP1.7 ( Gh_D03G0922 ) was found to be able to regulate the flowering time of cotton . yeast one-hybrid assays suggested that floral meristem identity control gene LEAFY (LFY) can bind the promoter . GhLFY can regulate itÕs expression negatively .	Gene	769		145235	1879-0038 (Electronic)	10.1016/j.gene.2020.145235	https://www.ncbi.nlm.nih.gov/pubmed/33148424
Cheng, Z. | Ge, W. | Li, L. | Hou, D. | Ma, Y. | Liu, J. | Bai, Q. | Li, X. | Mu, S. | Gao, J.	Key Laboratory of Bamboo and Rattan Science and Technology of the State Forestry Administration, International Centre for Bamboo and RattanBeijing, China.	Analysis of MADS-Box Gene Family Reveals Conservation in Floral Organ ABCDE Model of Moso Bamboo (Phyllostachys edulis)	Analysis of MADS-Box Gene Family Reveals Conservation in Floral Organ ABCDE Model of Moso Bamboo (Phyllostachys edulis)	2017	ABCDE model	Mini chromosome maintenance 1, agamous, deficiens, and serum response factor (MADS) -box genes are transcription factors which play fundamental roles in flower development and regulation of floral organ identity. However, till date, identification and functions of MADS-box genes remain largely unclear in Phyllostachys edulis. In view of this, we performed a whole-genome survey and identified 34 M…	phyllostachys edulis has 34 MADS-box genes . expression patterns for most genes were similar to those of arabidopsis and rice . phylogenetic classification, comparison of gene divergence and duplication are provided .	Front Plant Sci	8		656	1664-462X (Print)	10.3389/fpls.2017.00656	https://www.ncbi.nlm.nih.gov/pubmed/28515730
Chi, Y. | Wang, T. | Xu, G. | Yang, H. | Zeng, X. | Shen, Y. | Yu, D. | Huang, F.	National Center for Soybean Improvement, Key Laboratory of Biology and Genetic Improvement of Soybean Ministry of Agriculture P.R. China, State Key Laboratory of Crop Genetics and Germplasm Enhancement, Nanjing Agricultural UniversityNanjing, China; College of Agro-grassland Science, Nanjing Agricultural UniversityNanjing, China.	GmAGL1, a MADS-Box Gene from Soybean, Is Involved in Floral Organ Identity and Fruit Dehiscence	GmAGL1, a MADS-Box Gene from Soybean, Is Involved in Floral Organ Identity and Fruit Dehiscence	2017	Agamous-like1	MADS-domain proteins are important transcription factors involved in many aspects of plant reproductive development. In this study, a MADS-box gene, soybean AGAMOUS-LIKE1 (GmAGL1) , was isolated from soybean flower. The transcript of GmAGL1 was expressed in flowers and pods of different stages in soybean and was highly expressed in carpels. GmAGL1 is a nucleus-localized transcription factor and c…	a MADS-box gene was isolated from soybean flower . italic>GmAGL1/italic] is a nucleus-localized transcription factor . it can interact directly with SEP-like proteins in soybean flowers .	Front Plant Sci	8		175	1664-462X (Print)	10.3389/fpls.2017.00175	https://www.ncbi.nlm.nih.gov/pubmed/28232846
Choi, J. | Gehring, M.	Whitehead Institute for Biomedical Research, Cambridge MA 02142.	CRWN nuclear lamina components maintain the H3K27me3 landscape and promote successful reproduction in Arabidopsis	CRWN nuclear lamina components maintain the H3K27me3 landscape and promote successful reproduction in Arabidopsis	2023		The nuclear lamina, a sub-nuclear protein matrix, maintains nuclear structure and genome function. Here, we investigate the role of Arabidopsis lamin analogs CROWDED NUCLEIs during gametophyte and seed development. We observed defects in crwn mutant seeds, including seed abortion and reduced germination rate. Quadruple crwn null genotypes were rarely transmitted through gametophytes. We focused o…	the nuclear lamina, a sub-nuclear protein matrix, maintains nuclear structure and genome function . we observed defects in crwn mutant seeds, including seed abortion and reduced germination rate .	bioRxiv					10.1101/2023.10.03.560721	https://www.ncbi.nlm.nih.gov/pubmed/37873406
Chopy, M. | Cavallini-Speisser, Q. | Chambrier, P. | Morel, P. | Just, J. | Hugouvieux, V. | Rodrigues Bento, S. | Zubieta, C. | Vandenbussche, M. | Monniaux, M.	Laboratoire de Reproduction et Developpement des Plantes, Universite de Lyon, ENS de Lyon, UCB Lyon 1, CNRS, INRAE, Lyon 69007, France.	Cell layer-specific expression of the homeotic MADS-box transcription factor PhDEF contributes to modular petal morphogenesis in petunia	Cell layer-specific expression of the homeotic MADS-box transcription factor PhDEF contributes to modular petal morphogenesis in petunia	2024	*Transcription Factors/genetics/metabolism	Floral homeotic MADS-box transcription factors ensure the correct morphogenesis of floral organs, which are organized in different cell layers deriving from distinct meristematic layers. How cells from these distinct layers acquire their respective identities and coordinate their growth to ensure normal floral organ morphogenesis is unresolved. Here, we studied petunia (Petunia x hybrida) petals …	petunia petals form a limb and tube through congenital fusion . mutants highlight the layer-specific roles of PhDEF during petal development .	Plant Cell	36	2	324-345	1532-298X (Electronic)	10.1093/plcell/koad258	https://www.ncbi.nlm.nih.gov/pubmed/37804091
Chu, Y. | Xu, N. | Wu, Q. | Yu, B. | Li, X. | Chen, R. | Huang, J.	Key Laboratory of Biorheological Science and Technology, Ministry of Education, Bioengineering College, Chongqing University, Chongqing, People's Republic of China.	Rice transcription factor OsMADS57 regulates plant height by modulating gibberellin catabolism	Rice transcription factor OsMADS57 regulates plant height by modulating gibberellin catabolism	2019	GA catabolism	BACKGROUND: The MADS-box transcription factors mainly function in floral organ organogenesis and identity specification. Few research on their roles in vegetative growth has been reported. RESULTS: Here we investigated the functions of OsMADS57 in plant vegetative growth in rice (Oryza sativa) . Knockdown of OsMADS57 reduced the plant height, internode elongation and panicle exsertion in rice pla…	the MADS-box transcription factors mainly function in floral organ organogenesis . few research on their roles in vegetative growth has been reported . knockdown of OsMADS57 reduced the plant height, internode elongation and panicle exsertion .	Rice (N Y)	12	1	38	1939-8425 (Print)	10.1186/s12284-019-0298-6	https://www.ncbi.nlm.nih.gov/pubmed/31139953
Ciannamea, S. | Kaufmann, K. | Frau, M. | Tonaco, I. A. | Petersen, K. | Nielsen, K. K. | Angenent, G. C. | Immink, R. G.	Plant Research International, Business unit Bioscience, Bornsesteeg 65, 6708 PD, Wageningen, The Netherlands.	Protein interactions of MADS box transcription factors involved in flowering in Lolium perenne	Protein interactions of MADS box transcription factors involved in flowering in Lolium perenne	2006	Amino Acid Sequence	Regulation of flowering time is best understood in the dicot model species Arabidopsis thaliana. Molecular analyses revealed that genes belonging to the MADS box transcription factor family play pivotal regulatory roles in both the vernalization- and photoperiod-regulated flowering pathways. Here the analysis of three APETALA1 (AP1) -like MADS box proteins (LpMADS1-3) and a SHORT VEGETATIVE PHASE…	gene family plays pivotal role in vernalization- and photoperiod-regulated flowering . features of AP1-like MADS box proteins were studied by yeast two-hybrid assays .	J Exp Bot	57	13	3419-31	0022-0957 (Print)	10.1093/jxb/erl144	https://www.ncbi.nlm.nih.gov/pubmed/17005923
Coen, O. | Fiume, E. | Xu, W. | De Vos, D. | Lu, J. | Pechoux, C. | Lepiniec, L. | Magnani, E.	Institut Jean-Pierre Bourgin, INRA, AgroParisTech, CNRS, University of Paris-Saclay, Route de St-Cyr (RD10) , Versailles Cedex 78026, France.	Developmental patterning of the sub-epidermal integument cell layer in Arabidopsis seeds	Developmental patterning of the sub-epidermal integument cell layer in Arabidopsis seeds	2017	Arabidopsis/*cytology/*embryology	Angiosperm seed development is a paradigm of tissue cross-talk. Proper seed formation requires spatial and temporal coordination of the fertilization products - embryo and endosperm - and the surrounding seed coat maternal tissue. In early Arabidopsis seed development, all seed integuments were thought to respond homogenously to endosperm growth. Here, we show that the sub-epidermal integument ce…	angiosperm seed development is a paradigm of tissue cross-talk . Proper seed formation requires spatial and temporal coordination of the fertilization products Ð embryo and endosperm Ð and the surrounding seed coat maternal tissue . here, we show that the sub-epidermal integument cell layer has a unique developmental program.	Development	144	8	1490-1497	1477-9129 (Electronic)	10.1242/dev.146274	https://www.ncbi.nlm.nih.gov/pubmed/28348169
Coenen, H. | Viaene, T. | Vandenbussche, M. | Geuten, K.	Department of Biology, KU Leuven, Kasteelpark Arenberg 31, B-3001, Leuven, Belgium.	TM8 represses developmental timing in Nicotiana benthamiana and has functionally diversified in angiosperms	TM8 represses developmental timing in Nicotiana benthamiana and has functionally diversified in angiosperms	2018	Biological Evolution	BACKGROUND: MADS-box genes are key regulators of plant reproductive development and members of most lineages of this gene family have been extensively studied. However, the function and diversification of the ancient TM8 lineage remains elusive to date. The available data suggest a possible function in flower development in tomato and fast evolution through numerous gene loss events in flowering …	the function and diversification of the ancient TM8 lineage remains elusive . the data suggest a possible function in flower development in tomato . no gene duplicates have been retained after major whole genome duplication events .	BMC Plant Biol	18	1	129	1471-2229 (Electronic)	10.1186/s12870-018-1349-7	https://www.ncbi.nlm.nih.gov/pubmed/29929474
Colombo, L. | Franken, J. | Koetje, E. | van Went, J. | Dons, H. J. | Angenent, G. C. | van Tunen, A. J.	Department of Developmental Biology, DLO-Centre for Plant Breeding and Reproduction Research, Wageningen, The Netherlands.	The petunia MADS box gene FBP11 determines ovule identity	The petunia MADS box gene FBP11 determines ovule identity	1995	Base Sequence	In contrast to the wealth of information relating to genes regulating floral meristem and floral organ identity, only limited data are available concerning genes that are involved in determining and regulating the identity and development of an ovule. We have recently isolated the floral binding protein 11 (FBP11) MADS box gene from petunia and found that it is expressed exclusively in ovule prim…	the floral binding protein 11 (FBP11) MADS box gene is expressed exclusively in ovule primordia . this suggests a role for this gene in the formation of an ovary . morphological studies showed that these ovulationlike structures are true ovales .	Plant Cell	7	11	1859-68	1040-4651 (Print)	10.1105/tpc.7.11.1859	https://www.ncbi.nlm.nih.gov/pubmed/8535139
Colombo, M. | Masiero, S. | Vanzulli, S. | Lardelli, P. | Kater, M. M. | Colombo, L.	Dipartimento di Biologia, Universita degli Studi di Milano, via Celoria 26, 20133 Milano, Italy.	AGL23, a type I MADS-box gene that controls female gametophyte and embryo development in Arabidopsis	AGL23, a type I MADS-box gene that controls female gametophyte and embryo development in Arabidopsis	2008	Arabidopsis/embryology/*genetics/metabolism	MADS-box transcription factors are key regulators of plant developmental processes. While the function of MIKC (type II) MADS-box genes has been intensively studied, only limited data are available for the other more recently identified classes of MADS-box genes, despite these latter comprising more than 60% of the Arabidopsis MADS-box gene family. Here we describe the function of AGL23, an Arabi…	AGL23 is an Arabidopsis type I MADS-box gene belonging to the M subfamily . it plays an important role during development of the female gametophyte and embryo . the agl23-1 mutant forms a functional megaspore .	Plant J	54	6	1037-48	1365-313X (Electronic)	10.1111/j.1365-313X.2008.03485.x	https://www.ncbi.nlm.nih.gov/pubmed/18346189
Conde, E. Silva N. | Leguilloux, M. | Bellec, A. | Rodde, N. | Aubert, J. | Manicacci, D. | Damerval, C. | Berges, H. | Deveaux, Y.	Universite Paris-Saclay, INRAE, CNRS, AgroParisTech, Genetique Quantitative et Evolution-Le Moulon, IDEEV, 12 route 128, 91190 Gif-sur-Yvette, France.	A MITE insertion abolishes the AP3-3 self-maintenance regulatory loop in apetalous flowers of Nigella damascena	A MITE insertion abolishes the AP3-3 self-maintenance regulatory loop in apetalous flowers of Nigella damascena	2023	*Nigella damascena/metabolism	MADS-box transcription factors are important regulators of floral organ identity through their binding to specific motifs, termed CArG, in the promoter of their target genes. Petal initiation and development depend on class A and B genes, but MADS-box genes of the APETALA3 (AP3) clade are key regulators of this process. In the early diverging eudicot Nigella damascena, an apetalous [T] morph is c…	MADS-box transcription factors are important regulators of floral organ identity . they are binding to specific motifs, termed CArG, in the promoter of their target genes . in the early diverging eudicot Nigella damascena, apetalous [T] morph is characterized by lack of expression of the NdAP3-3 gene .	J Exp Bot	74	5	1448-1459	1460-2431 (Electronic)	10.1093/jxb/erac489	https://www.ncbi.nlm.nih.gov/pubmed/36512646
Costa, Z. P. | Varani, A. M. | Cauz-Santos, L. A. | Sader, M. A. | Giopatto, H. A. | Zirpoli, B. | Callot, C. | Cauet, S. | Marande, W. | Souza Cardoso, J. L. | Pinheiro, D. G. | Kitajima, J. P. | Dornelas, M. C. | Harand, A. P. | Berges, H. | Monteiro-Vitorello, C. B. | Carneiro Vieira, M. L.	Dep. de Genetica, Escola Superior de Agricultura "Luiz de Queiroz", Univ. de Sao Paulo, Piracicaba, 13418-900, Brazil.	A genome sequence resource for the genus Passiflora, the genome of the wild diploid species Passiflora organensis	A genome sequence resource for the genus Passiflora, the genome of the wild diploid species Passiflora organensis	2021	Diploidy	The genus Passiflora comprises a large group of plants popularly known as passionfruit, much appreciated for their exotic flowers and edible fruits. The species ( approximately 500) are morphologically variable (e.g., growth habit, size, and color of flowers) and are adapted to distinct tropical ecosystems. In this study, we generated the genome of the wild diploid species Passiflora organensis G…	genus Passiflora is a large group of plants popularly known as passionfruit . it has a small genome of 259 Mbp and a heterozygosity rate of 81% . most of the genome sequences could be integrated into its chromosomes .	Plant Genome	14	3	e20117	1940-3372 (Electronic)	10.1002/tpg2.20117	https://www.ncbi.nlm.nih.gov/pubmed/34296827
Cronk, Q. | Soolanayakanahally, R. | Brautigam, K.	Department of Botany, University of British Columbia, Vancouver, BC, V6T 1Z4, Canada. quentin.cronk@ubc.ca.	Gene expression trajectories during male and female reproductive development in balsam poplar (Populus balsamifera L.)	Gene expression trajectories during male and female reproductive development in balsam poplar (Populus balsamifera L.)	2020	Chromatin/metabolism	Plant reproductive development from the first appearance of reproductively committed axes through to floral maturation requires massive and rapid remarshalling of gene expression. In dioecious species such as poplar this is further complicated by divergent male and female developmental programs. We used seven time points in male and female balsam poplar (Populus balsamifera L.) buds and catkins r…	time (developmental stage) is dominant in patterning gene expression . effect of sex nested within this . male-biased expression of genes PISTILLATA and APETALA3 .	Sci Rep	10	1	8413	2045-2322 (Electronic)	10.1038/s41598-020-64938-w	https://www.ncbi.nlm.nih.gov/pubmed/32439903
Cseke, L. J. | Ravinder, N. | Pandey, A. K. | Podila, G. K.	The University of Alabama in Huntsville, Department of Biological Sciences, Huntsville, AL 35899, USA.	Identification of PTM5 protein interaction partners, a MADS-box gene involved in aspen tree vegetative development	Identification of PTM5 protein interaction partners, a MADS-box gene involved in aspen tree vegetative development	2007	Amino Acid Sequence	In a past article, our lab described the identification and characterization of a novel vegetative MADS-box gene from quaking aspen trees, Populus tremuloides MADS-box 5 (PTM5) . PTM5 was shown to be a member of the SOC1/TM3 class of MADS-box genes with a seasonal expression pattern specific to developing vascular tissues including the vascular cambium, the precursor to all woody branches, stems,…	populus tremuloides MADS-box 5 (PTM5) is a member of the SOC1/TM3 class . it has a seasonal expression pattern specific to developing vascular tissues . a yeast two-hybrid analysis revealed that PTM5 interacts with two non-MADS proteins, an actin depolymerizing factor (PtADF) and a novel leucine-rich repeat protein (ptLRR)	Gene	391	01-Feb	209-22	0378-1119 (Print)	10.1016/j.gene.2006.12.033	https://www.ncbi.nlm.nih.gov/pubmed/17331677
Cui, W. | Chen, Z. | Shangguan, X. | Li, T. | Wang, L. | Xue, X. | Cao, J.	National Key Laboratory of Plant Molecular genetics, Institute of Plant Physiology and Ecology/CAS Center for Excellence in Molecular Plant Sciences, Chinese Academy of Sciences, Shanghai 200032, China.	TRY intron2 determined its expression in inflorescence activated by SPL9 and MADS-box genes in Arabidopsis	TRY intron2 determined its expression in inflorescence activated by SPL9 and MADS-box genes in Arabidopsis	2022	*Arabidopsis/metabolism	Plant trichomes are specialized epidermal cells that protect plants from insects and pathogens. In Arabidopsis, epidermal hairs decrease as internodes increase in height, with only few epidermal hairs produced on the sepals abaxial surface of the early flowers. TRIPTYCHON (TRY) is known to be a negative regulator of epidermal hair development in Arabidopsis, suppressing the formation of ectopic e…	TRY expresses high in the inflorescence contributing to no trichomes in this part . TRY promoter could only drive the genomic sequence instead of CDS . the intron2 of cotton TRY genes also contains the cis -elements .	Plant Sci	321		111311	1873-2259 (Electronic)	10.1016/j.plantsci.2022.111311	https://www.ncbi.nlm.nih.gov/pubmed/35696911
Dai, G. Y. | Chen, D. K. | Sun, Y. P. | Liang, W. Y. | Liu, Y. | Huang, L. Q. | Li, Y. K. | He, J. F. | Yao, N.	State Key Laboratory of Biocontrol, Guangdong Provincial Key Laboratory of Plant Resources, School of Life Sciences, Sun Yat-Sen University, Guangzhou, 510275, People's Republic of China.	The Arabidopsis KH-domain protein FLOWERING LOCUS Y delays flowering by upregulating FLOWERING LOCUS C family members	The Arabidopsis KH-domain protein FLOWERING LOCUS Y delays flowering by upregulating FLOWERING LOCUS C family members	2020	Arabidopsis/genetics/*physiology	We identified FLY as a previously uncharacterized RNA-binding-family protein that controls flowering time by positively regulating the expression of FLC clade members. The ability of flowering plants to adjust the timing of the floral transition based on endogenous and environmental signals contributes to their adaptive success. In Arabidopsis thaliana, the MADS-domain protein FLOWERING LOCUS C (…	the ability of flowering plants to adjust the timing of the floral transition contributes to their adaptive success . how FLM/MAF genes are regulated requires further study . the knockout fly-1 mutant and FLY artificial microRNA knockdown line flowered earlier than the wild type .	Plant Cell Rep	39	12	1705-1717	1432-203X (Electronic)	10.1007/s00299-020-02598-w	https://www.ncbi.nlm.nih.gov/pubmed/32948902
Dai, Y. | Wang, Y. | Zeng, L. | Jia, R. | He, L. | Huang, X. | Zhao, H. | Liu, D. | Zhao, H. | Hu, S. | Gao, L. | Guo, A. | Xia, W. | Ji, C.	Sanya Nanfan Research Institution of Hainan University, Sanya 572025, China.	Genomic and Transcriptomic Insights into the Evolution and Divergence of MIKC-Type MADS-Box Genes in Carica papaya	Genomic and Transcriptomic Insights into the Evolution and Divergence of MIKC-Type MADS-Box Genes in Carica papaya	2023	*Transcriptome	MIKC-type MADS-box genes, also known as type II genes, play a crucial role in regulating the formation of floral organs and reproductive development in plants. However, the genome-wide identification and characterization of type II genes as well as a transcriptomic survey of their potential roles in Carica papaya remain unresolved. Here, we identified and characterized 24 type II genes in the C. …	gene duplication mainly contributed to MIKC-type gene formation in papaya . TT16-3 and AGL8 participated in male flower development and seed germination . the hub-network of male and female flowers and qRT-PCR suggested this .	Int J Mol Sci	24	18		1422-0067 (Electronic)	10.3390/ijms241814039	https://www.ncbi.nlm.nih.gov/pubmed/37762345
Daminato, M. | Masiero, S. | Resentini, F. | Lovisetto, A. | Casadoro, G.		Characterization of TM8, a MADS-box gene expressed in tomato flowers	Characterization of TM8, a MADS-box gene expressed in tomato flowers	2014	Flowers/genetics/growth & development/metabolism	BACKGROUND: The identity of flower organs is specified by various MIKC MADS-box transcription factors which act in a combinatorial manner. TM8 is a MADS-box gene that was isolated from the floral meristem of a tomato mutant more than twenty years ago, but is still poorly known from a functional point of view in spite of being present in both Angiosperms and Gymnosperms, with some species harbouri…	TM8 is a MADS-box gene that was isolated from the floral meristem of a tomato mutant more than twenty years ago . it is still poorly known from a functional point of view . a characterization of the gene was carried out in transgenic tomato plants .	BMC Plant Biol	14		319	1471-2229 (Electronic)	10.1186/s12870-014-0319-y	https://www.ncbi.nlm.nih.gov/pubmed/25433802
Dang, X. | Zhang, Y. | Li, Y. | Chen, S. | Liu, E. | Fang, B. | Liu, Q. | She, D. | Dong, Z. | Fan, Z. | Li, D. | Wang, H. | Zhu, S. | Hu, X. | Li, Y. | Jiang, J. | Hong, D.	State Key Laboratory of Crop Genetics and Germplasm Enhancement, Nanjing Agricultural University, Nanjing, 210095, China.	SYL3-k increases style length and yield of F (1) seeds via enhancement of endogenous GA (4) content in Oryza sativa L. pistils	SYL3-k increases style length and yield of F (1) seeds via enhancement of endogenous GA (4) content in Oryza sativa L. pistils	2022	Flowers/anatomy & histology/*genetics/metabolism	SYL3-k allele increases the outcrossing rate of male sterile line and the yield of hybrid F (1) seeds via enhancement of endogenous GA (4) content in Oryza sativa L. pistils. The change in style length might be an adaptation of rice cultivation from south to north in the northern hemisphere. The style length (SYL) in rice is one of the major factors influencing the stigma exertion, which affects …	qSYL3-k allele increases SYL via the elongation of cell length in the style . this is associated with a higher GA4 content in the pistil . the change in style length might be an adaptation of rice cultivation .	Theor Appl Genet	135	1	321-336	1432-2242 (Electronic)	10.1007/s00122-021-03968-y	https://www.ncbi.nlm.nih.gov/pubmed/34657161
Danilevskaya, O. N. | Meng, X. | Selinger, D. A. | Deschamps, S. | Hermon, P. | Vansant, G. | Gupta, R. | Ananiev, E. V. | Muszynski, M. G.	Pioneer Hi-Bred International, Inc., a DuPont Company, Johnston, Iowa 50131, USA. olga.danilevskaya@pioneer.com	Involvement of the MADS-box gene ZMM4 in floral induction and inflorescence development in maize	Involvement of the MADS-box gene ZMM4 in floral induction and inflorescence development in maize	2008	Chromosome Mapping	The switch from vegetative to reproductive growth is marked by the termination of vegetative development and the adoption of floral identity by the shoot apical meristem (SAM) . This process is called the floral transition. To elucidate the molecular determinants involved in this process, we performed genome-wide RNA expression profiling on maize (Zea mays) shoot apices at vegetative and early re…	the switch from vegetative to reproductive growth is marked by the termination of vegetative development and the adoption of floral identity by the shoot apical meristem (SAM) this process is called the floral transition . profiling revealed significant up-regulation of two maize MADS-box (ZMM) genes,ZMM4andZMM15 .	Plant Physiol	147	4	2054-69	0032-0889 (Print)	10.1104/pp.107.115261	https://www.ncbi.nlm.nih.gov/pubmed/18539775
Davies, B. | Egea-Cortines, M. | de Andrade Silva, E. | Saedler, H. | Sommer, H.	Department of Molecular Plant Genetics, Max-Planck-Institut fur Zuchtungsforschung, Koln, Germany.	Multiple interactions amongst floral homeotic MADS box proteins	Multiple interactions amongst floral homeotic MADS box proteins	1996	Amino Acid Sequence	Most known floral homeotic genes belong to the MADS box family and their products act in combination to specify floral organ identity by an unknown mechanism. We have used a yeast two-hybrid system to investigate the network of interactions between the Antirrhinum organ identity gene products. Selective heterodimerization is observed between MADS box factors. Exclusive interactions are detected b…	most known floral homeotic genes belong to the MADS box family . their products act in combination to specify floral organ identity by unknown mechanism . selective heterodimerization is observed between two factors, DEFICIENS and GLOBOSA .	EMBO J	15	16	4330-43	0261-4189 (Print)	10.1002/j.1460-2075.1996.tb00807.x	https://www.ncbi.nlm.nih.gov/pubmed/8861961
Davies, B. | Motte, P. | Keck, E. | Saedler, H. | Sommer, H. | Schwarz-Sommer, Z.	Leeds Institute for Plant Biotechnology and Agriculture, University of Leeds, Leeds LS2 9JT, UK.	PLENA and FARINELLI: redundancy and regulatory interactions between two Antirrhinum MADS-box factors controlling flower development	PLENA and FARINELLI: redundancy and regulatory interactions between two Antirrhinum MADS-box factors controlling flower development	1999	Amino Acid Sequence	We report the discovery of an Antirrhinum MADS-box gene, FARINELLI (FAR) , and the isolation of far mutants by a reverse genetic screen. Despite striking similarities between FAR and the class C MADS-box gene PLENA (PLE) , the phenotypes of their respective mutants are dramatically different. Unlike ple mutants, which show homeotic conversion of reproductive organs to perianth organs and a loss o…	antirrhinum MADS-box gene, FARINELLI (FAR), has been discovered . far mutants have normal flowers which are partially male-sterile . phenotypes of mutants in two highly related genes are dramatically different .	EMBO J	18	14	4023-34	0261-4189 (Print)	10.1093/emboj/18.14.4023	https://www.ncbi.nlm.nih.gov/pubmed/10406807
De Bodt, S. | Raes, J. | Florquin, K. | Rombauts, S. | Rouze, P. | Theissen, G. | Van de Peer, Y.	Department of Plant Systems Biology, Flanders Interuniversity Institute for Biotechnology, Ghent University, K.L Ledeganckstraat 35, Belgium.	Genomewide structural annotation and evolutionary analysis of the type I MADS-box genes in plants	Genomewide structural annotation and evolutionary analysis of the type I MADS-box genes in plants	2003	Amino Acid Motifs	The type I MADS-box genes constitute a largely unexplored subfamily of the extensively studied MADS-box gene family, well known for its role in flower development. Genes of the type I MADS-box subfamily possess the characteristic MADS box but are distinguished from type II MADS-box genes by the absence of the keratin-like box. In this in silico study, we have structurally annotated all 47 members…	phylogenetic trees were inferred to study the evolutionary relationships . type I MADS-box genes are a largely unexplored subfamily of the extensively studied gene family . almost nothing is known about the function of these type I genes .	J Mol Evol	56	5	573-86	0022-2844 (Print)	10.1007/s00239-002-2426-x	https://www.ncbi.nlm.nih.gov/pubmed/12698294
De Bodt, S. | Theissen, G. | Van de Peer, Y.	Department of Plant Systems Biology, Flanders Interuniversity Institute for Biotechnology, Ghent University, Ghent, Belgium.	Promoter analysis of MADS-box genes in eudicots through phylogenetic footprinting	Promoter analysis of MADS-box genes in eudicots through phylogenetic footprinting	2006	Arabidopsis/genetics	The MIKC MADS-box gene family has been shaped by extensive gene duplications giving rise to subfamilies of genes with distinct functions and expression patterns. However, within these subfamilies the functional assignment is not that clear-cut, and considerable functional redundancy exists. One way to investigate the diversity in regulation present in these subfamilies is promoter sequence analys…	the MIKC MADS-box gene family has been shaped by gene duplications . promoter sequence analysis has been used to investigate the diversity in regulation . sequences conserved between the promoters of homologous genes are thought to be functional .	Mol Biol Evol	23	6	1293-303	0737-4038 (Print)	10.1093/molbev/msk016	https://www.ncbi.nlm.nih.gov/pubmed/16581940
de Folter, S. | Immink, R. G. | Kieffer, M. | Parenicova, L. | Henz, S. R. | Weigel, D. | Busscher, M. | Kooiker, M. | Colombo, L. | Kater, M. M. | Davies, B. | Angenent, G. C.	Business Unit Bioscience, Plant Research International, 6700 AA Wageningen, The Netherlands.	Comprehensive interaction map of the Arabidopsis MADS Box transcription factors	Comprehensive interaction map of the Arabidopsis MADS Box transcription factors	2005	Arabidopsis/genetics/growth & development/*metabolism	Interactions between proteins are essential for their functioning and the biological processes they control. The elucidation of interaction maps based on yeast studies is a first step toward the understanding of molecular networks and provides a framework of proteins that possess the capacity and specificity to interact. Here, we present a comprehensive plant protein-protein interactome map of ne…	the elucidation of interaction maps based on yeast studies is a first step toward the understanding of molecular networks . a matrix-based yeast two-hybrid screen of >100 members of this family revealed a collection of specific heterodimers . clustering of proteins with similar interaction patterns pinpoints proteins involved in the same developmental program .	Plant Cell	17	5	1424-33	1040-4651 (Print)	10.1105/tpc.105.031831	https://www.ncbi.nlm.nih.gov/pubmed/15805477
de Folter, S. | Shchennikova, A. V. | Franken, J. | Busscher, M. | Baskar, R. | Grossniklaus, U. | Angenent, G. C. | Immink, R. G.	Business Unit Bioscience, Plant Research International, 6700 AA Wageningen, The Netherlands.	A Bsister MADS-box gene involved in ovule and seed development in petunia and Arabidopsis	A Bsister MADS-box gene involved in ovule and seed development in petunia and Arabidopsis	2006	Arabidopsis Proteins/genetics/*physiology	MADS-domain transcription factors are essential for proper flower and seed development in angiosperms and their role in determination of floral organ identity can be described by the 'ABC model' of flower development. Recently, close relatives of the B-type genes were identified by phylogenetic studies, which are referred to as B (sister) (B (s) ) genes. Here, we report the isolation and characte…	recently, close relatives of the B-type genes were identified by phylogenetic studies, which are referred to as B sister (B s ) genes . here, we report the isolation and characterization of a MADS-box B s member from petunia, designated FBP24 .	Plant J	47	6	934-46	0960-7412 (Print)	10.1111/j.1365-313X.2006.02846.x	https://www.ncbi.nlm.nih.gov/pubmed/16925602
Deng, W. | Ying, H. | Helliwell, C. A. | Taylor, J. M. | Peacock, W. J. | Dennis, E. S.	Commonwealth Scientific and Industrial Research Organisation Plant Industry, Canberra ACT 2600, Australia.	FLOWERING LOCUS C (FLC) regulates development pathways throughout the life cycle of Arabidopsis	FLOWERING LOCUS C (FLC) regulates development pathways throughout the life cycle of Arabidopsis	2011	Arabidopsis/genetics/*metabolism	FLOWERING LOCUS C (FLC) has a key role in the timing of the initiation of flowering in Arabidopsis. FLC binds and represses two genes that promote flowering, FT and SOC1. We show that FLC binds to many other genes, indicating that it has regulatory roles other than the repression of flowering. We identified 505 FLC binding sites, mostly located in the promoter regions of genes and containing at l…	FLOWERING LOCUS C (FLC) has a key role in the timing of flowering . it binds and represses two genes that promote flowering, FT and SOC1 . 20 of the target genes showed increased transcript levels in an flc mutant .	Proc Natl Acad Sci U S A	108	16	6680-5	1091-6490 (Electronic)	10.1073/pnas.1103175108	https://www.ncbi.nlm.nih.gov/pubmed/21464308
Dhakal, K. | Zhu, Q. | Zhang, B. | Li, M. | Li, S.	School of Plant and Environmental Sciences, Virginia Tech, Blacksburg, VA, United States.	Analysis of Shoot Architecture Traits in Edamame Reveals Potential Strategies to Improve Harvest Efficiency	Analysis of Shoot Architecture Traits in Edamame Reveals Potential Strategies to Improve Harvest Efficiency	2021	breeding	Edamame is a type of green, vegetable soybean and improving shoot architecture traits for edamame is important for breeding of high-yield varieties by decreasing potential loss due to harvesting. In this study, we use digital imaging technology and computer vision algorithms to characterize major traits of shoot architecture for edamame. Using a population of edamame PIs, we seek to identify unde…	edamame is a type of green, vegetable soybean . improving shoot architecture traits is important for breeding high-yield varieties .	Front Plant Sci	12		614926	1664-462X (Print)	10.3389/fpls.2021.614926	https://www.ncbi.nlm.nih.gov/pubmed/33746998
Di Marzo, M. | Herrera-Ubaldo, H. | Caporali, E. | Novak, O. | Strnad, M. | Balanza, V. | Ezquer, I. | Mendes, M. A. | de Folter, S. | Colombo, L.	Dipartimento di BioScienze, Universita degli Studi di Milano, Milan, Milan 20133, Italy.	SEEDSTICK Controls Arabidopsis Fruit Size by Regulating Cytokinin Levels and FRUITFULL	SEEDSTICK Controls Arabidopsis Fruit Size by Regulating Cytokinin Levels and FRUITFULL	2020	Arabidopsis/*anatomy & histology/genetics/growth & development	Upon fertilization, the ovary increases in size and undergoes a complex developmental process to become a fruit. We show that cytokinins (CKs) , which are required to determine ovary size before fertilization, have to be degraded to facilitate fruit growth. The expression of CKX7, which encodes a cytosolic CK-degrading enzyme, is directly positively regulated post-fertilization by the MADS-box tr…	upon fertilization, the ovary increases in size and undergoes a complex developmental process to become a fruit . cytokinins (CKs) have to be degraded to facilitate fruit growth .	Cell Rep	30	8	2846-2857 e3	2211-1247 (Electronic)	10.1016/j.celrep.2020.01.101	https://www.ncbi.nlm.nih.gov/pubmed/32101756
Di Marzo, M. | Roig-Villanova, I. | Zanchetti, E. | Caselli, F. | Gregis, V. | Bardetti, P. | Chiara, M. | Guazzotti, A. | Caporali, E. | Mendes, M. A. | Colombo, L. | Kater, M. M.	Dipartimento di Bioscienze, Universita degli Studi di Milano, Milan, Italy.	MADS-Box and bHLH Transcription Factors Coordinate Transmitting Tract Development in Arabidopsis thaliana	MADS-Box and bHLH Transcription Factors Coordinate Transmitting Tract Development in Arabidopsis thaliana	2020	MADS-box	The MADS-domain transcription factor SEEDSTICK (STK) controls several aspects of plant reproduction. STK is co-expressed with CESTA (CES) , a basic Helix-Loop-Helix (bHLH) transcription factor-encoding gene. CES was reported to control redundantly with the brassinosteroid positive signaling factors BRASSINOSTEROID ENHANCED EXPRESSION1 (BEE1) and BEE3 the development of the transmitting tract. Com…	the MADS-domain transcription factor italic>SEEDSTICK/italica> controls several aspects of plant reproduction . it is co-expressed with a basic Helix-Loop-Helix (bHLH) transcription factor-encoding gene . CES was reported to control redundantly with the brassinosteroid positive signaling factors .	Front Plant Sci	11		526	1664-462X (Print)	10.3389/fpls.2020.00526	https://www.ncbi.nlm.nih.gov/pubmed/32435255
Di Marzo, M. | Viana, V. E. | Banfi, C. | Cassina, V. | Corti, R. | Herrera-Ubaldo, H. | Babolin, N. | Guazzotti, A. | Kiegle, E. | Gregis, V. | de Folter, S. | Sampedro, J. | Mantegazza, F. | Colombo, L. | Ezquer, I.	Dipartimento di BioScienze, Universita degli Studi di Milano, Via Giovanni Celoria 26, 20133 Milan, Italy.	Cell wall modifications by alpha-XYLOSIDASE1 are required for control of seed and fruit size in Arabidopsis	Cell wall modifications by alpha-XYLOSIDASE1 are required for control of seed and fruit size in Arabidopsis	2022	*Arabidopsis/metabolism	Cell wall modifications are of pivotal importance during plant development. Among cell wall components, xyloglucans are the major hemicellulose polysaccharide in primary cell walls of dicots and non-graminaceous monocots. They can connect the cellulose microfibril surface to affect cell wall mechanical properties. Changes in xyloglucan structure are known to play an important role in regulating c…	cell wall modifications are of pivotal importance during plant development . xyloglucans are the major hemicellulose polysaccharide in primary cell walls of dicots . the degradation of the cellulose is an important modification that alters the cell wall .	J Exp Bot	73	5	1499-1515	1460-2431 (Electronic)	10.1093/jxb/erab514	https://www.ncbi.nlm.nih.gov/pubmed/34849721
Diaz-Riquelme, J. | Grimplet, J. | Martinez-Zapater, J. M. | Carmona, M. J.	Instituto de Ciencias de la Vid y del Vino (CSIC, Universidad de La Rioja, Gobierno de La Rioja) , CCT, C/ Madre de Dios 51, Logrono 26006, Spain.	Transcriptome variation along bud development in grapevine (Vitis vinifera L.)	Transcriptome variation along bud development in grapevine (Vitis vinifera L.)	2012	Cluster Analysis	BACKGROUND: Vegetative buds provide plants in temperate environments the possibility for growth and reproduction when environmental conditions are favorable. In grapevine, crucial developmental events take place within buds during two growing seasons in consecutive years. The first season, the shoot apical meristem within the bud differentiates all the basic elements of the shoot including flower…	gene expression changes were analyzed along the bud annual cycle at eight different time points . non dormant buds showed an enrichment in functional categories typical of actively proliferating cells . results suggest genes regulating flowering could also be involved in dormancy regulatory pathways .	BMC Plant Biol	12		181	1471-2229 (Electronic)	10.1186/1471-2229-12-181	https://www.ncbi.nlm.nih.gov/pubmed/23035802
Digel, B. | Tavakol, E. | Verderio, G. | Tondelli, A. | Xu, X. | Cattivelli, L. | Rossini, L. | von Korff, M.	Max Planck Institute for Plant Breeding Research, D-50829 Cologne, Germany (B.D., M.v.K.);Institute of Plant Genetics, Heinrich-Heine-University, 40225 Duesseldorf, Germany (B.D., M.v.K.);Cluster of Excellence on Plant Sciences "From Complex Traits Towards Synthetic Modules," 40225 Duesseldorf, Germany (B.D., M.v.K.);Universita degli Studi di Milano-DiSAA, 20133 Milan, Italy (E.T., G.V., L.R.);De…	Photoperiod-H1 (Ppd-H1) Controls Leaf Size	Photoperiod-H1 (Ppd-H1) Controls Leaf Size	2016	Chromosome Mapping	Leaf size is a major determinant of plant photosynthetic activity and biomass; however, it is poorly understood how leaf size is genetically controlled in cereal crop plants like barley (Hordeum vulgare). We conducted a genome-wide association scan for flowering time, leaf width, and leaf length in a diverse panel of European winter cultivars grown in the field and genotyped with a single-nucleot…	barley is a major determinant of plant photosynthetic activity and biomass . it is poorly understood how leaf size is genetically controlled in cereal crop plants . the coordination of leaf growth with flowering may be part of a reproductive strategy .	Plant Physiol	172	1	405-15	1532-2548 (Electronic)	10.1104/pp.16.00977	https://www.ncbi.nlm.nih.gov/pubmed/27457126
Ding, L. | Wang, Y. | Yu, H.	Department of Biological Sciences, Faculty of Science, National University of Singapore, Singapore 117543, Singapore.	Overexpression of DOSOC1, an ortholog of Arabidopsis SOC1, promotes flowering in the orchids Dendrobium Chao Parya Smile	Overexpression of DOSOC1, an ortholog of Arabidopsis SOC1, promotes flowering in the orchids Dendrobium Chao Parya Smile	2013	Arabidopsis Proteins/*metabolism	SUPPRESSOR OF OVEREXPRESSION OF CONSTANS1 (SOC1) encodes a MADS-box protein that plays an essential role in integrating multiple flowering signals to regulate the transition from vegetative to reproductive development in the model plant Arabidopsis. Although SOC1-like genes have been isolated in various angiosperms, its orthologs in Orchidaceae, one of the largest families of flowering plants, ar…	SUPPRESSOR OF OVEREXPRESSION OF CONSTANS1 (SOC1) encodes a MADS-box protein . its orthologs in Orchidaceae, one of the largest families of flowering plants, are so far unknown . we isolated a SOC1-like gene, DOSOC1, from Dendrobium Chao Praya Smile .	Plant Cell Physiol	54	4	595-608	1471-9053 (Electronic)	10.1093/pcp/pct026	https://www.ncbi.nlm.nih.gov/pubmed/23396600
Distelfeld, A. | Dubcovsky, J.	Department of Plant Sciences, University of California, Davis, CA 95616, USA.	Characterization of the maintained vegetative phase deletions from diploid wheat and their effect on VRN2 and FT transcript levels	Characterization of the maintained vegetative phase deletions from diploid wheat and their effect on VRN2 and FT transcript levels	2010	Carrier Proteins/genetics	Allelic differences at the VRN1 (AP1/CAL/FRU) , VRN2 (ZCCT) and VRN3 (FT) vernalization genes affect flowering time in wheat. The two maintained vegetative phase (mvp) mutants from Triticum monococcum L., previously reported as carrying a single gene (VRN1) deletion, are incapable of flowering. In this study, we show that both mvp lines have larger deletions that include the genes AGLG1, CYS, PHY…	two maintained vegetative phase (mvp) mutants are incapable of flowering . a single gene (VRN1) deletion is an unlikely cause of the down-regulation of VRN2 . alternative hypotheses including combinations of other genes can't be ruled out .	Mol Genet Genomics	283	3	223-32	1617-4623 (Electronic)	10.1007/s00438-009-0510-2	https://www.ncbi.nlm.nih.gov/pubmed/20063107
Ditta, G. | Pinyopich, A. | Robles, P. | Pelaz, S. | Yanofsky, M. F.	Section of Cell and Developmental Biology, University of California, San Diego, 9500 Gilman Drive, Department 0116, La Jolla, CA 92093, USA.	The SEP4 gene of Arabidopsis thaliana functions in floral organ and meristem identity	The SEP4 gene of Arabidopsis thaliana functions in floral organ and meristem identity	2004	Amino Acid Sequence	The ABC model of flower organ identity is widely recognized as providing a framework for understanding the specification of flower organs in diverse plant species. Recent studies in Arabidopsis thaliana have shown that three closely related MADS-box genes, SEPALLATA1 (SEP1) , SEP2 and SEP3, are required to specify petals, stamens, and carpels because these organs are converted into sepals in sep1…	three closely related MADS-box genes are required to specify petals, stamens, and carpels . these organs are converted into leaf-like organs in i>sep1 sep2 sep3 sep4/i> quadruple mutants, indicating the involvement of all four genes .	Curr Biol	14	21	1935-40	0960-9822 (Print)	10.1016/j.cub.2004.10.028	https://www.ncbi.nlm.nih.gov/pubmed/15530395
Do, V. G. | Lee, Y. | Kim, S. | Yang, S. | Park, J. | Do, G.	apple (Malus domesticus) Research Institute, National Institute of Horticultural and Herbal Science, Rural Development Administration, Gunwi 39000, Republic of Korea.	Introducing MdTFL1 Promotes Heading Date and Produces Semi-Draft Phenotype in Rice	Introducing MdTFL1 Promotes Heading Date and Produces Semi-Draft Phenotype in Rice	2023	*Plant Proteins/genetics/metabolism	Flowering time (in rice, termed the heading date) , plant height, and grain number are crucial agronomic traits for rice productivity. The heading date is controlled via environmental factors (day length and temperature) and genetic factors (floral genes) . TERMINAL FLOWER 1 (TFL1) encodes a protein that controls meristem identity and participates in regulating flowering. In this study, a transge…	a transgenic approach was used to promote the heading date in rice . antisense MdTFL1 upregulated multiple endogenous floral meristem identity genes . transgenic rice exhibited a semi-draft phenotype, increased leaf inclination angle, restricted flag leaf length, reduced spikelet fertility .	Int J Mol Sci	24	12		1422-0067 (Electronic)	10.3390/ijms241210365	https://www.ncbi.nlm.nih.gov/pubmed/37373512
Dong, T. | Hu, Z. | Deng, L. | Wang, Y. | Zhu, M. | Zhang, J. | Chen, G.	Key Laboratory of Biorheological Science and Technology, Ministry of Education, Bioengineering College, Chongqing University, Chongqing 400044, People's Republic of China.	A tomato MADS-box transcription factor, SlMADS1, acts as a negative regulator of fruit ripening	A tomato MADS-box transcription factor, SlMADS1, acts as a negative regulator of fruit ripening	2013	Carotenoids/metabolism	MADS-box genes encode a highly conserved gene family of transcriptional factors that regulate numerous developmental processes in plants. In this study, a tomato (Solanum lycopersicum) MADS-box gene, SlMADS1, was cloned and its tissue-specific expression profile was analyzed. The real-time polymerase chain reaction results showed that SlMADS1 was highly expressed in sepals and fruits; its express…	a tomato (Solanum lycopersicum) MADS-box gene,SlMADS1, was cloned . its expression level was increased with the development of sepals, while its transcript decreased .	Plant Physiol	163	2	1026-36	1532-2548 (Electronic)	10.1104/pp.113.224436	https://www.ncbi.nlm.nih.gov/pubmed/24006286
Dong, TingTing | Song, WeiHan | Tan, ChuanTing | Zhou, Zhilin | Yu, JiaWen | Han, RongPeng | Zhu, MingKu | Li, ZongYun | Saranga, Yehoshua		Molecular characterization of nine sweet_potato (Ipomoea batatas Lam.) MADSâbox transcription factors during storage root development and following abiotic stress	Molecular characterization of nine sweet_potato (Ipomoea batatas Lam.) MADSâbox transcription factors during storage root development and following abiotic stress	2018		sweet_potato is an important plant for researchers to study storage root development and resistance. MADSâbox proteins are a group of important transcription factors which play a crucial role in plant development as well as stress response. However, the investigation regarding sweet_potato MADSâbox genes remains limited up to now. In this study, nine MADSâbox genes, named as IbMBP1ËIbMBP9,…	sweet potato is an important plant for researchers to study storage root development and resistance . MADS-box proteins are a group of important transcription factors which play a crucial role in plant development and stress response . nine genes exhibited different tissue-specific expression profiles .	Plant Breeding	137	5	790-804	0179-9541	10.1111/pbr.12613	https://www.semanticscholar.org/paper/dc1f29405811db47dce9a9a9af2a2524ca6a4fc7
Dong, X. | Zhang, L. P. | Tang, Y. H. | Yu, D. | Cheng, F. | Dong, Y. X. | Jiang, X. D. | Qian, F. M. | Guo, Z. H. | Hu, J. Y.	CAS Key Laboratory for Plant Diversity and Biogeography of East Asia, Kunming Institute of Botany, Chinese Academy of Sciences, Kunming 650201, Yunnan Province, China.	Arabidopsis AGAMOUS-LIKE16 and SUPPRESSOR OF CONSTANS1 regulate the genome-wide expression and flowering time	Arabidopsis AGAMOUS-LIKE16 and SUPPRESSOR OF CONSTANS1 regulate the genome-wide expression and flowering time	2023	*Arabidopsis/metabolism	Flowering transition is tightly coordinated by complex gene regulatory networks, in which AGAMOUS-LIKE 16 (AGL16) plays important roles. Here, we identified the molecular function and binding properties of AGL16 and demonstrated its partial dependency on the SUPPRESSOR OF CONSTANS 1 (SOC1) function in regulating flowering. AGL16 bound to promoters of more than 2,000 genes via CArG-box motifs with…	flowering transition tightly coordinated by complex gene regulatory networks . AGL16 bound to promoters of more than 2,000 genes via CArG-box motifs . Approximately 70 flowering genes involved in multiple pathways were potential targets .	Plant Physiol	192	1	154-169	1532-2548 (Electronic)	10.1093/plphys/kiad058	https://www.ncbi.nlm.nih.gov/pubmed/36721922
Dorca-Fornell, C. | Gregis, V. | Grandi, V. | Coupland, G. | Colombo, L. | Kater, M. M.	Dipartimento di Biologia, Universita degli Studi di Milano, via Celoria 26, 20133 Milano, Italy.	The Arabidopsis SOC1-like genes AGL42, AGL71 and AGL72 promote flowering in the shoot apical and axillary meristems	The Arabidopsis SOC1-like genes AGL42, AGL71 and AGL72 promote flowering in the shoot apical and axillary meristems	2011	Arabidopsis/*genetics/*growth & development	The floral transition is the switch from vegetative development to flowering. Proper timing of the floral transition is regulated by different pathways and is critical for the reproductive success of plants. Some of the flowering pathways are controlled by environmental signals such as photoperiod and vernalization, others by autonomous signals such as the developmental state of the plant and hor…	the floral transition is the switch from vegetative development to flowering . it is regulated by different pathways and is critical for the reproductive success of plants . SUPPRESSOR OF OVEREXPRESSION OF CO 1 (SOC1) is an integrative centre of these pathways .	Plant J	67	6	1006-17	1365-313X (Electronic)	10.1111/j.1365-313X.2011.04653.x	https://www.ncbi.nlm.nih.gov/pubmed/21609362
Dreni, L. | Ferrandiz, C.	Instituto de Biologia Molecular y Celular de Plantas (IBMCP) , Consejo Superior de Investigaciones Cientificas-Universidad Politecnica de Valencia, 46022 Valencia, Spain.	Tracing the Evolution of the SEPALLATA Subfamily across Angiosperms Associated with Neo- and Sub-Functionalization for Reproductive and Agronomically Relevant Traits	Tracing the Evolution of the SEPALLATA Subfamily across Angiosperms Associated with Neo- and Sub-Functionalization for Reproductive and Agronomically Relevant Traits	2022	MADS-box	SEPALLATA transcription factors (SEP TFs) have been extensively studied in angiosperms as pivotal components of virtually all the MADS-box tetrameric complex master regulators of floral organ identities. However, there are published reports that suggest that some SEP members also regulate earlier reproductive events, such as inflorescence meristem determinacy and inflorescence architecture, with …	reports suggest some SEP members regulate earlier reproductive events . phylogeny of SEP3 clade highly specialized for specification of three innermost floral whorls . larger pool of angiosperm SEP genes confirms evidence evolution was driven by whole-genome duplications rather than small-scale duplication events.	Plants (Basel)	11	21		2223-7747 (Print)	10.3390/plants11212934	https://www.ncbi.nlm.nih.gov/pubmed/36365387
Dreni, L. | Jacchia, S. | Fornara, F. | Fornari, M. | Ouwerkerk, P. B. | An, G. | Colombo, L. | Kater, M. M.	Dipartimento di Scienze Biomolecolari e Biotecnologie, Universita degli Studi di Milano, Via Celoria 26, 20133 Milan, Italy.	The D-lineage MADS-box gene OsMADS13 controls ovule identity in rice	The D-lineage MADS-box gene OsMADS13 controls ovule identity in rice	2007	Amino Acid Sequence	Genes that control ovule identity were first identified in Petunia. Co-suppression of both FLORAL BINDING PROTEIN 7 (FBP7) and FBP11, two D-lineage genes, resulted in the homeotic transformation of ovules into carpelloid structures. Later in Arabidopsis it was shown that three genes, SHATTERPROOF1 (SHP1) , SHP2, and SEEDSTICK (STK) , redundantly control ovule identity, because in the stk shp1 shp…	co-suppression of both FBP7 and FBP11 resulted in the homeotic transformation of ovules into carpelloid structures . later in Arabidopsis it was shown that three genes, SHATTERPROOF1 ( SHP1 ), SHP2 and SEEDSTICK ( STK ), redundantly control .	Plant J	52	4	690-9	0960-7412 (Print)	10.1111/j.1365-313X.2007.03272.x	https://www.ncbi.nlm.nih.gov/pubmed/17877710
Dreni, L. | Zhang, D.	Joint International Research Laboratory of Metabolic and Developmental Sciences, Shanghai Jiao Tong University (SJTU) -University of Adelaide Joint Centre for Agriculture and Health, State Key Laboratory of Hybrid Rice, School of Life Sciences and Biotechnology, Shanghai Jiao Tong University, 800 Dongchuan Road, Shanghai 200240, China ludovico.dreni@sjtu.edu.cn.	Flower development: the evolutionary history and functions of the AGL6 subfamily MADS-box genes	Flower development: the evolutionary history and functions of the AGL6 subfamily MADS-box genes	2016	*Evolution, Molecular	AGL6 is an ancient subfamily of MADS-box genes found in both gymnosperms and angiosperms. Its functions remained elusive despite the fact that the MADS-box genes and the ABC model have been studied for >20 years. Nevertheless, recent discoveries in petunia, rice, and maize support its involvement in the 'E' function of floral development, very similar to the closely related AGL2 (SEPALLATA) subfa…	recent discoveries in petunia, rice, and maize support its involvement in the âEâ function of floral development, very similar to the closely relatedAGL2(SEPALLATA) subfamily . theAGL6genes are involved in floral meristem regulation, in floral organs, and ovule (integument) and seed development .	J Exp Bot	67	6	1625-38	1460-2431 (Electronic)	10.1093/jxb/erw046	https://www.ncbi.nlm.nih.gov/pubmed/26956504
Du, Y. | Lunde, C. | Li, Y. | Jackson, D. | Hake, S. | Zhang, Z.	National Key Laboratory of Crop Genetic Improvement, Huazhong Agricultural University, Wuhan 430070, P.R. China.	Gene duplication at the Fascicled ear1 locus controls the fate of inflorescence meristem cells in maize	Gene duplication at the Fascicled ear1 locus controls the fate of inflorescence meristem cells in maize	2021	Flowers/genetics/growth & development	Plant meristems are self-renewing groups of pluripotent stem cells that produce lateral organs in a stereotypical pattern. Of interest is how the radially symmetrical meristem produces laminar lateral organs. Both the male and female inflorescence meristems of the dominant Fascicled ear (Fas1) mutant fail to grow as a single point and instead show deep branching. Positional cloning of two indepen…	plant meristems are self-renewing groups of pluripotent stem cells . they produce lateral organs in a stereotypical pattern . mutants fail to grow as a single point and instead show deep branching .	Proc Natl Acad Sci U S A	118	7		1091-6490 (Electronic)	10.1073/pnas.2019218118	https://www.ncbi.nlm.nih.gov/pubmed/33579824
Duan, K. | Li, L. | Hu, P. | Xu, S. P. | Xu, Z. H. | Xue, H. W.	Key Laboratory of Photosynthesis and Environmental Molecular Physiology, Institute of Botany, Chinese Academy of Sciences, 20 Nanxincun Road, 100093 Beijing, China.	A brassinolide-suppressed rice MADS-box transcription factor, OsMDP1, has a negative regulatory role in BR signaling	A brassinolide-suppressed rice MADS-box transcription factor, OsMDP1, has a negative regulatory role in BR signaling	2006	Amino Acid Sequence	The MADS-box transcription factor-encoding genes are expressed mainly during plant reproductive development, where they play important roles in controlling floral organ initiation and identity. Few previous reports have investigated the functions of MADS-box transcription factors expressed in vegetative tissues. Here we describe the functional characterization of a rice AG-like MADS-box protein, …	the MADS-box transcription factor-encoding genes are expressed mainly during plant reproductive development . they play important roles in controlling floral organ initiation and identity . the protein, OsMDP1, is transcribed mainly in vegetative tissues .	Plant J	47	4	519-31	0960-7412 (Print)	10.1111/j.1365-313X.2006.02804.x	https://www.ncbi.nlm.nih.gov/pubmed/16827922
Egea-Cortines, M. | Saedler, H. | Sommer, H.	Max-Planck-Institut fur Zuchtungsforschung, Carl-von-Linne Weg 10, 50829 Koln, Germany. Marcos.Egea@etsia.upct.es	Ternary complex formation between the MADS-box proteins SQUAMOSA, DEFICIENS and GLOBOSA is involved in the control of floral architecture in Antirrhinum majus	Ternary complex formation between the MADS-box proteins SQUAMOSA, DEFICIENS and GLOBOSA is involved in the control of floral architecture in Antirrhinum majus	1999	Base Sequence	In Antirrhinum, floral meristems are established by meristem identity genes. Floral meristems give rise to floral organs in whorls, with their identity established by combinatorial activities of organ identity genes. Double mutants of the floral meristem identity gene SQUAMOSA and organ identity genes DEFICIENS or GLOBOSA produce flowers in which whorled patterning is partially lost. In yeast, SQ…	floral meristems give rise to floral organs in whorls, with their identity established by combinatorial activities of organ identity genes . in yeast, SQUA, DEF and GLO proteins form ternary complexes .	EMBO J	18	19	5370-9	0261-4189 (Print)	10.1093/emboj/18.19.5370	https://www.ncbi.nlm.nih.gov/pubmed/10508169
Ehlers, K. | Bhide, A. S. | Tekleyohans, D. G. | Wittkop, B. | Snowdon, R. J. | Becker, A.	Justus Liebig University, Institute of Botany, Heinrich-Buff-Ring 38, D-35392, Giessen, Germany.	The MADS Box Genes ABS, SHP1, and SHP2 Are Essential for the Coordination of Cell Divisions in Ovule and Seed Coat Development and for Endosperm Formation in Arabidopsis thaliana	The MADS Box Genes ABS, SHP1, and SHP2 Are Essential for the Coordination of Cell Divisions in Ovule and Seed Coat Development and for Endosperm Formation in Arabidopsis thaliana	2016	Arabidopsis/genetics/*physiology	Seed formation is a pivotal process in plant reproduction and dispersal. It begins with megagametophyte development in the ovule, followed by fertilization and subsequently coordinated development of embryo, endosperm, and maternal seed coat. Two closely related MADS-box genes, SHATTERPROOF 1 and 2 (SHP1 and SHP2) are involved in specifying ovule integument identity in Arabidopsis thaliana. The M…	seed formation is a pivotal process in plant reproduction and dispersal . two closely related MADS-box genes are involved in specifying ovule integument identity . little is known about the genetic interaction of SHP1 and SHP2 with ABS .	PLoS One	11	10	e0165075	1932-6203 (Electronic)	10.1371/journal.pone.0165075	https://www.ncbi.nlm.nih.gov/pubmed/27776173
Elitzur, T. | Vrebalov, J. | Giovannoni, J. J. | Goldschmidt, E. E. | Friedman, H.	Department of Postharvest Science of Fresh Produce, Agricultural Research Organization (ARO) , the Volcani Center, PO Box 6, Bet Dagan 50250, Israel.	The regulation of MADS-box gene expression during ripening of banana and their regulatory interaction with ethylene	The regulation of MADS-box gene expression during ripening of banana and their regulatory interaction with ethylene	2010	Ethylenes/*metabolism	Six MaMADS-box genes have been cloned from the banana fruit cultivar Grand Nain. The similarity of these genes to tomato LeRIN is low and neither MaMADS2 nor MaMADS1 complement the tomato rin mutation. Nevertheless, the expression patterns, specifically in fruit and the induction during ripening and in response to ethylene and 1-MCP, suggest that some of these genes may participate in ripening. M…	sixMaMADS-box genes have been cloned from the banana fruit cultivarGrand Nain . the similarity of these genes to tomatoLeRINis low . but the expression patterns suggest that some of them may participate in ripening .	J Exp Bot	61	5	1523-35	1460-2431 (Electronic)	10.1093/jxb/erq017	https://www.ncbi.nlm.nih.gov/pubmed/20200120
Elo, A. | Lemmetyinen, J. | Turunen, M. L. | Tikka, L. | Sopanen, T.	Department of Biology, University of Joensuu, PO Box 111, FIN-80101 Joensuu, Finland.	Three MADS-box genes similar to APETALA1 and FRUITFULL from silver birch (Betula pendula)	Three MADS-box genes similar to APETALA1 and FRUITFULL from silver birch (Betula pendula)	2001		Despite intensive research on genetic regulation of flower development there are still only a few studies on the early phases of this process in perennial plants like trees. The aim of this study has been to identify genes that regulate early stages of inflorescence development in silver birch (Betula pendula Roth) and to follow the expression of these genes during development of the unisexual bi…	cloning and characterization of 3 cDNAs representing MADS-box genes . all 3 genes are active during the development of both male and female inflorescences . differences in patterns of expression suggest that they play different roles .	Physiol Plant	112	1	95-103	1399-3054 (Electronic)	10.1034/j.1399-3054.2001.1120113.x	https://www.ncbi.nlm.nih.gov/pubmed/11319020
Erdmann, R. | Gramzow, L. | Melzer, R. | Theissen, G. | Becker, A.	University of Bremen, Department of Biology and Chemistry, Plant Evo-Devo Group, Leobener Strasse, 28359 Bremen, Germany.	GORDITA (AGL63) is a young paralog of the Arabidopsis thaliana B (sister) MADS box gene ABS (TT16) that has undergone neofunctionalization	GORDITA (AGL63) is a young paralog of the Arabidopsis thaliana B (sister) MADS box gene ABS (TT16) that has undergone neofunctionalization	2010	Arabidopsis/genetics/*metabolism	MIKC-type MADS domain proteins are key regulators of flower development in angiosperms. B (sister) genes constitute a clade with a close relationship to class B floral homeotic genes, and have been conserved for more than 300 million years. The loss-of-function phenotype of the A. thaliana B (sister) gene ABS is mild: mutants show reduced seed coloration and defects in endothelium development. Th…	MIKC-type MADS domain proteins are key regulators of flower development in angiosperms . mutants show reduced seed coloration and defects in endothelium development . this study focuses on GORDITA ( GOA , formerly known as AGL63 ), the most closely related paralog of ABS in A. thaliana .	Plant J	63	6	914-24	1365-313X (Electronic)	10.1111/j.1365-313X.2010.04290.x	https://www.ncbi.nlm.nih.gov/pubmed/20598091
Falavigna, V. D. S. | Guitton, B. | Costes, E. | Andres, F.	Amelioration Genetique et Adaptation des Plantes Mediterraneennes et Tropicales, Universite de Montpellier, Centre de Cooperation Internationale en Recherche Agronomique pour le Developpement, Institut National de la Recherche Agronomique, Montpellier SupAgro, Montpellier, France.	I Want to (Bud) Break Free: The Potential Role of DAM and SVP-Like Genes in Regulating Dormancy Cycle in Temperate Fruit Trees	I Want to (Bud) Break Free: The Potential Role of DAM and SVP-Like Genes in Regulating Dormancy Cycle in Temperate Fruit Trees	2018	MADS-box family transcription factors	Bud dormancy is an adaptive process that allows trees to survive the hard environmental conditions that they experience during the winter of temperate climates. Dormancy is characterized by the reduction in meristematic activity and the absence of visible growth. A prolonged exposure to cold temperatures is required to allow the bud resuming growth in response to warm temperatures. In fruit tree …	bud dormancy is an adaptive process that allows trees to survive the hard environmental conditions . a prolonged exposure to cold temperatures is required to allow the bud resuming growth in response to warm temperatures .	Front Plant Sci	9		1990	1664-462X (Print)	10.3389/fpls.2018.01990	https://www.ncbi.nlm.nih.gov/pubmed/30687377
Fan, C. M. | Wang, X. | Wang, Y. W. | Hu, R. B. | Zhang, X. M. | Chen, J. X. | Fu, Y. F.	MOA Key Lab of Soybean Biology Beijing, National Key Facility of Crop Gene Resource and Genetic Improvement, Institute of Crop Sciences, Chinese Academy of Agricultural Sciences, Beijing, China.		Genome-wide expression analysis of soybean MADS genes showing potential function in the seed development	2013	Gene Expression Regulation, Plant	The MADS family is an ancient and best-studied transcription factor and plays fundamental roles in almost every developmental process in plants. In the plant evolutionary history, the whole genome duplication (WGD) events are important not only to the plant species evolution, but to expansion of members of the gene families. Soybean as a model legume crop has experience three rounds of WGD events…	whole genome duplication (WGD) events are important in plant evolution . members of some MIKCC subfamilies expanded after soybean three rounds of WGD . 137 out of 163 MADS genes were close to 186 loci within 2 Mb genomic regions .	PLoS One	8	4	e62288	1932-6203 (Electronic)	10.1371/journal.pone.0062288	https://www.ncbi.nlm.nih.gov/pubmed/23638026
Fan, J. | Huang, J. | Pu, Y. | Niu, Y. | Zhang, M. | Dai, S. | Huang, H.	Beijing Advanced Innovation Center for Tree Breeding By Molecular Design, Beijing Key Laboratory of Ornamental Plants Germplasm Innovation & Molecular Breeding, Beijing Laboratory of Urban and Rural Ecological Environment, Key Laboratory of Genetics and Breeding in Forest Trees and Ornamental Plants of Education Ministry, School of Landscape Architecture, National Engineering Research Center for …	Transcriptomic analysis reveals the formation mechanism of anemone-type flower in chrysanthemum	Transcriptomic analysis reveals the formation mechanism of anemone-type flower in chrysanthemum	2022	*Transcriptome	BACKGROUND: The ray and disc florets on the chrysanthemum capitulum are morphologically diverse and have remarkably abundant variant types, resulting in a rich variety of flower types. An anemone shape with pigmented and elongated disk florets is an important trait in flower shape breeding of chrysanthemums. The regulatory mechanism of their anemone-type disc floret formation was not clear, thus …	anemone-type disc florets are an important trait in flower shape breeding of chrysanthemums . morphological differences occurred mainly during the petal elongation period . findings suggest a regulatory network for forming non-anemone-type . the auxin and jasmonate signaling pathways might play a vital role .	BMC Genomics	23	1	846	1471-2164 (Electronic)	10.1186/s12864-022-09078-3	https://www.ncbi.nlm.nih.gov/pubmed/36544087
Fan, J. | Li, W. | Dong, X. | Guo, W. | Shu, H.	College of Forestry, Shandong Agricultural University, Taian 271018, China. hjf2003@sdau.edu.cn	Ectopic expression of a hyacinth AGL6 homolog caused earlier flowering and homeotic conversion in Arabidopsis	Ectopic expression of a hyacinth AGL6 homolog caused earlier flowering and homeotic conversion in Arabidopsis	2007	Amino Acid Sequence	MADS-box genes are involved in floral organ development. Here we report that an AGL6 (Agamous-like 6) -like MADS-box gene, HoAGL6, was isolated from Hyacinthus orientalis L. Expression pattern analysis demonstrated that HoAGL6 transcript was detected in inflorescence buds, tepals, carpels and ovules, but not in stamina, leaves or scales. Transgenic Arabidopsis plants ectopically expressing HoAGL6…	an AGL6-like MADS-box gene, HoAGL6, was isolated from Hyacinthus orientalis L. RT-PCR analysis indicated that expression levels of flowering time gene SOC1 and flower meristem identity gene LFY were significantly up-regulated .	Sci China C Life Sci	50	5	676-89	1006-9305 (Print)	10.1007/s11427-007-0083-4	https://www.ncbi.nlm.nih.gov/pubmed/17879068
Fang, Z. Z. | Lin-Wang, K. | Dai, H. | Zhou, D. R. | Jiang, C. C. | Espley, R. V. | Deng, C. | Lin, Y. J. | Pan, S. L. | Ye, X. F.	Fruit Research Institute, Fujian Academy of Agricultural Sciences, Fuzhou, Fujian, China.	The genome of low-chill Chinese plum "Sanyueli" (Prunus salicina Lindl.) provides insights into the regulation of the chilling requirement of flower buds	The genome of low-chill Chinese plum "Sanyueli" (Prunus salicina Lindl.) provides insights into the regulation of the chilling requirement of flower buds	2022	China	Chinese plum (Prunus salicina Lindl.) is a stone fruit that belongs to the Prunus genus and plays an important role in the global production of plum. In this study, we report the genome sequence of the Chinese plum "Sanyueli", which is known to have a low-chill requirement for flower bud break. The assembled genome size was 282.38 Mb, with a contig N50 of 1.37 Mb. Over 99% of the assembly was anc…	the genome sequence of the Chinese plum ÒSanyueliÓ is known to have a low-chill requirement for flower bud break . bud dormancy is influenced by chilling requirement in plum and partly controlled by DORMANCY ASSOCIATED MADS - box genes .	Mol Ecol Resour	22	5	1919-1938	1755-0998 (Electronic)	10.1111/1755-0998.13585	https://www.ncbi.nlm.nih.gov/pubmed/35032338
Fatima, M. | Zhang, X. | Lin, J. | Zhou, P. | Zhou, D. | Ming, R.	College of Agriculture, FAFU and UIUC-SIB Joint Center for Genomics and Biotechnology, National Sugarcane Engineering Technology Research Center, Fujian Provincial Key Laboratory of Haixia Applied Plant Systems Biology, Fujian Agriculture and Forestry University, Fuzhou, 350002, Fujian, People's Republic of China.	Expression profiling of MADS-box gene family revealed its role in vegetative development and stem ripening in S. spontaneum	Expression profiling of MADS-box gene family revealed its role in vegetative development and stem ripening in S. spontaneum	2020	Alleles	Sugarcane is the most important sugar and biofuel crop. MADS-box genes encode transcription factors that are involved in developmental control and signal transduction in plants. Systematic analyses of MADS-box genes have been reported in many plant species, but its identification and characterization were not possible until a reference genome of autotetraploid wild type sugarcane specie, Saccharu…	sugarcane is the most important sugar and biofuel crop . MADS-box genes encode transcription factors that are involved in developmental control . qRT-PCR analysis suggested flower timing genes may regulate vegetative development . the study was performed in leaves, roots, stem sections and after hormones treatment .	Sci Rep	10	1	20536	2045-2322 (Electronic)	10.1038/s41598-020-77375-6	https://www.ncbi.nlm.nih.gov/pubmed/33239664
Favaro, R. | Pinyopich, A. | Battaglia, R. | Kooiker, M. | Borghi, L. | Ditta, G. | Yanofsky, M. F. | Kater, M. M. | Colombo, L.	Dipartimento di Biologia, Universita di Milano, 20133 Milano, Italy.	MADS-box protein complexes control carpel and ovule development in Arabidopsis	MADS-box protein complexes control carpel and ovule development in Arabidopsis	2003	AGAMOUS Protein, Arabidopsis/genetics/metabolism	The AGAMOUS (AG) gene is necessary for stamen and carpel development and is part of a monophyletic clade of MADS-box genes that also includes SHATTERPROOF1 (SHP1) , SHP2, and SEEDSTICK (STK) . Here, we show that ectopic expression of either the STK or SHP gene is sufficient to induce the transformation of sepals into carpeloid organs bearing ovules. Moreover, the fact that these organ transformat…	theAGAMOUS(AG) gene is necessary for stamen and carpel development . it is part of a monophyletic clade of MADS-box genes . ectopic expression of either theSTKorSHPgene is sufficient to induce organ transformation .	Plant Cell	15	11	2603-11	1040-4651 (Print)	10.1105/tpc.015123	https://www.ncbi.nlm.nih.gov/pubmed/14555696
Fei, X. | Shi, Q. | Qi, Y. | Wang, S. | Lei, Y. | Hu, H. | Liu, Y. | Yang, T. | Wei, A.	College of Forestry, Northwest Agriculture and Forestry University, Yangling, Shaanxi, China.	ZbAGL11, a class D MADS-box transcription factor of Zanthoxylum bungeanum, is involved in sporophytic apomixis	ZbAGL11, a class D MADS-box transcription factor of Zanthoxylum bungeanum, is involved in sporophytic apomixis	2021		Apomixis is a reproductive model that bypasses sexual reproduction, so it does not require the combination of paternal and maternal gametes but instead results in the production of offspring directly from maternal tissues. This reproductive mode results in the same genetic material in the mother and the offspring and has significant applications in agricultural breeding. Molecular and cytological…	apomixis is a reproductive model that bypasses sexual reproduction . it results in the production of offspring directly from maternal tissues . the apomictic type of ZB has significant applications in agricultural breeding . overexpression of ZbAGL11-OEArabidopsis produced fertile offspring .	Hortic Res	8	1	23	2662-6810 (Print)	10.1038/s41438-020-00459-x	https://www.ncbi.nlm.nih.gov/pubmed/33518706
Feng, T. | Wang, L. | Li, L. | Liu, Y. | Chong, K. | Theissen, G. | Meng, Z.	Key Laboratory of Plant Molecular Physiology, Institute of Botany, Chinese Academy of Sciences, Beijing, 100093, China.	OsMADS14 and NF-YB1 cooperate in the direct activation of OsAGPL2 and Waxy during starch synthesis in rice endosperm	OsMADS14 and NF-YB1 cooperate in the direct activation of OsAGPL2 and Waxy during starch synthesis in rice endosperm	2022	*Endosperm/metabolism	Starch synthesis makes a dramatic contribution to the yield and nutritional value of cereal crops. Although several starch synthesis enzymes and related regulators have been reported, the underlying regulatory mechanisms of starch synthesis remain largely unknown. OsMADS14 is a FRUITFULL (FUL) -like MADS-box gene in rice (Oryza sativa) . Here we show that two null mutations of OsMADS14 result in …	two null mutations of OsMADS14 result in a shrunken and chalky grain phenotype . it is caused by obviously defective compound starch granules . loss-of-function leads to significantly downregulated expression of many core starch-synthesis genes, including OsAGPL2 .	New Phytol	234	1	77-92	1469-8137 (Electronic)	10.1111/nph.17990	https://www.ncbi.nlm.nih.gov/pubmed/35067957
Feng, X. | An, Y. | Zheng, J. | Sun, M. | Wang, L.	College of Horticulture, Nanjing Agricultural University Nanjing, China.	Proteomics and SSH Analyses of ALA-Promoted Fruit Coloration and Evidence for the Involvement of a MADS-Box Gene, MdMADS1	Proteomics and SSH Analyses of ALA-Promoted Fruit Coloration and Evidence for the Involvement of a MADS-Box Gene, MdMADS1	2016	5-aminolevulinic acid (ALA)	Skin color is a key quality attribute of fruits and how to improve fruit coloration has long been a major concern. 5-Aminolevulinic acid (ALA) , a natural plant growth regulator, can significantly increase anthocyanin accumulation in fruit skin and therefore effectively improve coloration of many fruits, including apple (Malus domesticus) . However, the molecular mechanism how ALA stimulates anth…	the molecular mechanism how ALA stimulates anthocyanin accumulation in fruit skin remains unknown . a total of 85 differentially expressed proteins in apple skins were up-regulated by ALA . function analysis suggested 87.06% of the ALA-responsive proteins were associated with fruit ripening .	Front Plant Sci	7		1615	1664-462X (Print)	10.3389/fpls.2016.01615	https://www.ncbi.nlm.nih.gov/pubmed/27872628
Feng, Y. Y. | Du, H. | Huang, K. Y. | Ran, J. H. | Wang, X. Q.	State Key Laboratory of Plant Diversity and Specialty Crops, Institute of Botany, Chinese Academy of Sciences, Beijing, 100093, China.	Reciprocal expression of MADS-box genes and DNA methylation reconfiguration initiate bisexual cones in spruce	Reciprocal expression of MADS-box genes and DNA methylation reconfiguration initiate bisexual cones in spruce	2024	Humans	The naturally occurring bisexual cone of gymnosperms has long been considered a possible intermediate stage in the origin of flowers, but the mechanisms governing bisexual cone formation remain largely elusive. Here, we employed transcriptomic and DNA methylomic analyses, together with hormone measurement, to investigate the molecular mechanisms underlying bisexual cone development in the conifer…	the naturally occurring bisexual cone of gymnosperms has long been considered a possible intermediate stage in the origin of flowers . but the mechanisms governing the formation of such cones remain largely elusive . our study reveals a ÒbisexualÓ expression profile in bisexual . cones .	Commun Biol	7	1	114	2399-3642 (Electronic)	10.1038/s42003-024-05786-6	https://www.ncbi.nlm.nih.gov/pubmed/38242964
Fernandez, D. E. | Wang, C. T. | Zheng, Y. | Adamczyk, B. J. | Singhal, R. | Hall, P. K. | Perry, S. E.	Department of Botany, University of Wisconsin, Madison, Wisconsin 53706 (D.E.F., C.-T.W., B.J.A., R.S., P.K.H.) ; andDepartment of Plant and Soil Sciences, University of Kentucky, Lexington, Kentucky 40546 (Y.Z., S.E.P.) dfernand@wisc.edu.	The MADS-Domain Factors AGAMOUS-LIKE15 and AGAMOUS-LIKE18, along with SHORT VEGETATIVE PHASE and AGAMOUS-LIKE24, Are Necessary to Block Floral Gene Expression during the Vegetative Phase	The MADS-Domain Factors AGAMOUS-LIKE15 and AGAMOUS-LIKE18, along with SHORT VEGETATIVE PHASE and AGAMOUS-LIKE24, Are Necessary to Block Floral Gene Expression during the Vegetative Phase	2014		Multiple factors, including the MADS-domain proteins AGAMOUS-LIKE15 (AGL15) and AGL18, contribute to the regulation of the transition from vegetative to reproductive growth. AGL15 and AGL18 were previously shown to act redundantly as floral repressors and upstream of FLOWERING LOCUS T (FT) in Arabidopsis (Arabidopsis thaliana) . A series of genetic and molecular experiments, primarily focused on …	multiple factors contribute to regulation of transition from vegetative to reproductive growth . AGL15 and AGL18 act redundantly as floral repressors in arabidopsis .	Plant Physiol	165	4	1591-1603	1532-2548 (Electronic)	10.1104/pp.114.242990	https://www.ncbi.nlm.nih.gov/pubmed/24948837
Fernandez-Pozo, N. | Metz, T. | Chandler, J. O. | Gramzow, L. | Merai, Z. | Maumus, F. | Mittelsten Scheid, O. | Theissen, G. | Schranz, M. E. | Leubner-Metzger, G. | Rensing, S. A.	Plant Cell Biology, Department of Biology, University of Marburg, Marburg, Germany.	Aethionema arabicum genome annotation using PacBio full-length transcripts provides a valuable resource for seed dormancy and Brassicaceae evolution research	Aethionema arabicum genome annotation using PacBio full-length transcripts provides a valuable resource for seed dormancy and Brassicaceae evolution research	2021	Brassicaceae/genetics/*metabolism/*physiology	Aethionema arabicum is an important model plant for Brassicaceae trait evolution, particularly of seed (development, regulation, germination, dormancy) and fruit (development, dehiscence mechanisms) characters. Its genome assembly was recently improved but the gene annotation was not updated. Here, we improved the Ae. arabicum gene annotation using 294 RNA-seq libraries and 136 307 full-length Pa…	genome assembly was recently improved but the gene annotation was not updated . analysis of orthologs showed a lower number of genes in Ae. arabicum than in other Brassicaceae .	Plant J	106	1	275-293	1365-313X (Electronic)	10.1111/tpj.15161	https://www.ncbi.nlm.nih.gov/pubmed/33453123
Ferrario, S. | Immink, R. G. | Shchennikova, A. | Busscher-Lange, J. | Angenent, G. C.	Business Unit Plant Development and Reproduction, Plant Research International, 6700 AA Wageningen, The Netherlands.	The MADS box gene FBP2 is required for SEPALLATA function in petunia	The MADS box gene FBP2 is required for SEPALLATA function in petunia	2003	Amino Acid Sequence	The ABC model, which was accepted for almost a decade as a paradigm for flower development in angiosperms, has been subjected recently to a significant modification with the introduction of the new class of E-function genes. This function is required for the proper action of the B- and C-class homeotic proteins and is provided in Arabidopsis by the SEPALLATA1/2/3 MADS box transcription factors. A…	a triple mutant in these partially redundant genes displays homeotic conversion of petals, stamens, and carpels . a similar phenotype was obtained by cosuppression of the MADS box geneFBP2in petunia .	Plant Cell	15	4	914-25	1040-4651 (Print)	10.1105/tpc.010280	https://www.ncbi.nlm.nih.gov/pubmed/12671087
Ferreira-Neto, J. R. C. | da Silva, M. D. | Rodrigues, F. A. | Nepomuceno, A. L. | Pandolfi, V. | de Lima Morais, D. A. | Kido, E. A. | Benko-Iseppon, A. M.	Laboratory of Molecular Genetics, Center of Biosciences, Genetics Department, Federal University of Pernambuco, Recife, Brazil.	Importance of inositols and their derivatives in cowpea under root dehydration: An omics perspective	Importance of inositols and their derivatives in cowpea under root dehydration: An omics perspective	2021	Dehydration	This work presents a robust analysis of the inositols (INSs) and raffinose family oligosaccharides (RFOs) pathways, using genomic and transcriptomic tools in cowpea under root dehydration. Nineteen (~70%) of the 26 scrutinized enzymes presented transcriptional up-regulation in at least one treatment time. The transcriptional orchestration allowed categorization of the analyzed enzymes as time-ind…	19 (70%) of the 26 scrutinized enzymes presented transcriptional up-regulation in at least one treatment time . genes of the INSs and RFOs pathways showed high orthology with analyzed Phaseoleae members .	Physiol Plant	172	2	441-462	1399-3054 (Electronic)	10.1111/ppl.13292	https://www.ncbi.nlm.nih.gov/pubmed/33247842
Figueiredo, D. D. | Batista, R. A. | Roszak, P. J. | Hennig, L. | Kohler, C.	Department of Plant Biology, Uppsala BioCenter, Swedish University of Agricultural Sciences and Linnean Center for Plant Biology, Uppsala, Sweden.	Auxin production in the endosperm drives seed coat development in Arabidopsis	Auxin production in the endosperm drives seed coat development in Arabidopsis	2016	Arabidopsis/genetics/growth & development/*metabolism	In flowering plants, seed development is initiated by the fusion of the maternal egg and central cells with two paternal sperm cells, leading to the formation of embryo and endosperm, respectively. The fertilization products are surrounded by the maternally derived seed coat, whose development prior to fertilization is blocked by epigenetic regulators belonging to the Polycomb Group (PcG) protein…	in flowering plants, seed development is initiated by the fusion of the maternal egg and central cells with two paternal sperm cells . the fertilization products are surrounded by the maternally derived seed coat . mutants for the MADS-box transcription factor AGL62 have an impaired transport of auxin from the endosperm to the integuments .	Elife	5			2050-084X (Electronic)	10.7554/eLife.20542	https://www.ncbi.nlm.nih.gov/pubmed/27848912
Figueiredo, D. D. | Batista, R. A. | Roszak, P. J. | Kohler, C.	Department of Plant Biology, Uppsala BioCenter, Swedish University of Agricultural Sciences and Linnean Center of Plant Biology, Uppsala, Sweden.	Auxin production couples endosperm development to fertilization	Auxin production couples endosperm development to fertilization	2015		In flowering plants, seed development is preceded by a double fertilization event, whereby two male sperm cells fuse with two female gametes: the egg and central cells. The fertilized egg cell will form the embryo, and the fertilized central cell will give rise to the triploid endosperm, whose function is to nourish and support the embryo. Even though the endosperm has an unparalleled role for hu…	in flowering plants, seed development is preceded by a double fertilization event . two male sperm cells fuse with two female gametes: the egg and central cells . increasing auxin levels after fertilization drive the replication of the central cell . endosperm is triggered by auxin production, derepressed by an epigenetic pathway .	Nat Plants	1		15184	2055-0278 (Electronic)	10.1038/nplants.2015.184	https://www.ncbi.nlm.nih.gov/pubmed/27251719
Fiume, E. | Coen, O. | Xu, W. | Lepiniec, L. | Magnani, E.	Institut Jean-Pierre Bourgin, INRA, AgroParisTech, CNRS, University of Paris-Saclay, Versailles, France.	Developmental patterning of sub-epidermal cells in the outer integument of Arabidopsis seeds	Developmental patterning of sub-epidermal cells in the outer integument of Arabidopsis seeds	2017	Arabidopsis/*embryology/metabolism	The seed, the reproductive unit of angiosperms, is generally protected by the seed coat. The seed coat is made of one or two integuments, each comprising two epidermal cells layers and, in some cases, extra sub-epidermal cell layers. The thickness of the seed-coat affects several aspects of seed biology such as dormancy, germination and mortality. In Arabidopsis, the inner integument displays one…	the seed coat is made of one or two integuments, each comprising two epidermal cells layers and, in some cases, extra sub-epidermal cell layers . the thickness of the seed-coat affects several aspects of seed biology such as dormancy and mortality .	PLoS One	12	11	e0188148	1932-6203 (Electronic)	10.1371/journal.pone.0188148	https://www.ncbi.nlm.nih.gov/pubmed/29141031
Flanagan, C. A. | Hu, Y. | Ma, H.	Cold Spring Harbor Laboratory, NY 11724-2212, USA.	Specific expression of the AGL1 MADS-box gene suggests regulatory functions in Arabidopsis gynoecium and ovule development	Specific expression of the AGL1 MADS-box gene suggests regulatory functions in Arabidopsis gynoecium and ovule development	1996	Arabidopsis/*genetics/*growth & development/metabolism	Several members of the MADS-box gene family have been shown to be important regulators of flower development, controlling such well-studied early events as the formation of the floral meristem and the specification of floral organ identity. Other floral-specific MADS-box genes, of as yet unknown function, have been isolated by homology and are proposed to be part of a regulatory hierarchy control…	several members of the MADS-box gene family have been shown to be important regulators of flower development . others have been isolated by homology and are proposed to be part of a regulatory hierarchy controlling flower development, such as the formation of the floral meristem . this paper presents a detailed analysis of the expression pattern of one such gene from Arabidopsis, AGL1 .	Plant J	10	2	343-53	0960-7412 (Print)	10.1046/j.1365-313x.1996.10020343.x	https://www.ncbi.nlm.nih.gov/pubmed/8771788
Flanagan, C. A. | Ma, H.	Cold Spring Harbor Laboratory, NY 11724-2212.	Spatially and temporally regulated expression of the MADS-box gene AGL2 in wild-type and mutant arabidopsis flowers	Spatially and temporally regulated expression of the MADS-box gene AGL2 in wild-type and mutant arabidopsis flowers	1994	Alleles	AGL2 is one of several Arabidopsis floral MADS-box genes that were isolated based on sequence similarity to the homeotic gene AGAMOUS. To investigate its possible role in flower development, we have characterized in detail the expression pattern of AGL2 in both wild-type and mutant flowers using RNA in situ hybridization. We find that AGL2 is floral-specific; it is not expressed in the infloresce…	AGL2 is one of several Arabidopsis floral MADS-box genes . it is floral-specific; it is not expressed in the inflorescence meristem . the transcript remains abundant in each organ during morphological differentiation . but diminishes as each organ undergoes the final maturation phase of development .	Plant Mol Biol	26	2	581-95	0167-4412 (Print)	10.1007/BF00013745	https://www.ncbi.nlm.nih.gov/pubmed/7948914
Fornara, F. | Marziani, G. | Mizzi, L. | Kater, M. | Colombo, L.		MADSâBox Genes Controlling Flower Development in Rice	MADSâBox Genes Controlling Flower Development in Rice	2008		The separation between monocot and dicot plants occurred about 120 - 180 million years ago and since then major morphological changes have led to the striking differences that can be observed today. To understand whether, despite these differences, the processes controlling flower development are fundamentally comparable in dicot and monocot species, it is necessary to perform comparative studies…	until recently flower development has been studied mainly in dicot plant species . genetic and molecular analyses led to the ABC model of flower development . most of the A, B, C, D and E genes identified so far have been shown to encode MADS-box transcription factors .	Plant Biology	5	1	16-22	1435-8603	10.1055/s-2003-37975	https://www.semanticscholar.org/paper/b38602383898926cbe839d406830f837c33a6336
Fornara, F. | Parenicova, L. | Falasca, G. | Pelucchi, N. | Masiero, S. | Ciannamea, S. | Lopez-Dee, Z. | Altamura, M. M. | Colombo, L. | Kater, M. M.	Dipartimento di Biologia, Universita degli Studi di Milano, 20133 Milan, Italy.	Functional characterization of OsMADS18, a member of the AP1/SQUA subfamily of MADS box genes	Functional characterization of OsMADS18, a member of the AP1/SQUA subfamily of MADS box genes	2004	Amino Acid Sequence	MADS box transcription factors controlling flower development have been isolated and studied in a wide variety of organisms. These studies have shown that homologous MADS box genes from different species often have similar functions. OsMADS18 from rice (Oryza sativa) belongs to the phylogenetically defined AP1/SQUA group. The MADS box genes of this group have functions in plant development, like …	overexpression ofOsMADS18in rice induced early flowering . phenotype closely resembling theap1mutant was not caused by down-regulation of AP1 expression . study shows that homologous MADS box genes from different species often have similar functions .	Plant Physiol	135	4	2207-19	0032-0889 (Print)	10.1104/pp.104.045039	https://www.ncbi.nlm.nih.gov/pubmed/15299121
Fu, S. | Yang, Y. | Wang, P. | Ying, Z. | Xu, W. | Zhou, Z.	Zhejiang Institute of Subtropical Crops, Zhejiang Academy of Agricultural Sciences, Wenzhou, China.	Comparative transcriptomic analysis of normal and abnormal in vitro flowers in Cymbidium nanulum Y. S. Wu et S. C. Chen identifies differentially expressed genes and candidate genes involved in flower formation	Comparative transcriptomic analysis of normal and abnormal in vitro flowers in Cymbidium nanulum Y. S. Wu et S. C. Chen identifies differentially expressed genes and candidate genes involved in flower formation	2022	Cymbidium nanulum Y. S. Wu et S. C. Chen	It is beneficial for breeding and boosting the flower value of ornamental plants such as orchids, which can take several years of growth before blooming. Over the past few years, in vitro flowering of Cymbidium nanulum Y. S. Wu et S. C. Chen has been successfully induced; nevertheless, the production of many abnormal flowers has considerably limited the efficiency of this technique. We carried ou…	thirty-six DEGs significantly enriched in plant hormone signal transduction . altered transcription factors (TFs) including 11 MADS-box genes may contribute to deformity . harpin-induced gene 1/nonrace-specific disease resistance gene 1 might play important roles in floral organ formation .	Front Plant Sci	13		1007913	1664-462X (Print)	10.3389/fpls.2022.1007913	https://www.ncbi.nlm.nih.gov/pubmed/36352857
Fuhrer, M. | Gaidora, A. | Venhuizen, P. | Dobrogojski, J. | Beziat, C. | Feraru, M. I. | Kleine-Vehn, J. | Kalyna, M. | Barbez, E.	Department of Applied Genetics and Cell Biology, University of Natural Resources and Life Sciences Vienna (BOKU) , Muthgasse 18, 1190 Vienna, Austria.	FRUITFULL Is a Repressor of Apical Hook Opening in Arabidopsis thaliana	FRUITFULL Is a Repressor of Apical Hook Opening in Arabidopsis thaliana	2020	Arabidopsis/genetics/*growth & development/metabolism	Plants adjust their architecture to a constantly changing environment, requiring adaptation of differential growth. Despite their importance, molecular switches, which define growth transitions, are largely unknown. Apical hook development in dark grown Arabidopsis thaliana (A. thaliana) seedlings serves as a suitable model for differential growth transition in plants. Here, we show that the phyt…	auxin counteracts light-induced growth transition during apical hook opening . genes inversely regulated by light and auxin are identified . MADS box transcription factor represses expression of growth stimulating genes .	Int J Mol Sci	21	17		1422-0067 (Electronic)	10.3390/ijms21176438	https://www.ncbi.nlm.nih.gov/pubmed/32899394
Fujisawa, M. | Nakano, T. | Shima, Y. | Ito, Y.	National Food Research Institute, National Agriculture and Food Research Organization, Tsukuba, Ibaraki 305-8642, Japan.	A large-scale identification of direct targets of the tomato MADS box transcription factor RIPENING INHIBITOR reveals the regulation of fruit ripening	A large-scale identification of direct targets of the tomato MADS box transcription factor RIPENING INHIBITOR reveals the regulation of fruit ripening	2013	Binding Sites	The fruit ripening developmental program is specific to plants bearing fleshy fruits and dramatically changes fruit characteristics, including color, aroma, and texture. The tomato (Solanum lycopersicum) MADS box transcription factor RIPENING INHIBITOR (RIN) , one of the earliest acting ripening regulators, is required for both ethylene-dependent and -independent ripening regulatory pathways. Rec…	the tomato (Solanum lycopersicum) MADS box transcription factor RIPENING INHIBITOR (RIN) is required for both ethylene-dependent and -independent ripening regulatory pathways . recent studies have identified two dozen direct RIN targets .	Plant Cell	25	2	371-86	1532-298X (Electronic)	10.1105/tpc.112.108118	https://www.ncbi.nlm.nih.gov/pubmed/23386264
Fujisawa, M. | Shima, Y. | Nakagawa, H. | Kitagawa, M. | Kimbara, J. | Nakano, T. | Kasumi, T. | Ito, Y.	National Food Research Institute, National Agriculture and Food Research Organization, Tsukuba, Ibaraki 305-8642, Japan.	Transcriptional regulation of fruit ripening by tomato FRUITFULL homologs and associated MADS box proteins	Transcriptional regulation of fruit ripening by tomato FRUITFULL homologs and associated MADS box proteins	2014	Binding Sites	The tomato (Solanum lycopersicum) MADS box FRUITFULL homologs FUL1 and FUL2 act as key ripening regulators and interact with the master regulator MADS box protein RIPENING INHIBITOR (RIN) . Here, we report the large-scale identification of direct targets of FUL1 and FUL2 by transcriptome analysis of FUL1/FUL2 suppressed fruits and chromatin immunoprecipitation coupled with microarray analysis (Ch…	the tomato (Solanum lycopersicum) MADS box FRUITFULL homologs FUL1 and FUL2 act as key ripening regulators . tetramer complexes of these proteins are mainly responsible for the regulation of ripeness .	Plant Cell	26	1	89-101	1532-298X (Electronic)	10.1105/tpc.113.119453	https://www.ncbi.nlm.nih.gov/pubmed/24415769
Fujiwara, S. | Oda, A. | Yoshida, R. | Niinuma, K. | Miyata, K. | Tomozoe, Y. | Tajima, T. | Nakagawa, M. | Hayashi, K. | Coupland, G. | Mizoguchi, T.	Institute of Biological Sciences, University of Tsukuba, Tsukuba, Ibaraki 305-8572, Japan.	Circadian clock proteins LHY and CCA1 regulate SVP protein accumulation to control flowering in Arabidopsis	Circadian clock proteins LHY and CCA1 regulate SVP protein accumulation to control flowering in Arabidopsis	2008	Arabidopsis/*genetics/physiology	The floral regulators GIGANTEA (GI) , CONSTANS (CO) , and FLOWERING LOCUS T (FT) play key roles in the photoperiodic flowering responses of the long-day plant Arabidopsis thaliana. The GI-CO-FT pathway is highly conserved in plants. Here, we demonstrate that the circadian clock proteins LATE ELONGATED HYPOCOTYL (LHY) and CIRCADIAN CLOCK-ASSOCIATED1 (CCA1) not only repressed the floral transition …	the floral regulators GIGANTEA (GI), CONSTANS (CO), and FLOWERING LOCUS T (FT) are highly conserved in plants . the circadian clock proteins LATE ELONGATED HYPOCOTYL (LHY) and CIRCADIAN CLOCK-ASSOCIATED1 (CCA1) accelerated flowering in LL .	Plant Cell	20	11	2960-71	1040-4651 (Print)	10.1105/tpc.108.061531	https://www.ncbi.nlm.nih.gov/pubmed/19011118
Gabay, G. | Faigenboim, A. | Dahan, Y. | Izhaki, Y. | Itkin, M. | Malitsky, S. | Elkind, Y. | Flaishman, M. A.	Institute of Plant Sciences, Volcani Research Center, Derech Hamacabim, Rishon Lezion, Israel.	Transcriptome analysis and metabolic profiling reveal the key role of alpha-linolenic acid in dormancy regulation of European pear	Transcriptome analysis and metabolic profiling reveal the key role of alpha-linolenic acid in dormancy regulation of European pear	2019	Cold Temperature	Deciduous trees require sufficient chilling during winter dormancy to grow. To decipher the dormancy-regulating mechanism, we carried out RNA sequencing (RNA-Seq) analysis and metabolic profiling of European pear (Pyrus communis L.) vegetative buds during the dormancy phases. Samples were collected from two cultivars that differed greatly in their chilling requirements: 'Spadona' (SPD) , a low ch…	european pear (Pyrus communisL.) requires sufficient chilling during winter dormancy to grow . RNA-seq analysis and metabolic profiling of vegetative buds during the dormant phases .	J Exp Bot	70	3	1017-1031	1460-2431 (Electronic)	10.1093/jxb/ery405	https://www.ncbi.nlm.nih.gov/pubmed/30590791
Gambhir, P. | Raghuvanshi, U. | Parida, A. P. | Kujur, S. | Sharma, S. | Sopory, S. K. | Kumar, R. | Sharma, A. K.	Department of Plant Molecular Biology, University of Delhi South Campus, New Delhi 110021, India.	Elevated methylglyoxal levels inhibit tomato fruit ripening by preventing ethylene biosynthesis	Elevated methylglyoxal levels inhibit tomato fruit ripening by preventing ethylene biosynthesis	2023	*Solanum lycopersicum/genetics	Methylglyoxal (MG) , a toxic compound produced as a by-product of several cellular processes, such as respiration and photosynthesis, is well known for its deleterious effects, mainly through glycation of proteins during plant stress responses. However, very little is known about its impact on fruit ripening. Here, we found that MG levels are maintained at high levels in green tomato (Solanum lyc…	MG levels are maintained at high levels in green tomato (Solanum lycopersicumL.) fruits . despite a respiratory burst during this transition, this decline is mainly mediated through a glutathione-dependent MG detoxification pathway .	Plant Physiol	192	3	2161-2184	1532-2548 (Electronic)	10.1093/plphys/kiad142	https://www.ncbi.nlm.nih.gov/pubmed/36879389
Gan, Y. | Bernreiter, A. | Filleur, S. | Abram, B. | Forde, B. G.	Centre for Sustainable Agriculture, Lancaster Environment Centre, Lancaster University, Lancaster LA1 4YQ, UK.	Overexpressing the ANR1 MADS-box gene in transgenic plants provides new insights into its role in the nitrate regulation of root development	Overexpressing the ANR1 MADS-box gene in transgenic plants provides new insights into its role in the nitrate regulation of root development	2012	Arabidopsis/genetics/growth & development/*metabolism	The expression of the ANR1 MADS-box gene was manipulated in transgenic plants to investigate its role in the NO (3) (-) -dependent regulation of root development in Arabidopsis thaliana. Constitutive overexpression of ANR1 in roots, achieved using GAL4 enhancer trap lines, resulted in more rapid early seedling development, increased lengths and numbers of lateral roots and increased shoot fresh w…	the expression of the ANR1 MADS-box gene was manipulated in transgenic plants to investigate its role in the NO3-dependent regulation of root development inArabidopsis thaliana . Constitutive overexpression of the gene in roots resulted in more rapid early seedling development, increased lengths and numbers of lateral roots .	Plant Cell Physiol	53	6	1003-16	1471-9053 (Electronic)	10.1093/pcp/pcs050	https://www.ncbi.nlm.nih.gov/pubmed/22523192
Gan, Y. | Filleur, S. | Rahman, A. | Gotensparre, S. | Forde, B. G.	Centre for Novel Agricultural Products, University of York, Heslington, York, Y010 5DD, UK.	Nutritional regulation of ANR1 and other root-expressed MADS-box genes in Arabidopsis thaliana	Nutritional regulation of ANR1 and other root-expressed MADS-box genes in Arabidopsis thaliana	2005	Anion Transport Proteins/metabolism	The ANR1 MADS-box gene in Arabidopsis thaliana (L.) Heynh. has previously been identified as a key regulator of lateral root growth in response to signals from external nitrate (NO3 (-) ) . We have used quantitative real-time PCR to investigate the responsiveness of ANR1 and 11 other root-expressed MADS-box genes to fluctuations in the supply of N, P and S. ANR1 expression in roots of hydroponica…	the ANR1 MADS-box gene has previously been identified as a key regulator of lateral root growth in response to signals from external nitrate (NO 3 ) we have used quantitative real-time PCR to investigate the responsiveness of ANR1, and 11 other root-expressed MADS box genes to fluctuations in the supply of N .	Planta	222	4	730-42	0032-0935 (Print)	10.1007/s00425-005-0020-3	https://www.ncbi.nlm.nih.gov/pubmed/16021502
Gan, Yinbo | Zhou, Zhongjing | An, Lijun | Bao, Shengjie | Liu, Qing | Srinivasan, Murali | Goddard, Peter		The effects of fluctuations in the nutrient supply on the expression of ANR1 and 11 other MADS box genes in shoots and roots of Arabidopsis thaliana	The effects of fluctuations in the nutrient supply on the expression of ANR1 and 11 other MADS box genes in shoots and roots of Arabidopsis thaliana	2010		We previously reported that the response of ANR1 expression in shoots to nitrogen (N) starvation and resupply was different from its response in roots. However, how the other root-expressed MADS box genes respond to different N fluctuations in the shoot, and how these MADS box genes respond to complete nutrient fluctuations in the root, were unknown. Results from this study have shown that some m…	how the other root-expressed MADS box genes respond to different N fluctuations in the shoot and root, were unknown . Among these 12 roots, AGL16 was the only gene to show a similar response to N fluctuation in both shoots and roots in the same way as ANR1 .	Botany	88	12	1023-1031	1916-2790	10.1139/b10-075	https://www.semanticscholar.org/paper/e3b944abe87e30db56d7704343d92d005f5b3315
Gao, M. | Jiang, W. | Lin, Z. | Lin, Q. | Ye, Q. | Wang, W. | Xie, Q. | He, X. | Luo, C. | Chen, Q.	College of Horticulture, Fujian Agriculture and Forestry University, Fuzhou 350002, China.	SMRT and Illumina RNA-Seq Identifies Potential Candidate Genes Related to the Double Flower Phenotype and Unveils SsAP2 as a Key Regulator of the Double-Flower Trait in Sagittaria sagittifolia	SMRT and Illumina RNA-Seq Identifies Potential Candidate Genes Related to the Double Flower Phenotype and Unveils SsAP2 as a Key Regulator of the Double-Flower Trait in Sagittaria sagittifolia	2022	Flowers/*genetics	Double flowers are one of the important objectives of ornamental plant breeding. Sagittaria sagittifolia is an aquatic herb in the Alismataceae family that is widely used as an ornamental plant in gardens. However, the reference genome has not been published, and the molecular regulatory mechanism of flower formation remains unclear. In this study, single molecule real-time (SMRT) sequencing tech…	the reference genome has not been published . the molecular regulatory mechanism of flower formation remains unclear . this study is the first report of a full-length transcriptome of S. sagittifolia .	Int J Mol Sci	23	4		1422-0067 (Electronic)	10.3390/ijms23042240	https://www.ncbi.nlm.nih.gov/pubmed/35216356
Gao, R. | Wang, Y. | Gruber, M. Y. | Hannoufa, A.	London Research and Development Center, Agriculture and Agri-Food Canada, London, ON, Canada.	miR156/SPL10 Modulates Lateral Root Development, Branching and Leaf Morphology in Arabidopsis by Silencing AGAMOUS-LIKE 79	miR156/SPL10 Modulates Lateral Root Development, Branching and Leaf Morphology in Arabidopsis by Silencing AGAMOUS-LIKE 79	2017	Agl79	The developmental functions of miR156-SPL regulatory network have been extensively studied in Arabidopsis, but the downstream genes regulated by each SPL have not been well characterized. In this study, Next Generation Sequencing-based transcriptome analysis was performed on roots of wild type (WT) and miR156 overexpression (miR156OE) plants. One of the SPL genes, SPL10, which represses lateral r…	the downstream genes regulated by each SPL have not been well characterized . in this study, a transcriptome analysis was performed on roots of wild type and miR156 overexpression (miR156OE) plants . one gene, italic>SPL10/italic >, was significantly downregulated .	Front Plant Sci	8		2226	1664-462X (Print)	10.3389/fpls.2017.02226	https://www.ncbi.nlm.nih.gov/pubmed/29354153
Gao, S. | Zeng, X. | Wang, J. | Xu, Y. | Yu, C. | Huang, Y. | Wang, F. | Wu, K. | Yang, S.	Key Laboratory of Green Processing and Intelligent Manufacturing of Lingnan Specialty Food, College of Light Industry and Food Science, Zhongkai University of Agriculture and Engineering, Ministry of Agriculture, Guangzhou 510225, China.	Arabidopsis SUMO E3 Ligase SIZ1 Interacts with HDA6 and Negatively Regulates HDA6 Function during Flowering	Arabidopsis SUMO E3 Ligase SIZ1 Interacts with HDA6 and Negatively Regulates HDA6 Function during Flowering	2021	Arabidopsis/genetics/*physiology	The changes in histone acetylation mediated by histone deacetylases (HDAC) play a crucial role in plant development and response to environmental changes. Mammalian HDACs are regulated by post-translational modifications (PTM) , such as phosphorylation, acetylation, ubiquitination and small ubiquitin-like modifier (SUMO) modification (SUMOylation) , which affect enzymatic activity and transcripti…	mammalian histone deacetylases (HDACs) are regulated by post-translational modifications . if PTMs of plant HDACs alter their functions are largely unknown . biochemical analyses indicated that HDA6 is not modified by SUMO1 .	Cells	10	11		2073-4409 (Electronic)	10.3390/cells10113001	https://www.ncbi.nlm.nih.gov/pubmed/34831226
Garcia-Cruz, K. V. | Garcia-Ponce, B. | Garay-Arroyo, A. | Sanchez, M. P. | Ugartechea-Chirino, Y. | Desvoyes, B. | Pacheco-Escobedo, M. A. | Tapia-Lopez, R. | Ransom-Rodriguez, I. | Gutierrez, C. | Alvarez-Buylla, E. R.	Laboratorio de Genetica Molecular, Epigenetica, Desarrollo y Evolucion de Plantas, Instituto de Ecologia, Universidad Nacional Autonoma de Mexico, Ciudad Universitaria, Av. Universidad 3000, Coyoacan, Mexico D.F. 04510, Mexico.	The MADS-box XAANTAL1 increases proliferation at the Arabidopsis root stem-cell niche and participates in transition to differentiation by regulating cell-cycle components	The MADS-box XAANTAL1 increases proliferation at the Arabidopsis root stem-cell niche and participates in transition to differentiation by regulating cell-cycle components	2016	Arabidopsis thaliana	Background Morphogenesis depends on the concerted modulation of cell proliferation and differentiation. Such modulation is dynamically adjusted in response to various external and internal signals via complex transcriptional regulatory networks that mediate between such signals and regulation of cell-cycle and cellular responses (proliferation, growth, differentiation) . In plants, which are sess…	in plants, the proliferation/differentiation balance is plastically adjusted during their life cycle . the MADS-box genes are key developmental regulators in eukaryotes .	Ann Bot	118	4	787-796	1095-8290 (Electronic)	10.1093/aob/mcw126	https://www.ncbi.nlm.nih.gov/pubmed/27474508
Garcia-Gomez, B. E. | Salazar, J. A. | Egea, J. A. | Rubio, M. | Martinez-Gomez, P. | Ruiz, D.	Department of Plant Breeding, Centro de Edafologia y Biologia Aplicada del Segura-Consejo Superior de Investigaciones Cientificas (CEBAS-CSIC) , 30100 Espinardo, Spain.	Monitoring Apricot (Prunus armeniaca L.) Ripening Progression through Candidate Gene Expression Analysis	Monitoring Apricot (Prunus armeniaca L.) Ripening Progression through Candidate Gene Expression Analysis	2022	Anthocyanins/genetics/metabolism	This study aimed at the monitoring of the apricot (Prunus armeniaca L.) ripening progression through the expression analysis of 25 genes related to fruit quality traits in nine cultivars with great differences in fruit color and ripening date. The level of pigment compounds, such as anthocyanins and carotenoids, is a key factor in food taste, and is responsible for the reddish blush color or oran…	the level of pigment compounds is a key factor in food taste . anthocyanins and carotenoids are responsible for the reddish blush color . candidate genes are key during biosynthetic pathways or gene expression regulation .	Int J Mol Sci	23	9		1422-0067 (Electronic)	10.3390/ijms23094575	https://www.ncbi.nlm.nih.gov/pubmed/35562966
Garcia-Maroto, F. | Ortega, N. | Lozano, R. | Carmona, M. J.	Departamento de Biotecnologia, E.T.S. Ingenieros Agronomos, U.P.M., Madrid, Spain.	Characterization of the potato MADS-box gene STMADS16 and expression analysis in tobacco (Nicotiana tabacum) transgenic plants	Characterization of the potato MADS-box gene STMADS16 and expression analysis in tobacco (Nicotiana tabacum) transgenic plants	2000	Amino Acid Sequence	A new MADS-box gene, STMADS16, has been cloned in Solanum tuberosum L. that is expressed in all vegetative tissues of the plant, mainly in the stem, but not in flower organs. STMADS16 expression is established early during vegetative development and is not regulated by light. Sequence similarity besides the spatial and temporal expression patterns allow to define a novel MADS-box subfamily compri…	a new MADS-box gene, STMADS16, has been cloned in Solanum tuberosum L. that is expressed in all vegetative tissues of the plant, mainly in the stem, but not in flower organs .	Plant Mol Biol	42	3	499-513	0167-4412 (Print)	10.1023/a:1006397427894	https://www.ncbi.nlm.nih.gov/pubmed/10798619
Ge, H. | Shi, Y. N. | Zhang, M. X. | Li, X. | Yin, X. R. | Chen, K. S.	Zhejiang Provincial Key Laboratory of Biometrology and Inspection & Quarantine, College of Life Sciences, China Jiliang University, Hangzhou, China.	The MADS-Box Transcription Factor EjAGL65 Controls Loquat Flesh Lignification via Direct Transcriptional Inhibition of EjMYB8	The MADS-Box Transcription Factor EjAGL65 Controls Loquat Flesh Lignification via Direct Transcriptional Inhibition of EjMYB8	2021	Mads	Loquat fruit accumulates lignin in its flesh when undergoing chilling injury during postharvest storage, making it a suitable model for the study of flesh lignification. Transcriptional regulation of lignin biosynthesis is principally controlled by the NAC-MYB transcriptional cascade in model plants. Previous research has demonstrated that EjMYB8 activates lignin biosynthesis through direct inter…	p>Loquat fruit accumulates lignin in its flesh when undergoing chilling injury during postharvest storage . transcription is principally controlled by the NAC-MYB transcriptional cascade in model plants .	Front Plant Sci	12		652959	1664-462X (Print)	10.3389/fpls.2021.652959	https://www.ncbi.nlm.nih.gov/pubmed/33897744
Ge, H. | Xu, H. | Li, X. | Chen, J.	Institute of Horticulture, Zhejiang Academy of Agricultural Sciences, Hangzhou, Zhejiang, China.	The MADS-box gene EjAGL15 positively regulates lignin deposition in the flesh of loquat fruit during its storage	The MADS-box gene EjAGL15 positively regulates lignin deposition in the flesh of loquat fruit during its storage	2023	MADS-box	INTRODUCTION: Lignification of fruit flesh is a common physiological disorder that occurs during post-harvest storage, resulting in the deterioration of fruit quality. Lignin deposition in loquat fruit flesh occurs due to chilling injury or senescence, at temperatures around 0 degrees C or 20 degrees C, respectively. Despite extensive research on the molecular mechanisms underlying chilling-induc…	lignin deposition in loquat fruit flesh occurs due to chilling injury or senescence . it is still unclear whether MADS-box genes can regulate the ligin . a gene that correlated positively with the variation in lignin content was identified . findings suggest that EjAGL15 functions as a positive regulator .	Front Plant Sci	14		1166262	1664-462X (Print)	10.3389/fpls.2023.1166262	https://www.ncbi.nlm.nih.gov/pubmed/37235008
Ghosh Dasgupta, M. | Dev, S. A. | Muneera Parveen, A. B. | Sarath, P. | Sreekumar, V. B.	Institute of Forest Genetics and Tree Breeding, Forest Campus, R.S. Puram, Coimbatore Pincode-641002, India.	Draft genome of Korthalsia laciniosa (Griff.) Mart., a climbing rattan elucidates its phylogenetic position	Draft genome of Korthalsia laciniosa (Griff.) Mart., a climbing rattan elucidates its phylogenetic position	2021	Gene Expression Profiling	Korthalsia laciniosa (Griff.) Mart. is a climbing rattan used as a source of durable and flexible cane. In the present study, the draft genome of K. laciniosa was sequenced, de novo assembled and annotated. Genome-wide identification of MADS-Box transcription factors revealed loss of Mbeta, and Mgamma genes belonging to Type I subclass in the rattan lineage. Mining of the genome revealed presence…	draft genome of Korthalsia laciniosa was assembled and annotated . phylogenetic analysis revealed relatedness of genus to Eugeissona . loss of M, and M belonging to Type I MADS-Box genes documented .	Genomics	113	4	2010-2022	1089-8646 (Electronic)	10.1016/j.ygeno.2021.04.023	https://www.ncbi.nlm.nih.gov/pubmed/33862180
Gimenez, E. | Dominguez, E. | Pineda, B. | Heredia, A. | Moreno, V. | Lozano, R. | Angosto, T.	Centro de Investigacion en Biotecnologia Agroalimentaria, Universidad de Almeria, 04120 Almeria, Spain (E.G., R.L., T.A.) ;Instituto de Hortofruticultura Subtropical y Mediterranea La Mayora, Universidad de Malaga-Consejo Superior de Investigaciones Cientificas, 29750 Algarrobo-Costa, Malaga, Spain (E.D., A.H.) ; andInstituto de Biologia Molecular y Celular de Plantas, Universidad Politecnica de …	Transcriptional Activity of the MADS Box ARLEQUIN/TOMATO AGAMOUS-LIKE1 Gene Is Required for Cuticle Development of Tomato Fruit	Transcriptional Activity of the MADS Box ARLEQUIN/TOMATO AGAMOUS-LIKE1 Gene Is Required for Cuticle Development of Tomato Fruit	2015	Biomechanical Phenomena	Fruit development and ripening entail key biological and agronomic events, which ensure the appropriate formation and dispersal of seeds and determine productivity and yield quality traits. The MADS box gene Arlequin/tomato Agamous-like1 (hereafter referred to as TAGL1) was reported as a key regulator of tomato (Solanum lycopersicum) reproductive development, mainly involved in flower development…	fruit development and ripening entail key biological and agronomic events . silencing of theTAGL1gene promotes significant changes affecting cuticle development . overexpression ofTAGL 1significantly increased the amount of cuticles .	Plant Physiol	168	3	1036-48	1532-2548 (Electronic)	10.1104/pp.15.00469	https://www.ncbi.nlm.nih.gov/pubmed/26019301
Goeckeritz, C. Z. | Rhoades, K. E. | Childs, K. L. | Iezzoni, A. F. | VanBuren, R. | Hollender, C. A.	Department of Horticulture, Michigan State University, 1066 Bogue St, East Lansing, MI 48824, USA.	Genome of tetraploid sour cherry (Prunus cerasus L.) 'Montmorency' identifies three distinct ancestral Prunus genomes	Genome of tetraploid sour cherry (Prunus cerasus L.) 'Montmorency' identifies three distinct ancestral Prunus genomes	2023		Sour cherry (Prunus cerasus L.) is a valuable fruit crop in the Rosaceae family and a hybrid between progenitors closely related to extant Prunus fruticosa (ground cherry) and Prunus avium (sweet cherry) . Here we report a chromosome-scale genome assembly for sour cherry cultivar Montmorency, the predominant cultivar grown in the USA. We also generated a draft assembly of P. fruticosa to use alon…	sour cherry (Prunus cerasusL.) is a valuable fruit crop in the Rosaceae family . it's a hybrid between progenitors closely related to extantPrunuse fruticosa(ground cherry) andPranus avium(sweet cherry) . 'Montmorency' is trigenomic, containing two distinct subgenomes inherited from aP	Hortic Res	10	7	uhad097	2662-6810 (Print)	10.1093/hr/uhad097	https://www.ncbi.nlm.nih.gov/pubmed/37426879
Gomez-Felipe, A. | Kierzkowski, D. | de Folter, S.	Unidad de Genomica Avanzada (UGA-Langebio) , Centro de Investigacion y de Estudios Avanzados del Instituto Politecnico Nacional (CINVESTAV-IPN) , Irapuato CP 36824, Guanajuato, Mexico.	The Relationship between AGAMOUS and Cytokinin Signaling in the Establishment of Carpeloid Features	The Relationship between AGAMOUS and Cytokinin Signaling in the Establishment of Carpeloid Features	2021	Agamous	Gynoecium development is dependent on gene regulation and hormonal pathway interactions. The phytohormones auxin and cytokinin are involved in many developmental programs, where cytokinin is normally important for cell division and meristem activity, while auxin induces cell differentiation and organ initiation in the shoot. The MADS-box transcription factor AGAMOUS (AG) is important for the deve…	cytokinin is normally important for cell division and meristem activity . auxin induces cell differentiation and organ initiation in the shoot . the MADS-box transcription factor AGAMOUS (AG) is important for reproductive structures .	Plants (Basel)	10	5		2223-7747 (Print)	10.3390/plants10050827	https://www.ncbi.nlm.nih.gov/pubmed/33919177
Gomez-Soto, D. | Ramos-Sanchez, J. M. | Alique, D. | Conde, D. | Triozzi, P. M. | Perales, M. | Allona, I.	Centro de Biotecnologia y Genomica de Plantas, Instituto de Investigacion y Tecnologia Agraria y Alimentaria, Universidad Politecnica de Madrid, Madrid, Spain.	Overexpression of a SOC1-Related Gene Promotes Bud Break in Ecodormant Poplars	Overexpression of a SOC1-Related Gene Promotes Bud Break in Ecodormant Poplars	2021	MADS-box family transcription factors	Perennial species in the boreal and temperate regions are subject to extreme annual variations in light and temperature. They precisely adapt to seasonal changes by synchronizing cycles of growth and dormancy with external cues. Annual dormancy-growth transitions and flowering involve factors that integrate environmental and endogenous signals. MADS-box transcription factors have been extensively…	annual dormancyÐgrowth transitions and flowering involve factors that integrate environmental and endogenous signals . hybrid poplars overexpressing the gene show no differences in growth cessation and bud set . overexpression of the gene downregulates the gibberellin catabolism gene .	Front Plant Sci	12		670497	1664-462X (Print)	10.3389/fpls.2021.670497	https://www.ncbi.nlm.nih.gov/pubmed/34113369
Gong, P. | Song, C. | Liu, H. | Li, P. | Zhang, M. | Zhang, J. | Zhang, S. | He, C.	State Key Laboratory of Systematic and Evolutionary Botany, Institute of Botany, Chinese Academy of Sciences, Nanxincun 20, Xiangshan, Beijing, China.	Physalis floridana CRABS CLAW mediates neofunctionalization of GLOBOSA genes in carpel development	Physalis floridana CRABS CLAW mediates neofunctionalization of GLOBOSA genes in carpel development	2021	Flowers/genetics/metabolism	Floral B-function MADS-box genes, such as GLOBOSA (GLO) , function in corolla and stamen organ identity specification. The functions of these genes outside these floral whorls are rarely reported. DOLL1 is a GLO gene controlling corolla and androecium organ identity. In this study we found that, in Physalis floridana double-layered-lantern 1 (doll1) mutant pollinated with wild-type pollen, fruit …	Physalis floridana double-layered-lantern 1(doll1) mutant pollinated with wild-type pollen, fruit set was extremely low . repressed indol1native carpels . loss-of-function of PFCR .	J Exp Bot	72	20	6882-6903	1460-2431 (Electronic)	10.1093/jxb/erab309	https://www.ncbi.nlm.nih.gov/pubmed/34181715
Gramzow, L. | Sharma, R. | Theissen, G.	Matthias Schleiden Institute/Genetics, Friedrich Schiller University Jena, 07743 Jena, Germany.	Evolutionary Dynamics of FLC-like MADS-Box Genes in Brassicaceae	Evolutionary Dynamics of FLC-like MADS-Box Genes in Brassicaceae	2023	MADS-box gene	MADS-box genes encode transcription factors that play important roles in the development and evolution of plants. There are more than a dozen clades of MADS-box genes in angiosperms, of which those with functions in the specification of floral organ identity are especially well-known. From what has been elucidated in the model plant Arabidopsis thaliana, the clade of FLC-like MADS-box genes, comp…	there are more than a dozen clades of MADS-box genes in angiosperms . FLC-like genes generate clusters of tandemly duplicated genes . phylogenetic analysis shows that there are three major clade of FLC like genes in Brassicaceae .	Plants (Basel)	12	18		2223-7747 (Print)	10.3390/plants12183281	https://www.ncbi.nlm.nih.gov/pubmed/37765445
Gramzow, L. | Theissen, G.	Department of Genetics, Friedrich Schiller University Jena, Philosophenweg 12, 07743 Jena, Germany. lydia.gramzow@uni-jena.de.	Phylogenomics of MADS-Box Genes in Plants - Two Opposing Life Styles in One Gene Family	Phylogenomics of MADS-Box Genes in Plants - Two Opposing Life Styles in One Gene Family	2013		The development of multicellular eukaryotes, according to their body plan, is often directed by members of multigene families that encode transcription factors. MADS (for MINICHROMOSOME MAINTENANCE1, AGAMOUS, DEFICIENS and SERUM RESPONSE FACTOR) -box genes form one of those families controlling nearly all major aspects of plant development. Knowing the complete complement of MADS-box genes in seq…	the complete set of MADS-box genes is identified in 17 plant genomes . this will allow a better understanding of the evolutionary patterns of these genes . more than 2,600 genes from 24 species were classified into the two types of genes, Type I and Type II .	Biology (Basel)	2	3	1150-64	2079-7737 (Print)	10.3390/biology2031150	https://www.ncbi.nlm.nih.gov/pubmed/24833059
Gramzow, L. | Theissen, G.	Department of Genetics, Friedrich Schiller University, Jena, Germany.	Phylogenomics reveals surprising sets of essential and dispensable clades of MIKC (c) -group MADS-box genes in flowering plants	Phylogenomics reveals surprising sets of essential and dispensable clades of MIKC (c) -group MADS-box genes in flowering plants	2015	*Evolution, Molecular	MIKC (C) -group MADS-box genes are involved in the control of many developmental processes in flowering plants. All of these genes are members of one of 17 clades that had already been established in the most recent common ancestor (MRCA) of extant angiosperms. These clades trace back to 11 seed plant-specific superclades that were present in the MRCA of extant seed plants. Due to their important…	MIKC C -group MADS-box genes are involved in the control of many developmental processes in flowering plants . all of these genes are members of one of 17 clades that had already been established in the most recent common ancestor (MRCA) of extant angiosperms .	J Exp Zool B Mol Dev Evol	324	4	353-62	1552-5015 (Electronic)	10.1002/jez.b.22598	https://www.ncbi.nlm.nih.gov/pubmed/25678468
Gramzow, L. | Weilandt, L. | Theissen, G.	Department of Genetics, Friedrich Schiller University Jena, Philosophenweg 12, 07743 Jena, Germany.	MADS goes genomic in conifers: towards determining the ancestral set of MADS-box genes in seed plants	MADS goes genomic in conifers: towards determining the ancestral set of MADS-box genes in seed plants	2014	Amino Acid Sequence	BACKGROUND AND AIMS: MADS-box genes comprise a gene family coding for transcription factors. This gene family expanded greatly during land plant evolution such that the number of MADS-box genes ranges from one or two in green algae to around 100 in angiosperms. Given the crucial functions of MADS-box genes for nearly all aspects of plant development, the expansion of this gene family probably con…	the number of MADS-box genes ranges from one or two in green algae to around 100 in angiosperms . the expansion of these genes during one important step of land plant evolution, namely the origin of seed plants, remains poorly understood .	Ann Bot	114	7	1407-29	1095-8290 (Electronic)	10.1093/aob/mcu066	https://www.ncbi.nlm.nih.gov/pubmed/24854168
Grandi, V. | Gregis, V. | Kater, M. M.	Department of Biomolecular Sciences and Biotechnology, Universita degli Studi di Milano, Via Celoria 26, Milan, Italy.	Uncovering genetic and molecular interactions among floral meristem identity genes in Arabidopsis thaliana	Uncovering genetic and molecular interactions among floral meristem identity genes in Arabidopsis thaliana	2012	Arabidopsis/*genetics/growth & development	The inflorescence meristem produces floral primordia that remain undifferentiated during the first stages of flower development. Genes controlling floral meristem identity include LEAFY (LFY) , APETALA1 (AP1) , CAULIFLOWER (CAL) , LATE MERISTEM IDENTITY 1 (LMI1) , SHORT VEGETATIVE PHASE (SVP) and AGAMOUS-LIKE24 (AGL24) . The lfy mutant shows partial reversions of flowers into inflorescence shoot-…	genes controlling floral meristem identity include LEAFY ( LFY ), APETALA1 ( AP1), CAULIFLOWER ( CAL ), LATE MERISTEM IDENTITY 1 ( LMI1), SHORT VEGETATIVE PHASE ( SVP) and AGAMOUS-LIKE24 ( AGL24 ).	Plant J	69	5	881-93	1365-313X (Electronic)	10.1111/j.1365-313X.2011.04840.x	https://www.ncbi.nlm.nih.gov/pubmed/22040363
Greenup, A. G. | Sasani, S. | Oliver, S. N. | Talbot, M. J. | Dennis, E. S. | Hemming, M. N. | Trevaskis, B.	Research School of Biology, Australian National University, Canberra, Australian Capital Territory 0200, Australia.	ODDSOC2 is a MADS box floral repressor that is down-regulated by vernalization in temperate cereals	ODDSOC2 is a MADS box floral repressor that is down-regulated by vernalization in temperate cereals	2010	Arabidopsis Proteins/chemistry	In temperate cereals, such as wheat (Triticum aestivum) and barley (Hordeum vulgare) , the transition to reproductive development can be accelerated by prolonged exposure to cold (vernalization) . We examined the role of the grass-specific MADS box gene ODDSOC2 (OS2) in the vernalization response in cereals. The barley OS2 gene (HvOS2) is expressed in leaves and shoot apices but is repressed by v…	barleyOS2gene (HvOS2) is expressed in leaves and shoot apices but is repressed . vernalization repressesOS2independently ofVERNALIZATION1(VRN1) in einkorn wheat .	Plant Physiol	153	3	1062-73	1532-2548 (Electronic)	10.1104/pp.109.152488	https://www.ncbi.nlm.nih.gov/pubmed/20431086
Gregis, V. | Andres, F. | Sessa, A. | Guerra, R. F. | Simonini, S. | Mateos, J. L. | Torti, S. | Zambelli, F. | Prazzoli, G. M. | Bjerkan, K. N. | Grini, P. E. | Pavesi, G. | Colombo, L. | Coupland, G. | Kater, M. M.		Identification of pathways directly regulated by SHORT VEGETATIVE PHASE during vegetative and reproductive development in Arabidopsis	Identification of pathways directly regulated by SHORT VEGETATIVE PHASE during vegetative and reproductive development in Arabidopsis	2013	Arabidopsis/*genetics/growth & development/metabolism	BACKGROUND: MADS-domain transcription factors play important roles during plant development. The Arabidopsis MADS-box gene SHORT VEGETATIVE PHASE (SVP) is a key regulator of two developmental phases. It functions as a repressor of the floral transition during the vegetative phase and later it contributes to the specification of floral meristems. How these distinct activities are conferred by a si…	the arabidopsis MADS-box gene SHORT VEGETATIVE PHASE (SVP) is a key regulator of two developmental phases . how distinct activities are conferred by a single transcription factor is unclear . interactions with other MADS domain proteins which specify binding to different genomic regions is likely one mechanism .	Genome Biol	14	6	R56	1474-760X (Electronic)	10.1186/gb-2013-14-6-r56	https://www.ncbi.nlm.nih.gov/pubmed/23759218
Grimplet, J. | Martinez-Zapater, J. M. | Carmona, M. J.	Instituto de Ciencias de la Vid y del Vino (CSIC, Universidad de La Rioja, Gobierno de La Rioja) , Logrono, 26007, Spain. jerome.grimplet@icvv.es.	Structural and functional annotation of the MADS-box transcription factor family in grapevine	Structural and functional annotation of the MADS-box transcription factor family in grapevine	2016	Gene Expression Regulation, Plant/genetics	BACKGROUND: MADS-box genes encode transcription factors that are involved in developmental control and signal transduction in eukaryotes. In plants, they are associated to numerous development processes most notably those related to reproductive development: flowering induction, specification of inflorescence and flower meristems, establishment of flower organ identity, as well as regulation of f…	a genome-wide analysis of the complete set of MADS-box genes in grapevine . ten new MIKCC genes were identified, including a potential new group of short proteins . genes that can be crucial for development of central cell, endosperm and embryos are conserved .	BMC Genomics	17		80	1471-2164 (Electronic)	10.1186/s12864-016-2398-7	https://www.ncbi.nlm.nih.gov/pubmed/26818751
Gross, B. L.	USDA-ARS, National Center for Genetic Resource Preservation, 1111 S. Mason Street, Ft. Collins, CO 80521, USA. Briana.Gross@ars.usda.gov	MADS-box out of the black box	MADS-box out of the black box	2011	Adaptation, Physiological/*genetics/physiology	The compelling elegance of using genome-wide scans to detect the signature of selection is difficult to resist, but is countered by the low demonstrated efficacy of pinpointing the actual genes and traits that are the targets of selection in nonmodel species. While the difficulty of going from a suggestive signature to a functional nucleotide polymorphism should not prevent researchers from using…	researchers have gone a long way towards increasing the relevance of genome-wide scans for selection via two approaches . they tailored the markers used in the scan to target a family of developmental genes that were good candidates for controlling a trait of interest . and they used an independent mapping population to confirm the association of the gene with polymorphism .	Mol Ecol	20	1	25-Jun	1365-294X (Electronic)	10.1111/j.1365-294X.2010.04894.x	https://www.ncbi.nlm.nih.gov/pubmed/21158995
Grzybkowska, D. | Nowak, K. | Gaj, M. D.	Faculty of Natural Sciences, Institute of Biology, Biotechnology and Environmental Protection, University of Silesia in Katowice, Jagiellonska 28, 40-032 Katowice, Poland.	Hypermethylation of Auxin-Responsive Motifs in the Promoters of the Transcription Factor Genes Accompanies the Somatic Embryogenesis Induction in Arabidopsis	Hypermethylation of Auxin-Responsive Motifs in the Promoters of the Transcription Factor Genes Accompanies the Somatic Embryogenesis Induction in Arabidopsis	2020	Amino Acid Motifs/drug effects	The auxin-induced embryogenic reprogramming of plant somatic cells is associated with extensive modulation of the gene expression in which epigenetic modifications, including DNA methylation, seem to play a crucial role. However, the function of DNA methylation, including the role of auxin in epigenetic regulation of the SE-controlling genes, remains poorly understood. Hence, in the present study…	auxin-induced embryogenic reprogramming of plant somatic cells is associated with extensive modulation of gene expression . the function of DNA methylation, including the role of auxin in epigenetic regulation of the SE-controlling genes, remains poorly understood .	Int J Mol Sci	21	18		1422-0067 (Electronic)	10.3390/ijms21186849	https://www.ncbi.nlm.nih.gov/pubmed/32961931
Gu, Q. | Ferrandiz, C. | Yanofsky, M. F. | Martienssen, R.	Cold Spring Harbor Laboratory, Cold Spring Harbor, NY 11724, USA.	The FRUITFULL MADS-box gene mediates cell differentiation during Arabidopsis fruit development	The FRUITFULL MADS-box gene mediates cell differentiation during Arabidopsis fruit development	1998	Arabidopsis/cytology/*genetics/*growth & development	Fruit morphogenesis is a process unique to flowering plants, and yet little is known about its developmental control. Following fertilization, fruits typically undergo a dramatic enlargement that is accompanied by differentiation of numerous distinct cell types. We have identified a mutation in Arabidopsis called fruitfull (ful-1) , which abolishes elongation of the silique after fertilization. T…	fruitfull (ful-1) mutation abolishes elongation of the silique after fertilization . lack of coordinated growth of fruit tissues leads to crowded seeds, failure of dehiscence . ful cauline leaves are broader than those of wild type and show a reduction in internal cell layers .	Development	125	8	1509-17	0950-1991 (Print)	10.1242/dev.125.8.1509	https://www.ncbi.nlm.nih.gov/pubmed/9502732
Gu, X. | Le, C. | Wang, Y. | Li, Z. | Jiang, D. | Wang, Y. | He, Y.	Department of Biological Sciences, National University of Singapore, Singapore 117543, Singapore.	Arabidopsis FLC clade members form flowering-repressor complexes coordinating responses to endogenous and environmental cues	Arabidopsis FLC clade members form flowering-repressor complexes coordinating responses to endogenous and environmental cues	2013	Arabidopsis/genetics/growth & development/*physiology	The developmental transition to flowering is timed by endogenous and environmental signals through multiple genetic pathways. In Arabidopsis, the MADS-domain protein FLOWERING LOCUS C is a potent flowering repressor. Here, we report that the FLOWERING LOCUS C clade member MADS AFFECTING FLOWERING3 acts redundantly with another clade member to directly repress expression of the florigen FLOWERING …	the developmental transition to flowering is timed by endogenous and environmental signals through multiple genetic pathways . in Arabidopsis, the MADS-domain protein FLOWERING LOCUS C is a potent flowering repressor .	Nat Commun	4		1947	2041-1723 (Electronic)	10.1038/ncomms2947	https://www.ncbi.nlm.nih.gov/pubmed/23770815
Guan, H. | Wang, H. | Huang, J. | Liu, M. | Chen, T. | Shan, X. | Chen, H. | Shen, J.	Key Laboratory of Biology and Germplasm Enhancement of Horticultural Crops in South China, Ministry of Agriculture, South China Agricultural University, Guangzhou 510642, China.	Genome-Wide Identification and Expression Analysis of MADS-Box Family Genes in Litchi (Litchi chinensis Sonn.) and Their Involvement in Floral Sex Determination	Genome-Wide Identification and Expression Analysis of MADS-Box Family Genes in Litchi (Litchi chinensis Sonn.) and Their Involvement in Floral Sex Determination	2021	MADS-box genes	Litchi possesses unique flower morphology and adaptive reproduction strategies. Although previous attention has been intensively devoted to the mechanisms underlying its floral induction, the molecular basis of flower sex determination remains largely unknown. MADS-box genes are promising candidates for this due to their significant roles in various aspects of inflorescence and flower organogenes…	litchi possesses unique flower morphology and adaptive reproduction strategies . the molecular basis of flower sex determination remains largely unknown . phylogeny and expression profiles of 101 MADS-box genes are presented .	Plants (Basel)	10	10		2223-7747 (Print)	10.3390/plants10102142	https://www.ncbi.nlm.nih.gov/pubmed/34685951
Guo, S. | Zheng, Y. | Meng, D. | Zhao, X. | Sang, Z. | Tan, J. | Deng, Z. | Lang, Z. | Zhang, B. | Wang, Q. | Bouzayen, M. | Zuo, J.	Institute of Agri-food Processing and Nutrition, Key Laboratory of Vegetable Postharvest Processing of Ministry of Agriculture and Rural Areas, Beijing Key Laboratory of Fruits and Vegetable Storage and Processing, Beijing Academy of Agricultural and Forestry Sciences, Beijing, 100097, China.	DNA and coding/non-coding RNA methylation analysis provide insights into tomato fruit ripening	DNA and coding/non-coding RNA methylation analysis provide insights into tomato fruit ripening	2022	*Solanum lycopersicum/genetics/metabolism	Ripening is the last, irreversible developmental stage during which fruit become palatable, thus promoting seed dispersal by frugivory. In Alisa Craig fruit, mRNAs with increasing m5C levels, such as STPK and WRKY 40, were identified as being involved in response to biotic and abiotic stresses. Furthermore, two mRNAs involved in cell wall metabolism, PG and EXP-B1, also presented increased m5C le…	in the Nr mutant, several m5C-modified mRNAs involved in fruit ripening, including those encoding WRKY and MADS-box proteins, were found . a combined analysis of changes in 5mC methylation revealed many differentially expressed genes with differentially methylated regions . these included transcription factors and key enzymes related to ethylene biosynthesis and signal transduction .	Plant J	112	2	399-413	1365-313X (Electronic)	10.1111/tpj.15951	https://www.ncbi.nlm.nih.gov/pubmed/36004545
Guo, X. | Chen, G. | Naeem, M. | Yu, X. | Tang, B. | Li, A. | Hu, Z.	Laboratory of Molecular Biology of Tomato, Bioengineering College, Chongqing University, Chongqing 400044, People's Republic of China.	The MADS-box gene SlMBP11 regulates plant architecture and affects reproductive development in tomato plants	The MADS-box gene SlMBP11 regulates plant architecture and affects reproductive development in tomato plants	2017	Gene Expression Regulation, Plant/genetics/physiology	MADS-domain proteins are important transcription factors that are involved in many biological processes of plants. In the present study, SlMBP11, a member of the AGL15 subfamily, was cloned in tomato plants (Solanum lycopersicon M.) . SlMBP11 is ubiquitously expressed in all of the tissues we examined, whereas the SlMBP11 transcription levels were significantly higher in reproductive tissues than…	SlMBP11 is ubiquitously expressed in all of the tissues we examined . overexpression lines display increased axillary buds . findings add a new class of transcription factors to the group of genes regulating plant architecture and reproductive development .	Plant Sci	258		90-101	1873-2259 (Electronic)	10.1016/j.plantsci.2017.02.005	https://www.ncbi.nlm.nih.gov/pubmed/28330566
Guo, X. | Liang, R. | Lou, S. | Hou, J. | Chen, L. | Liang, X. | Feng, X. | Yao, Y. | Liu, J. | Liu, H.	Key Laboratory for Bio-Resource and Eco-Environment of Ministry of Education & Sichuan Zoige Alpine Wetland Ecosystem National Observation and Research Station, College of Life Science, Sichuan University, Chengdu, Sichuan 610065, China.	Natural variation in the SVP contributes to the pleiotropic adaption of Arabidopsis thaliana across contrasted habitats	Natural variation in the SVP contributes to the pleiotropic adaption of Arabidopsis thaliana across contrasted habitats	2023	*Arabidopsis/genetics/metabolism	Coordinated plant adaptation involves the interplay of multiple traits driven by habitat-specific selection pressures. Pleiotropic effects, wherein genetic variants of a single gene control multiple traits, can expedite such adaptations. Until present, only a limited number of genes have been reported to exhibit pleiotropy. Here, we create a recombinant inbred line (RIL) population derived from t…	a recombinant inbred line (RIL) population is derived from two A. thaliana ecotypes . we identify an allelic variation in a MADS-box transcription factor, SHORT VEGETATIVE PHASE . a natural null variant of the SVP protein disrupts its normal regulatory interactions with target genes .	J Genet Genomics	50	12	993-1003	1673-8527 (Print)	10.1016/j.jgg.2023.08.004	https://www.ncbi.nlm.nih.gov/pubmed/37633338
Hacham, Y. | Holland, N. | Butterfield, C. | Ubeda-Tomas, S. | Bennett, M. J. | Chory, J. | Savaldi-Goldstein, S.	Faculty of Biology, Technion-Israel Institute of Technology, Haifa, Israel.	Brassinosteroid perception in the epidermis controls root meristem size	Brassinosteroid perception in the epidermis controls root meristem size	2011	Arabidopsis/growth & development	Multiple small molecule hormones contribute to growth promotion or restriction in plants. Brassinosteroids (BRs) , acting specifically in the epidermis, can both drive and restrict shoot growth. However, our knowledge of how BRs affect meristem size is scant. Here, we study the root meristem and show that BRs are required to maintain normal cell cycle activity and cell expansion. These two proces…	brassinosteroids (BRs) can both drive and restrict shoot growth . but our knowledge of how BRs affect meristem size is scant . BR signaling in root epidermis and not in inner endodermis is sufficient .	Development	138	5	839-48	1477-9129 (Electronic)	10.1242/dev.061804	https://www.ncbi.nlm.nih.gov/pubmed/21270053
Haghighi, R. | Sayed Tabatabaei, B. E. | Maibody, Samm | Talebi, M. | Molina, R. V. | Nebauer, S. G. | Renau-Morata, B.	Department of Agronomy and Plant Breeding, College of Agriculture, Isfahan University of Technology, Isfahan, 8415683111, Iran.	A flowering inhibitor of the temperature-dependent pathway in Crocus sativus L	A flowering inhibitor of the temperature-dependent pathway in Crocus sativus L	2020	Base Sequence	Saffron is the world highest-priced spice because its production requires intensive hand labour. Reduce saffron production costs require containerised plant production under controlled conditions and expand the flowering period. Controlling the flowering process and identify the factors involved in saffron flowering is crucial to introduce technical improvements. The research carried out so far i…	saffron is the world's highest-priced spice because its production requires intensive hand labour . the research carried out so far has allowed an extensive knowledge of the influence of temperature on the flower induction .	Mol Biol Rep	47	3	2171-2179	1573-4978 (Electronic)	10.1007/s11033-020-05316-7	https://www.ncbi.nlm.nih.gov/pubmed/32065325
Hamza, R. | Roque, E. | Gomez-Mena, C. | Madueno, F. | Beltran, J. P. | Canas, L. A.	Department of Plant Development and Hormone Action, Instituto de Biologia Molecular y Celular de Plantas (CSIC-Universitat Politecnica de Valencia) , Ciudad Politecnica de la Innovacion, Valencia, Spain.	PsEND1 Is a Key Player in Pea Pollen Development Through the Modulation of Redox Homeostasis	PsEND1 Is a Key Player in Pea Pollen Development Through the Modulation of Redox Homeostasis	2021	CArG boxes	Redox homeostasis has been linked to proper anther and pollen development. Accordingly, plant cells have developed several Reactive Oxygen Species (ROS) -scavenging mechanisms to maintain the redox balance. Hemopexins constitute one of these mechanisms preventing heme-associated oxidative stress in animals, fungi, and plants. Pisum sativum ENDOTHECIUM 1 (PsEND1) is a pea anther-specific gene that…	plant cells have developed several mechanisms to maintain the redox balance . hemopexins constitute one of these mechanisms preventing heme-associated oxidative stress .	Front Plant Sci	12		765277	1664-462X (Print)	10.3389/fpls.2021.765277	https://www.ncbi.nlm.nih.gov/pubmed/34777450
Han, J. J. | Jackson, D. | Martienssen, R.	Cold Spring Harbor Laboratory, Cold Spring Harbor, NY 11724, USA.	Pod corn is caused by rearrangement at the Tunicate1 locus	Pod corn is caused by rearrangement at the Tunicate1 locus	2012	Alleles	Pod corn (Zea mays var tunicata) was once regarded as ancestral to cultivated maize, and was prized by pre-Columbian cultures for its magical properties. Tunicate1 (Tu1) is a dominant pod corn mutation in which kernels are completely enclosed in leaflike glumes. Here we show that Tu1 encodes a MADS box transcription factor expressed in leaves whose 5' regulatory region is fused by a 1.8-Mb chromo…	Pod corn (Zea maysvartunicata) was once regarded as ancestral to cultivated maize . it was prized by pre-Columbian cultures for its magical properties . tu1encodes a MADS box transcription factor expressed in leaves .	Plant Cell	24	7	2733-44	1532-298X (Electronic)	10.1105/tpc.112.100537	https://www.ncbi.nlm.nih.gov/pubmed/22829149
Han, P. | Garcia-Ponce, B. | Fonseca-Salazar, G. | Alvarez-Buylla, E. R. | Yu, H.	Plant Functional Genomics Laboratory, Department of Biological Sciences, Faculty of Science, National University of Singapore, 14 Science Drive 4, 117543, Singapore.	AGAMOUS-LIKE 17, a novel flowering promoter, acts in a FT-independent photoperiod pathway	AGAMOUS-LIKE 17, a novel flowering promoter, acts in a FT-independent photoperiod pathway	2008	Arabidopsis/*metabolism	The photoperiod pathway is a genetically conserved pathway that affects flowering in distantly related angiosperms. Here we report a novel flowering promoter AGAMOUS-LIKE 17 (AGL17) acting in the photoperiod pathway of Arabidopsis. AGL17 transcripts were detectable in various plant organs with the highest expression in the root. Under long-day conditions, expression of AGL17 gradually increased i…	the photoperiod pathway is a genetically conserved pathway that affects flowering in distantly related angiosperms . AGL17 transcripts were detectable in various plant organs with the highest expression in the root . overexpression of the gene caused early flowering, while loss of function exhibited late flowering .	Plant J	55	2	253-65	1365-313X (Electronic)	10.1111/j.1365-313X.2008.03499.x	https://www.ncbi.nlm.nih.gov/pubmed/18363787
Han, Y. | Chen, Z. | Lv, S. | Ning, K. | Ji, X. | Liu, X. | Wang, Q. | Liu, R. | Fan, S. | Zhang, X.	Plant Science and Technology College, Beijing University of Agriculture/New Technological Laboratory in Agriculture Application in Beijing Beijing, China.	MADS-Box Genes and Gibberellins Regulate Bolting in Lettuce (Lactuca sativa L.)	MADS-Box Genes and Gibberellins Regulate Bolting in Lettuce (Lactuca sativa L.)	2016	RNA-Seq	Bolting in lettuce is promoted by high temperature and bolting resistance is of great economic importance for lettuce production. But how bolting is regulated at the molecular level remains elusive. Here, a bolting resistant line S24 and a bolting sensitive line S39 were selected for morphological, physiological, transcriptomic and proteomic comparisons. A total of 12204 genes were differentially…	bolting resistance is of great economic importance for lettuce production . but how bolting is regulated at the molecular level remains elusive . a total of 12204 genes were differentially expressed in S39 vs. S24 .	Front Plant Sci	7		1889	1664-462X (Print)	10.3389/fpls.2016.01889	https://www.ncbi.nlm.nih.gov/pubmed/28018414
Hao, X. | Chao, W. | Yang, Y. | Horvath, D.	Tea Research Institute, Chinese Academy of Agricultural Sciences; National Center for Tea Improvement, Key Laboratory of Tea Biology and Resources Utilization, Ministry of Agriculture, No. 9 south Meiling Road, Hangzhou, Zhejiang 310008, China; United States Department of Agriculture, Agriculture Research Services, Bioscience Research Laboratory, 1605 Albrecht Blvd, Fargo, North Dakota, 58105, Un…	Coordinated Expression of FLOWERING LOCUS T and DORMANCY ASSOCIATED MADS-BOX-Like Genes in Leafy_spurge	Coordinated Expression of FLOWERING LOCUS T and DORMANCY ASSOCIATED MADS-BOX-Like Genes in Leafy_spurge	2015	Chromatin Immunoprecipitation	Leafy_spurge (Euphorbia esula L.) is a noxious perennial weed that produces underground adventitious buds, which are crucial for generating new vegetative shoots following periods of freezing temperatures or exposure to various control measures. It is also capable of flowering and producing seeds, but requires vernalization in some cases. DORMANCY ASSOCIATED MADS-BOX (DAM) genes have been propose…	leafy spurge is a noxious perennial weed that produces underground adventitious buds . the buds are crucial for generating new vegetative shoots following periods of freezing temperatures . they are also capable of flowering and producing seeds, but require vernalization .	PLoS One	10	5	e0126030	1932-6203 (Electronic)	10.1371/journal.pone.0126030	https://www.ncbi.nlm.nih.gov/pubmed/25961298
Hardenack, S. | Ye, D. | Saedler, H. | Grant, S.	Max-Planck-Institut fur Zuchtungsforschung, Cologne, Germany.	Comparison of MADS box gene expression in developing male and female flowers of the dioecious plant white_campion	Comparison of MADS box gene expression in developing male and female flowers of the dioecious plant white_campion	1994	Amino Acid Sequence	The MADS box motif is common to genes that regulate the pattern of flower development. To determine whether MADS box genes also play a role in differentiation of the sexes in dioecious plants, we isolated cDNAs (SLM1 to SLM5, for Silene latifolia MADS) with MADS box homology from transcripts of male flower buds of the model dioecious species white_campion and compared their expression in developi…	the MADS box motif is common to genes that regulate the pattern of flower development . cDNAs were isolated from male flower buds of the model dioecious species white campion . expression of SLM4 and SLM5 in both sexes differed from that of SQUAMOSA .	Plant Cell	6	12	1775-87	1040-4651 (Print)	10.1105/tpc.6.12.1775	https://www.ncbi.nlm.nih.gov/pubmed/7866023
Hart, J. K. | Hannapel, D. J.	Interdepartmental Genetics Major and Department of Horticulture, Iowa State University, Ames, IA 50011-1100, USA.	In situ hybridization of the MADS-box gene POTM1 during potato floral development	In situ hybridization of the MADS-box gene POTM1 during potato floral development	2002	In Situ Hybridization	The potato MADS-box gene POTM1 is a member of the SQUA-like family of plant MADS-box genes. The amino acid sequence of POTM1 most closely matches the sequence of PFG (Petunia Flowering Gene) , a petunia MADS-box gene involved in the transition from vegetative to reproductive development. To examine the likely role of POTM1 in potato reproductive tissue, in situ hybridizations were performed on se…	the amino acid sequence of POTM1 most closely matches the sequence of PFG . it is a petunia MADSbox gene involved in the transition from vegetative to reproductive development . mRNA accumulates in vegetative, inflorescence and floral meristems .	J Exp Bot	53	368	465-71	0022-0957 (Print)	10.1093/jexbot/53.368.465	https://www.ncbi.nlm.nih.gov/pubmed/11847245
He, J. | Alonge, M. | Ramakrishnan, S. | Benoit, M. | Soyk, S. | Reem, N. T. | Hendelman, A. | Van Eck, J. | Schatz, M. C. | Lippman, Z. B.	Cold Spring Harbor Laboratory, Cold Spring Harbor, New York 11724, USA.	Establishing Physalis as a Solanaceae model system enables genetic reevaluation of the inflated calyx syndrome	Establishing Physalis as a Solanaceae model system enables genetic reevaluation of the inflated calyx syndrome	2023	*Solanaceae/genetics	The highly diverse Solanaceae family contains several widely studied models and crop species. Fully exploring, appreciating, and exploiting this diversity requires additional model systems. Particularly promising are orphan fruit crops in the genus Physalis, which occupy a key evolutionary position in the Solanaceae and capture understudied variation in traits such as inflorescence complexity, fr…	orphan fruit crops in the genusPhysalis occupy a key evolutionary position in theSolanaceae . they capture understudied variation in traits such as inflorescence complexity, fruit ripening and metabolites, disease and insect resistance, self-compatibility, and inflated calyx syndrome .	Plant Cell	35	1	351-368	1532-298X (Electronic)	10.1093/plcell/koac305	https://www.ncbi.nlm.nih.gov/pubmed/36268892
He, S. | Ma, R. | Liu, Z. | Zhang, D. | Wang, S. | Guo, Y. | Chen, M.	State Key Laboratory of Crop Stress Biology for Arid Areas, National Yangling Agricultural Biotechnology & Breeding Center, Shaanxi Key Laboratory of Crop Heterosis, and College of Agronomy, Northwest A&F University, Yangling 712100, Shaanxi, China.	Overexpression of BnaAGL11, a MADS-Box Transcription Factor, Regulates Leaf Morphogenesis and Senescence in Brassica napus	Overexpression of BnaAGL11, a MADS-Box Transcription Factor, Regulates Leaf Morphogenesis and Senescence in Brassica napus	2022	*Arabidopsis/genetics	Previous studies have reported that SEEDSTICK/AGAMOUS-LIKE 11 (AtSTK/AtAGL11) , a MADS-box transcription factor, plays important roles in many biological processes in Arabidopsis thaliana. However, the function of BnaAGL11, an AtAGL11 homologous gene from Brassica napus, in leaf development remains unknown. Here, we found that the ectopic expression of any copy of Bna.C09.AGL11, Bna.A03.AGL11, an…		J Agric Food Chem	70	11	3420-3434	1520-5118 (Electronic)	10.1021/acs.jafc.1c07622	https://www.ncbi.nlm.nih.gov/pubmed/35261232
He, S. | Min, Y. | Liu, Z. | Zhi, F. | Ma, R. | Ge, A. | Wang, S. | Zhao, Y. | Peng, D. | Zhang, D. | Jin, M. | Song, B. | Wang, J. | Guo, Y. | Chen, M.	State Key Laboratory for Crop Stress Resistance and High-Efficiency Production, National Yangling Agricultural Biotechnology & Breeding Center, Shaanxi Key Laboratory of Crop Heterosis, College of Agronomy, Northwest A&F University, Yangling, 712100, China.	Antagonistic MADS-box transcription factors SEEDSTICK and SEPALLATA3 form a transcriptional regulatory network that regulates seed oil accumulation	Antagonistic MADS-box transcription factors SEEDSTICK and SEPALLATA3 form a transcriptional regulatory network that regulates seed oil accumulation	2024	Transcription Factors/genetics/metabolism	Transcriptional regulation is essential for balancing multiple metabolic pathways that influence oil accumulation in seeds. Thus far, the transcriptional regulatory mechanisms that govern seed oil accumulation remain largely unknown. Here, we identified the transcriptional regulatory network composed of MADS-box transcription factors SEEDSTICK (STK) and SEPALLATA3 (SEP3) , which bridges several k…	transcriptional regulation is essential for balancing multiple metabolic pathways that influence oil accumulation in seeds . here, we identified the transcriptional regulatory network composed of MADS-box transcription factors SEEDSTICK (STK) and SEPALLATA3 (SEP3), which bridges several key genes to regulate oil accumulation .	J Integr Plant Biol	66	1	121-142	1744-7909 (Electronic)	10.1111/jipb.13606	https://www.ncbi.nlm.nih.gov/pubmed/38146678
Hehenberger, E. | Kradolfer, D. | Kohler, C.	Department of Biology and Zurich-Basel Plant Science Center, Swiss Federal Institute of Technology, CH-8092 Zurich, Switzerland.	Endosperm cellularization defines an important developmental transition for embryo development	Endosperm cellularization defines an important developmental transition for embryo development	2012	Arabidopsis/*embryology/genetics	The endosperm is a terminal seed tissue that is destined to support embryo development. In most angiosperms, the endosperm develops initially as a syncytium to facilitate rapid seed growth. The transition from the syncytial to the cellularized state occurs at a defined time point during seed development. Manipulating the timing of endosperm cellularization through interploidy crosses negatively i…	the endosperm is a terminal seed tissue that is destined to support embryo development . in most angiosperms, the syncytial to the cellularized state occurs at a defined time point . failure of cellularization in fertilization independent seed 2 (fis2) and defective 1 (ede1) mutants .	Development	139	11	2031-9	1477-9129 (Electronic)	10.1242/dev.077057	https://www.ncbi.nlm.nih.gov/pubmed/22535409
Heiduk, A. | Pramanik, D. | Spaans, M. | Gast, L. | Dorst, N. | van Heuven, B. J. | Gravendeel, B.	School of Life Sciences, University of KwaZulu-Natal, Private Bag X01, Scottsville, Pietermaritzburg 3209, South Africa.	Pitfall Flower Development and Organ Identity of Ceropegia sandersonii (Apocynaceae-Asclepiadoideae)	Pitfall Flower Development and Organ Identity of Ceropegia sandersonii (Apocynaceae-Asclepiadoideae)	2020	Ceropegia	Deceptive Ceropegia pitfall flowers are an outstanding example of synorganized morphological complexity. Floral organs functionally synergise to trap fly-pollinators inside the fused corolla. Successful pollination requires precise positioning of flies headfirst into cavities at the gynostegium. These cavities are formed by the corona, a specialized organ of corolline and/or staminal origin. The …	ceropegia pitfall flowers are an outstanding example of synorganized morphological complexity . floral organs functionally synergise to trap fly-pollinators inside the fused corolla . successful pollination requires precise positioning of flies headfirst into cavities .	Plants (Basel)	9	12		2223-7747 (Print)	10.3390/plants9121767	https://www.ncbi.nlm.nih.gov/pubmed/33327479
Hemming, M. N. | Trevaskis, B.	CSIRO Division of Plant Industry, PO Box 1600, Canberra, ACT 2601, Australia. megan.hemming@csiro.au	Make hay when the sun shines: the role of MADS-box genes in temperature-dependant seasonal flowering responses	Make hay when the sun shines: the role of MADS-box genes in temperature-dependant seasonal flowering responses	2011	Arabidopsis/*genetics/growth & development/metabolism	MADS-box transcription factors specify plant meristem identity. In doing so, they determine when floral organs are produced at the shoot apex and control the timing of flowering. The transcriptional activity of key MADS-box genes is controlled by temperature in many plants, and this synchronises flowering with changing seasons. Here we review how seasonal temperature variation influences the deve…	transcriptional activity of key MADS-box genes is controlled by temperature . transcription factors determine when floral organs are produced at the shoot apex and control the timing of flowering . a potential role for SHORT VEGETATIVE PHASE-like genes in controlling winter bud dormancy is also examined .	Plant Sci	180	3	447-53	1873-2259 (Electronic)	10.1016/j.plantsci.2010.12.001	https://www.ncbi.nlm.nih.gov/pubmed/21421391
Henschel, K. | Kofuji, R. | Hasebe, M. | Saedler, H. | Munster, T. | Theissen, G.	Department of Molecular Plant Genetics, Max Planck Institute for Breeding Research, Cologne, Germany.	Two ancient classes of MIKC-type MADS-box genes are present in the moss Physcomitrella patens	Two ancient classes of MIKC-type MADS-box genes are present in the moss Physcomitrella patens	2002	Amino Acid Sequence	Characterization of seven MADS-box genes, termed PPM1-PPM4 and PpMADS1-PpMADS3, from the moss model species Physcomitrella patens is reported. Phylogeny reconstructions and comparison of exon-intron structures revealed that the genes described here represent two different classes of homologous, yet distinct, MIKC-type MADS-box genes, termed MIKC (c) -type genes-" (c) " stands for "classic"- (PPM1…	phylogeny reconstructions reveal two different classes of MIKC-type MADS-box genes . the two gene classes deviate from each other in a characteristic way, especially in the intervening region .	Mol Biol Evol	19	6	801-14	0737-4038 (Print)	10.1093/oxfordjournals.molbev.a004137	https://www.ncbi.nlm.nih.gov/pubmed/12032236
Heo, S. | Chung, Y. S.	apple (Malus domesticus) Research Institute, National Institute of Horticultural and Herbal Science, Rural Development Administration, Gunwi, 39000, South Korea.	Validation of MADS-box genes from apple (Malus domesticus) fruit pedicels during early fruit abscission by transcriptome analysis and real-time PCR	Validation of MADS-box genes from apple (Malus domesticus) fruit pedicels during early fruit abscission by transcriptome analysis and real-time PCR	2019	Fruit/genetics/metabolism	BACKGROUND: Fruit abscission in an isolated region called abscission zone (AZ) is regulated by several genes including JOINTLESS, MACROCALYX and SEPALLATA, MADS-box genes, in tomato. OBJECTIVE: The surviving central pedicels and the abscised lateral pedicels were examined in fruit clusters in order to investigate apple (Malus domesticus) MADS-box genes from fruit pedicels of self-abscising apple …	fruit abscission is regulated by several genes including JOINTLESS, MACROCALYX and SEPALLATA, MADS-box genes, in tomato . the surviving central pedicels and the lateral pedicles were examined in fruit clusters . transcription profiling was carried out on the apple 'Saika' genes .	Genes Genomics	41	11	1241-1251	2092-9293 (Electronic)	10.1007/s13258-019-00852-4	https://www.ncbi.nlm.nih.gov/pubmed/31350732
Hileman, L. C. | Sundstrom, J. F. | Litt, A. | Chen, M. | Shumba, T. | Irish, V. F.	Department of Molecular, Cellular and Developmental Biology, Yale University, USA.	Molecular and phylogenetic analyses of the MADS-box gene family in tomato	Molecular and phylogenetic analyses of the MADS-box gene family in tomato	2006	Arabidopsis/genetics	MIKCc-type MADS-box genes encode key transcriptional regulators of a variety of developmental processes in Arabidopsis thaliana. However, there has been relatively little effort to systematically carry out comparative genomic or functional analyses of these genes across flowering plants. Here we describe a strategy to identify members of the MIKCc-type MADS-box gene family from any angiosperm spe…	MIKCc-type MADS-box genes encode key transcriptional regulators of a variety of developmental processes inArabidopsis thaliana . there has been relatively little effort to systematically carry out comparative genomic or functional analyses of these genes across flowering plants . phylogenetic analyses indicate there have been a number of gene duplication and loss events in tomato .	Mol Biol Evol	23	11	2245-58	0737-4038 (Print)	10.1093/molbev/msl095	https://www.ncbi.nlm.nih.gov/pubmed/16926244
Hoffmann, T. | Shi, X. | Hsu, C. Y. | Brown, A. | Knight, Q. | Courtney, L. S. | Mukarram, R. J. | Wang, D.	Biology Department, Spelman College, Atlanta, GA, USA.	The identification of type I MADS box genes as the upstream activators of an endosperm-specific invertase inhibitor in Arabidopsis	The identification of type I MADS box genes as the upstream activators of an endosperm-specific invertase inhibitor in Arabidopsis	2022	Arabidopsis/enzymology/*genetics	BACKGROUND: Nuclear endosperm development is a common mechanism among Angiosperms, including Arabidopsis. During nuclear development, the endosperm nuclei divide rapidly after fertilization without cytokinesis to enter the syncytial phase, which is then followed by the cellularized phase. The endosperm can be divided into three spatial domains with distinct functions: the micropylar, peripheral, …	nuclear endosperm development is a common mechanism among Angiosperms, including Arabidopsis . ectopically expressing InvINH1 led to a reduction in embryo growth rate . type I MADS box transcription factors can form dimers to activate invINh1 promoter .	BMC Plant Biol	22	1	18	1471-2229 (Electronic)	10.1186/s12870-021-03399-3	https://www.ncbi.nlm.nih.gov/pubmed/34991468
Honma, T. | Goto, K.	Institute for Chemical Research, Kyoto University, Uji, Japan.	Complexes of MADS-box proteins are sufficient to convert leaves into floral organs	Complexes of MADS-box proteins are sufficient to convert leaves into floral organs	2001	*Arabidopsis	Genetic studies, using floral homeotic mutants, have led to the ABC model of flower development. This model proposes that the combinatorial action of three sets of genes, the A, B and C function genes, specify the four floral organs (sepals, petals, stamens and carpels) in the concentric floral whorls. However, attempts to convert vegetative organs into floral organs by altering the expression of…	genetic studies have led to the ABC model of flower development . the model specifies the four floral organs in the concentric floral whorls . attempts to convert vegetative organs into flowers have been unsuccessful . here we show that class B proteins interact with APETALA1 (AP1) and SEPALLATA3 (SEP3)	Nature	409	6819	525-9	0028-0836 (Print)	10.1038/35054083	https://www.ncbi.nlm.nih.gov/pubmed/11206550
Hou, Chen | Li, Lingfei | Liu, Zhiming | Su, Yingjuan | Wan, Tao		Diversity and Expression Patterns of MADS-Box Genes in Gnetum luofuense-implications for Functional Diversity and Evolution	Diversity and Expression Patterns of MADS-Box Genes in Gnetum luofuenseâImplications for Functional Diversity and Evolution	2019		MADS-box transcription factors are essential mediators of the vegetative and reproductive development of seed plants. Although MADS-box genes have been extensively characterized in angiosperms, their functions are not well-understood in gymnosperms, especially the Gnetales, due to an ambiguous phylogeny of seed plants. Here, we performed a genome-wide search for MADS-box genes in Gnetum luofuense…	a genome-wide search for MADS-box genes in gymnosperms found 11 Type I and 38 Type II members . the relative abundance of the Type I M and Type II MIKCC subgroups was mainly contributed by tandem duplications .	Tropical Plant Biology	13	1	36-49	1935-9756	10.1007/s12042-019-09247-x
Hou, X. J. | Ye, L. X. | Ai, X. Y. | Hu, C. G. | Cheng, Z. P. | Zhang, J. Z.	Key Laboratory of Horticultural Plant Biology (Ministry of Education) , College of Horticulture and Forestry Science, Huazhong Agricultural University, Wuhan 430070, China; School of Horticulture and Landscape Architecture, Henan Institute of Science and Technology, Xinxiang 453003, China.	Functional analysis of a PISTILLATA-like gene CcMADS20 involved in floral organs specification in citrus	Functional analysis of a PISTILLATA-like gene CcMADS20 involved in floral organs specification in citrus	2022	*Arabidopsis/metabolism	PISTILLATA (PI) , as a member of MADS-box transcription factor, plays an important role in petal and stamen specification in Arabidopsis. However, little is known about PI-like genes in citrus. To understand the molecular mechanism of PI during the developmental process of citrus flower, a PI-like gene CcMADS20 was isolated from Citrus Clemantina. Sequence alignment and phylogenetic analysis reve…	CcMADS20 was specifically expressed in petal and stamen of citrus flower . ectopic overexpression in Arabidopsis resulted in transformation of sepals into petal-like structure .	Plant Sci	319		111263	1873-2259 (Electronic)	10.1016/j.plantsci.2022.111263	https://www.ncbi.nlm.nih.gov/pubmed/35487669
Hsu, H. F. | Chen, W. H. | Shen, Y. H. | Hsu, W. H. | Mao, W. T. | Yang, C. H.	Institute of Biotechnology, National Chung Hsing University, Taichung, Taiwan, 40227, ROC.	Multifunctional evolution of B and AGL6 MADS box genes in orchids	Multifunctional evolution of B and AGL6 MADS box genes in orchids	2021	Anthocyanins/metabolism	We previously found that B and AGL6 proteins form L (OAP3-2/OAGL6-2/OPI) and SP (OAP3-1/OAGL6-1/OPI) complexes to determine lip/sepal/petal identities in orchids. Here, we show that the functional L' (OAP3-1/OAGL6-2/OPI) and SP' (OAP3-2/OAGL6-1/OPI) complexes likely exist and AP3/PI/AGL6 genes have acquired additional functions during evolution. We demonstrate that the presumed L' complex changes…	B class AP3/PI and AGL6-like MADS proteins determine lips and sepals/petals identities in orchids . functional proteins OAP3-1/OPI and OAGL6-1 could function separately to suppress sepal/petal senescence and promote pedicel abscission .	Nat Commun	12	1	902	2041-1723 (Electronic)	10.1038/s41467-021-21229-w	https://www.ncbi.nlm.nih.gov/pubmed/33568671
Hsu, W. H. | Yeh, T. J. | Huang, K. Y. | Li, J. Y. | Chen, H. Y. | Yang, C. H.	Institute of Biotechnology, National Chung Hsing University, Taichung, 40227, Taiwan.	AGAMOUS-LIKE13, a putative ancestor for the E functional genes, specifies male and female gametophyte morphogenesis	AGAMOUS-LIKE13, a putative ancestor for the E functional genes, specifies male and female gametophyte morphogenesis	2014	Arabidopsis/cytology/*genetics/growth & development	Arabidopsis AGL13 is a member of the AGL6 clade of the MADS box gene family. GUS activity was specifically detected from the initiation to maturation of both pollen and ovules in AGL13:GUS Arabidopsis. The sterility of the flower with defective pollen and ovules was found in AGL13 RNAi knockdown and AGL13 + SRDX dominant-negative mutants. These results indicate that AGL13 acts as an activator in …	arabidopsis AGL13 is a member of the AGL6 clade of the MADS box gene family . GUS activity was specifically detected from the initiation to maturation of both pollen and ovules .	Plant J	77	1	Jan-15	1365-313X (Electronic)	10.1111/tpj.12363	https://www.ncbi.nlm.nih.gov/pubmed/24164574
Htwe, Y. M. | Shi, P. | Zhang, D. | Li, Z. | Xiao, Y. | Yang, Y. | Lei, X. | Wang, Y.	Hainan Key Laboratory of Tropical Oil Crops Biology/Coconut Research Institute of Chinese Academy of Tropical Agricultural Sciences, Wenchang, China.	Programmed Cell Death May Be Involved in the Seedless Phenotype Formation of oil_palm	Programmed Cell Death May Be Involved in the Seedless Phenotype Formation of oil_palm	2022	4-coumarate-CoA ligase	oil_palm (Elaeis guineensis Jacq.) is a well-known vegetable oil-yielding crop. Seedlessness is one of the most prominent traits in oil_palm due to its low processing costs and high oil content. Nevertheless, an extensive study on molecular mechanisms regulating seedless phenotype formation in oil_palm is very limited so far. In this study, stigma, style, and ovary from seedless and seeded (Tener…	seedlessness is one of the most prominent traits in oil palm due to its low processing costs . boron treatment had no effect on seedless phenotype formation . results suggest a role of PCD in pollen tube lethality, leading to double fertilization failure .	Front Plant Sci	13		832017	1664-462X (Print)	10.3389/fpls.2022.832017	https://www.ncbi.nlm.nih.gov/pubmed/35401608
Hu, J. | Chang, X. | Zhang, Y. | Yu, X. | Qin, Y. | Sun, Y. | Zhang, L.	Fujian Provincial Key Laboratory of Haixia Applied Plant Systems Biology, College of Horticulture, Fujian Agriculture and Forestry University, Fuzhou, 350002, China.	The pineapple MADS-box gene family and the evolution of early monocot flower	The pineapple MADS-box gene family and the evolution of early monocot flower	2021	Amino Acid Sequence	Unlike the flower of the model monocot rice, which has diverged greatly from the ancestral monocot flower, the pineapple (Ananas comosus) flower is more typical of monocot flowers. Here, we identified 43 pineapple genes containing MADS-box domains, including 11 type I and 32 type II genes. RNA-seq expression data generated from five pineapple floral organs (sepals, petals, stamens, pistils, and o…	the pineapple (Ananas comosus) flower is more typical of monocot flowers . RNA-seq expression data generated from five pineapple floral organs revealed tissue-specific expression patterns for some genes . AcAGL6 and AcFUL1 were mainly expressed in sepals and petals .	Sci Rep	11	1	849	2045-2322 (Electronic)	10.1038/s41598-020-79163-8	https://www.ncbi.nlm.nih.gov/pubmed/33441609
Hu, J. | Chen, Q. | Idrees, A. | Bi, W. | Lai, Z. | Sun, Y.	Key Laboratory of Tea Science in Fujian Province, College of Horticulture, Fujian Agriculture and Forestry University, Fuzhou 350002, China.	Structural and Functional Analysis of the MADS-Box Genes Reveals Their Functions in Cold Stress Responses and Flower Development in Tea Plant (Camellia sinensis)	Structural and Functional Analysis of the MADS-Box Genes Reveals Their Functions in Cold Stress Responses and Flower Development in Tea Plant (Camellia sinensis)	2023	MADS-box	MADS-box genes comprise a large family of transcription factors that play crucial roles in all aspects of plant growth and development. However, no detailed information on the evolutionary relationship and functional characterization of MADS-box genes is currently available for some representative lineages, such as the Camellia plant. In this study, 136 MADS-box genes were detected from a referen…	in this study, 136 MADS-box genes were detected from a reference genome of the tea plant (Camellia sinensis) by employing a 569 bp HMM (Hidden Markov Model) developed using nucleotide sequencing . an additional twenty-seven genes were identified, with five MIKC-type genes .	Plants (Basel)	12	16		2223-7747 (Print)	10.3390/plants12162929	https://www.ncbi.nlm.nih.gov/pubmed/37631141
Hu, J. Y. | Zhou, Y. | He, F. | Dong, X. | Liu, L. Y. | Coupland, G. | Turck, F. | de Meaux, J.	Department of Plant Breeding and Genetics, Max-Planck-Institute for Plant Breeding Research, 50829 Cologne, Germany jinyong@mpipz.mpg.de.	miR824-Regulated AGAMOUS-LIKE16 Contributes to Flowering Time Repression in Arabidopsis	miR824-Regulated AGAMOUS-LIKE16 Contributes to Flowering Time Repression in Arabidopsis	2014		The timing of flowering is pivotal for maximizing reproductive success under fluctuating environmental conditions. Flowering time is tightly controlled by complex genetic networks that integrate endogenous and exogenous cues, such as light, temperature, photoperiod, and hormones. Here, we show that AGAMOUS-LIKE16 (AGL16) and its negative regulator microRNA824 (miR824) control flowering time in Ar…	the timing of flowering is pivotal for maximizing reproductive success . flowering time is tightly controlled by complex genetic networks . knockout of AGL16effectively accelerates flowering in nonvernalized Col-FRI .	Plant Cell	26	5	2024-2037	1532-298X (Electronic)	10.1105/tpc.114.124685	https://www.ncbi.nlm.nih.gov/pubmed/24876250
Hu, Y. | Wang, L. | Jia, R. | Liang, W. | Zhang, X. | Xu, J. | Chen, X. | Lu, D. | Chen, M. | Luo, Z. | Xie, J. | Cao, L. | Xu, B. | Yu, Y. | Persson, S. | Zhang, D. | Yuan, Z.	Joint International Research Laboratory of Metabolic & Developmental Sciences, Shanghai Jiao Tong University-University of Adelaide Joint Centre for Agriculture and Health, State Key Laboratory of Hybrid Rice, School of Life Sciences and Biotechnology, Shanghai Jiao Tong University, Shanghai, China.	Rice transcription factor MADS32 regulates floral patterning through interactions with multiple floral homeotic genes	Rice transcription factor MADS32 regulates floral patterning through interactions with multiple floral homeotic genes	2021	Flowers/*physiology	Floral patterning is regulated by intricate networks of floral identity genes. The peculiar MADS32 subfamily genes, absent in eudicots but prevalent in monocots, control floral organ identity. However, how the MADS32 family genes interact with other floral homeotic genes during flower development is mostly unknown. We show here that the rice homeotic transcription factor OsMADS32 regulates floral…	the rice homeotic transcription factor OsMADS32 regulates floral patterning . it interacts synergistically with the E class protein . how the gene interacts with other floral homeotic genes during flower development is unknown .	J Exp Bot	72	7	2434-2449	1460-2431 (Electronic)	10.1093/jxb/eraa588	https://www.ncbi.nlm.nih.gov/pubmed/33337484
Huang, B. | Hu, G. | Wang, K. | Frasse, P. | Maza, E. | Djari, A. | Deng, W. | Pirrello, J. | Burlat, V. | Pons, C. | Granell, A. | Li, Z. | van der Rest, B. | Bouzayen, M.	Universite de Toulouse, INRAe/INP Toulouse, UMR990 Genomique et Biotechnologie des Fruits, Avenue de l'Agrobiopole, Castanet-Tolosan, F-31326, France.	Interaction of two MADS-box genes leads to growth phenotype divergence of all-flesh type of tomatoes	Interaction of two MADS-box genes leads to growth phenotype divergence of all-flesh type of tomatoes	2021	Cell Proliferation/genetics	All-flesh tomato cultivars are devoid of locular gel and exhibit enhanced firmness and improved postharvest storage. Here, we show that SlMBP3 is a master regulator of locular tissue in tomato fruit and that a deletion at the gene locus underpins the All-flesh trait. Intriguingly, All-flesh varieties lack the deleterious phenotypes reported previously for SlMBP3 under-expressing lines and which p…	a deletion at the gene locus underpins the All-flesh trait in tomato fruit . a natural mutation at the SlAGL11 locus is responsible for the phenotypic divergence .	Nat Commun	12	1	6892	2041-1723 (Electronic)	10.1038/s41467-021-27117-7	https://www.ncbi.nlm.nih.gov/pubmed/34824241
Huang, B. | Routaboul, J. M. | Liu, M. | Deng, W. | Maza, E. | Mila, I. | Hu, G. | Zouine, M. | Frasse, P. | Vrebalov, J. T. | Giovannoni, J. J. | Li, Z. | van der Rest, B. | Bouzayen, M.	Universite de Toulouse, Institut National Polytechnique de Toulouse-Ecole Nationale Superieure Agronomique, Unite Mixte de Recherche 990 Genomique et Biotechnologie des Fruits, Castanet-Tolosan, F-31326, France.	Overexpression of the class D MADS-box gene Sl-AGL11 impacts fleshy tissue differentiation and structure in tomato fruits	Overexpression of the class D MADS-box gene Sl-AGL11 impacts fleshy tissue differentiation and structure in tomato fruits	2017	Flowers/genetics/*growth & development	MADS-box transcription factors are key elements of the genetic networks controlling flower and fruit development. Among these, the class D clade gathers AGAMOUS-like genes which are involved in seed, ovule, and funiculus development. The tomato genome comprises two class D genes, Sl-AGL11 and Sl-MBP3, both displaying high expression levels in seeds and in central tissues of young fruits. The pote…	the class D clade gathers AGAMOUS-like genes involved in seed, ovule, and funiculus development . the potential effects of Sl-AGL11 on fruit development were addressed . RNA-Seq transcriptomic profiling highlighted substantial metabolic reprogramming .	J Exp Bot	68	17	4869-4884	1460-2431 (Electronic)	10.1093/jxb/erx303	https://www.ncbi.nlm.nih.gov/pubmed/28992179
Huang, F. | Chi, Y. | Gai, J. | Yu, D.	National Key Laboratory of Crop Genetics and Germplasm Enhancement, National Center for Soybean Improvement, Nanjing Agricultural University, Nanjing, China.	Identification of transcription factors predominantly expressed in soybean flowers and characterization of GmSEP1 encoding a SEPALLATA1-like protein	Identification of transcription factors predominantly expressed in soybean flowers and characterization of GmSEP1 encoding a SEPALLATA1-like protein	2009	Amino Acid Motifs	By microarray analysis and real-time RT-PCR, we identified 28 soybean flower-enriched transcription factors such as MADS-box proteins, zinc finger proteins, and MYB proteins. Among them, one MADS-box protein GmSEP1 was chosen for further analysis. GmSEP1 contains 8 exons and 7 introns, showing similar exon-intron structure with Arabidopsis SEP genes. Phylogenetic analysis also suggested that GmSE…	phylogenetic analysis suggests that GmSEP1 belonged to AGL2/SEP subfamily . semi-quantitative RT-PCR showed that GsEP1 was predominantly expressed in reproductive organs . by real-time PCR, we found that expression of Gsp1 was altered during seed development .	Gene	438	01-Feb	40-8	1879-0038 (Electronic)	10.1016/j.gene.2009.03.002	https://www.ncbi.nlm.nih.gov/pubmed/19289160
Huang, F. | Liu, T. | Hou, X.	State Key Laboratory of Crop Genetics and Germplasm Enhancement, Key Laboratory of Biology and Germplasm Enhancement of Horticultural Crops in East China, Ministry of Agriculture, College of Horticulture, Nanjing Agricultural University, Nanjing, China.	Isolation and Functional Characterization of a Floral Repressor, BcMAF1, From Pak-choi (Brassica rapa ssp. Chinensis)	Isolation and Functional Characterization of a Floral Repressor, BcMAF1, From Pak-choi (Brassica rapa ssp. Chinensis)	2018	BcAP3	MADS-box genes form a large gene family in plants and are involved in multiple biological processes, such as flowering. However, the regulation mechanism of MADS-box genes in flowering remains unresolved, especially under short-term cold conditions. In the present study, we isolated BcMAF1, a Pak-choi (Brassica rapa ssp. Chinensis) MADS AFFECTING FLOWERING (MAF) , as a floral repressor and functi…	the regulation mechanism of MADS-box genes in flowering remains unresolved, especially under short-term cold conditions . in the present study, we isolated italic>BcMAF1, a Pak-choi, as a floral repressor .	Front Plant Sci	9		290	1664-462X (Print)	10.3389/fpls.2018.00290	https://www.ncbi.nlm.nih.gov/pubmed/29559991
Huang, F. | Xu, G. | Chi, Y. | Liu, H. | Xue, Q. | Zhao, T. | Gai, J. | Yu, D.	National key laboratory of crop genetics and germplasm enhancement, National Center for Soybean Improvement, Nanjing Agricultural University, Nanjing 210095, China. dyyu@njau.edu.cn.	A soybean MADS-box protein modulates floral organ numbers, petal identity and sterility	A soybean MADS-box protein modulates floral organ numbers, petal identity and sterility	2014	Cell Nucleus/metabolism	BACKGROUND: The MADS-box transcription factors play fundamental roles in reproductive developmental control. Although the roles of many plant MADS-box proteins have been extensively studied, there are almost no functional studies of them in soybean, an important protein and oil crop in the world. In addition, the MADS-box protein orthologs may have species-specific functions. Controlling male fer…	the roles of many plant MADS-box proteins have been extensively studied . there are almost no functional studies of them in soybean, an important protein and oil crop . controlling male fertility is an important goal in plant hybrid breeding . the morphological structure of soybean flowers prevents cross-pollination .	BMC Plant Biol	14		89	1471-2229 (Electronic)	10.1186/1471-2229-14-89	https://www.ncbi.nlm.nih.gov/pubmed/24693922
Huang, F. | Zhang, Y. | Hou, X.	State Key Laboratory of Crop Genetics and Germplasm Enhancement/Key Laboratory of Biology and Germplasm Enhancement of Horticultural Crops in East China, Ministry of Agriculture, College of Horticulture, Nanjing Agricultural University, Nanjing 210095, China.	BcAP3, a MADS box gene, controls stamen development and male sterility in Pak-choi (Brassica rapa ssp. chinensis)	BcAP3, a MADS box gene, controls stamen development and male sterility in Pak-choi (Brassica rapa ssp. chinensis)	2020	Amino Acid Sequence	Stamen development is an important developmental process controlled by multiple internal and external factors. Developmental abnormalities of stamens can disrupt the structure and function of anthers, and then result in male sterility. As well known, APETELA 3 (AP3) has a clear function in regulating stamen development, which may impact in male sterility. However, the mechanisms of stamen develop…	the mechanisms of stamen development and male sterility controlled by AP3 are still not clear . phylogenetic analysis indicated that BcAP3 was highly similar to AtAP3 . overexpression of ap3 in Arabidopsis resulted in developmental abnormalities of anther wall .	Gene	747		144698	1879-0038 (Electronic)	10.1016/j.gene.2020.144698	https://www.ncbi.nlm.nih.gov/pubmed/32325091
Huang, H. | Tudor, M. | Weiss, C. A. | Hu, Y. | Ma, H.	Cold Spring Harbor Laboratory, NY 11724, USA.	The Arabidopsis MADS-box gene AGL3 is widely expressed and encodes a sequence-specific DNA-binding protein	The Arabidopsis MADS-box gene AGL3 is widely expressed and encodes a sequence-specific DNA-binding protein	1995	Amino Acid Sequence	The Arabidopsis AGL3 gene was previously identified on the basis of sequence similarity to the floral homeotic gene AGAMOUS (AG) , which encodes a protein with a conserved MADS domain that is also found in human and yeast transcription factors (SRF and MCM1, respectively) . Analysis of newly isolated full-length cDNA clones as well as genomic clones indicates that AGL3 is indeed a MADS-box gene w…	the arabidopsis AGL3 gene was previously identified on the basis of sequence similarity . it is a protein with a conserved MADS domain that is also found in human and yeast transcription factors . the gene is expressed in all above-ground vegetative organs, as well as in flowers, but not in roots .	Plant Mol Biol	28	3	549-67	0167-4412 (Print)	10.1007/BF00020401	https://www.ncbi.nlm.nih.gov/pubmed/7632923
Huang, N. C. | Tien, H. C. | Yu, T. S.	Institute of Plant and Microbial Biology, Academia Sinica, Taipei, 11529, Taiwan.	Arabidopsis leaf-expressed AGAMOUS-LIKE 24 mRNA systemically specifies floral meristem differentiation	Arabidopsis leaf-expressed AGAMOUS-LIKE 24 mRNA systemically specifies floral meristem differentiation	2024	*Arabidopsis/metabolism	Plants can record external stimuli in mobile mRNAs and systemically deliver them to distal tissues to adjust development. Despite the identification of thousands of mobile mRNAs, the functional relevance of mobile mRNAs remains limited. Many mobile mRNAs are synthesized in the source cells that perceive environmental stimuli, but specifically exert their functions upon transportation to the recip…	mobile mRNAs are synthesized in the source cells that perceive environmental stimuli . how plants avoid ectopic functions to achieve tissue specificity remains to be elucidated .	New Phytol	241	1	504-515	1469-8137 (Electronic)	10.1111/nph.19293	https://www.ncbi.nlm.nih.gov/pubmed/37766487
Huang, Q. | Li, W. | Fan, R. | Chang, Y.	Laboratory of Plant Research, College of Life sciences, Northeast Agricultural University, Harbin, Heilongjiang Province, P. R. China ; Institute of Natural Resources and Ecology, Heilongjiang Academy of Science, Harbin, Heilongjiang Province, P. R. China.	New MADS-box gene in fern: cloning and expression analysis of DfMADS1 from Dryopteris fragrans	New MADS-box gene in fern: cloning and expression analysis of DfMADS1 from Dryopteris fragrans	2014	Amino Acid Sequence	MADS genes encode a family of transcription factors, some of which control the identities of floral organs in flowering plants. Most of the MADS-box genes in fern have been cloned and analyzed in model plants, such as Ceratopteris richardii and Ceratopteris pteridoides. In this study, a new MADS-box gene, DfMADS1 (GU385475) , was cloned from Dryopteris fragrans (L.) Schott to better understand th…	a new MADS-box gene was cloned from Dryopteris fragrans (L.) Schott . the gene was predicted to contain a typical MIKC-type domain structure . phylogenetic analysis revealed that DfMADS1 belongs to the CRM1-like subfamily .	PLoS One	9	1	e86349	1932-6203 (Electronic)	10.1371/journal.pone.0086349	https://www.ncbi.nlm.nih.gov/pubmed/24466046
Hughes, P. W.	Department of Ecology,Environment, and Plant SciencesStockholm UniversityStockholm, Sweden william.hughes@su.se.	Fine Tuning Floral Morphology: MADS-Box Protein Complex Formation in Maize	Fine Tuning Floral Morphology: MADS-Box Protein Complex Formation in Maize	2020	Dimerization	Plant floral organ development is orchestrated by master regulatory genes that control the differentiation of meristem tissue. According to the ABC (DE) model of flower development (Bowman et al., 1989; nicely summarized by Irish, 2017) , different floral organs form in concentric whorls (verticils) in response to the expression of different classes of homeotic genes. As per this model, A- and E-…	[Abstract as it is]	Plant Cell	32	11	3376-3377	1532-298X (Electronic)	10.1105/tpc.20.00818	https://www.ncbi.nlm.nih.gov/pubmed/33004615
Huijser, P. | Klein, J. | Lonnig, W. E. | Meijer, H. | Saedler, H. | Sommer, H.	Max-Planck-Institut fur Zuchtungsforschung, Koln, FRG.	Bracteomania, an inflorescence anomaly, is caused by the loss of function of the MADS-box gene squamosa in Antirrhinum majus	Bracteomania, an inflorescence anomaly, is caused by the loss of function of the MADS-box gene squamosa in Antirrhinum majus	1992	Alleles	Anomalous flowering of the Antirrhinum majus mutant squamosa (squa) is characterized by excessive formation of bracts and the production of relatively few and often malformed or incomplete flowers. To study the function of squamosa in the commitment of an inflorescence lateral meristem to floral development, the gene was cloned and its genomic structure, a well as that of four mutant alleles, was…	antirrhinum majus mutant squamosa (squa) is a member of a family of transcription factors . low transcriptional activity of the gene is detectable in bracts and in the leaves below . high transcript levels are seen in the inflorescence lateral meristems as soon as they are formed .	EMBO J	11	4	1239-49	0261-4189 (Print)	10.1002/j.1460-2075.1992.tb05168.x	https://www.ncbi.nlm.nih.gov/pubmed/1563342
Immink, R. G. | Gadella, T. W., Jr. | Ferrario, S. | Busscher, M. | Angenent, G. C.	Plant Research International, P.O. Box 16, 6700 AA Wageningen, The Netherlands.	Analysis of MADS box protein-protein interactions in living plant cells	Analysis of MADS box protein-protein interactions in living plant cells	2002	Active Transport, Cell Nucleus	Over the last decade, the yeast two-hybrid system has become the tool to use for the identification of protein-protein interactions and recently, even complete interactomes were elucidated by this method. Nevertheless, it is an artificial system that is sensitive to errors resulting in the identification of false-positive and false-negative interactions. In this study, plant MADS box transcriptio…	the yeast two-hybrid system has become the tool to use for the identification of proteinÐprotein interactions . however, it is an artificial system that is sensitive to errors resulting in false-positive and false-negative interactions. the role of dimerization in translocation of MADS box protein dimers is demonstrated.	Proc Natl Acad Sci U S A	99	4	2416-21	0027-8424 (Print)	10.1073/pnas.042677699	https://www.ncbi.nlm.nih.gov/pubmed/11854533
Immink, R. G. | Hannapel, D. J. | Ferrario, S. | Busscher, M. | Franken, J. | Lookeren Campagne, M. M. | Angenent, G. C.	Department of Developmental Biology, DLO-Centre for Plant Breeding and Reproduction Research (CPRO-DLO) , PO Box 16, The Netherlands.	A petunia MADS box gene involved in the transition from vegetative to reproductive development	A petunia MADS box gene involved in the transition from vegetative to reproductive development	1999	Amino Acid Sequence	We have identified a novel petunia MADS box gene, PETUNIA FLOWERING GENE (PFG) , which is involved in the transition from vegetative to reproductive development. PFG is expressed in the entire plant except stamens, roots and seedlings. Highest expression levels of PFG are found in vegetative and inflorescence meristems. Inhibition of PFG expression in transgenic plants, using a cosuppression stra…	high expression levels of petunia flowering gene (PFG) are found in vegetative and inflorescence meristems . pfg cosuppression mutants are blocked in the formation of flowers and maintain vegetative growth . this suggests that PFG is also required to maintain the reproductive identity after this transition .	Development	126	22	5117-26	0950-1991 (Print)	10.1242/dev.126.22.5117	https://www.ncbi.nlm.nih.gov/pubmed/10529428
Immink, R. G. | Tonaco, I. A. | de Folter, S. | Shchennikova, A. | van Dijk, A. D. | Busscher-Lange, J. | Borst, J. W. | Angenent, G. C.	Plant Research International, Bioscience, Droevendaalsesteeg 1, Wageningen, the Netherlands. richard.immink@wur.nl	SEPALLATA3: the 'glue' for MADS box transcription factor complex formation	SEPALLATA3: the 'glue' for MADS box transcription factor complex formation	2009	Arabidopsis	BACKGROUND: Plant MADS box proteins play important roles in a plethora of developmental processes. In order to regulate specific sets of target genes, MADS box proteins dimerize and are thought to assemble into multimeric complexes. In this study a large-scale yeast three-hybrid screen is utilized to provide insight into the higher-order complex formation capacity of the Arabidopsis MADS box fami…	plant MADS box proteins dimerize and are thought to assemble into multimeric complexes . this study provides insight into the higher-order complex formation capacity of the family . SEPALLATA3 (SEP3) has been shown to mediate complex formation .	Genome Biol	10	2	R24	1474-760X (Electronic)	10.1186/gb-2009-10-2-r24	https://www.ncbi.nlm.nih.gov/pubmed/19243611
Imran, M. | Liu, Y. | Shafiq, S. | Abbas, F. | Ilahi, S. | Rehman, N. | Ahmar, S. | Fiaz, S. | Baran, N. | Pan, S. | Mo, Z. | Tang, X.	Department of Crop Science and Technology, College of Agriculture, South China Agricultural University, Guangzhou, People's Republic of China.	Transcriptional cascades in the regulation of 2-AP biosynthesis under Zn supply in fragrant rice	Transcriptional cascades in the regulation of 2-AP biosynthesis under Zn supply in fragrant rice	2022	Gene Expression Regulation, Plant	Transcription factors (TFs) regulate gene expression to control certain genetic programs, such as growth and development, phytohormone regulation, and environmental stresses. 2-acetyl-1-pyrroline (2-AP) is the key element involved in aroma biosynthesis pathway, and the application of micronutrients can increase the 2-AP levels. However, little is known about the micronutrient-induced TFs involved…	678 TFs were identified and grouped into 26 TF families . members of WRKY, bHLH, MYB, ERF, HSF, MADS-box, NFY, and AP2 were significantly upregulated .	Physiol Plant	174	3	e13721	1399-3054 (Electronic)	10.1111/ppl.13721	https://www.ncbi.nlm.nih.gov/pubmed/35598224
Irfan, M. | Ghosh, S. | Meli, V. S. | Kumar, A. | Kumar, V. | Chakraborty, N. | Chakraborty, S. | Datta, A.	National Institute of Plant Genome Research New Delhi, India.	Fruit Ripening Regulation of alpha-Mannosidase Expression by the MADS Box Transcription Factor RIPENING INHIBITOR and Ethylene	Fruit Ripening Regulation of alpha-Mannosidase Expression by the MADS Box Transcription Factor RIPENING INHIBITOR and Ethylene	2016	Rin	alpha-Mannosidase (alpha-Man) , a fruit ripening-specific N-glycan processing enzyme, is involved in ripening-associated fruit softening process. However, the regulation of fruit-ripening specific expression of alpha-Man is not well understood. We have identified and functionally characterized the promoter of tomato (Solanum lycopersicum) alpha-Man to provide molecular insights into its transcrip…	p>-Man/italic> is a fruit ripening-associated fruit softening enzyme . but the regulation of fruit-ripened specific expression of italic/-Man is not well understood . a promoter fragment (567 bp upstream of translational start site) that contained three CArG boxes (binding sites for RIN) was sufficient .	Front Plant Sci	7		10	1664-462X (Print)	10.3389/fpls.2016.00010	https://www.ncbi.nlm.nih.gov/pubmed/26834776
Ishikawa, R. | Ohnishi, T. | Kinoshita, Y. | Eiguchi, M. | Kurata, N. | Kinoshita, T.	Plant Reproductive Genetics, GCOE Research Group, Graduate School of Biological Science, Nara Institute of Science and Technology, Nara 630-0192, Japan.	Rice interspecies hybrids show precocious or delayed developmental transitions in the endosperm without change to the rate of syncytial nuclear division	Rice interspecies hybrids show precocious or delayed developmental transitions in the endosperm without change to the rate of syncytial nuclear division	2011	*Cell Nucleus Division	In angiosperms, interspecific crosses often display hybrid incompatibilities that are manifested as under-proliferation or over-proliferation of endosperm. Recent analyses using crosses between Arabidopsis thaliana and its related species with different ploidy levels have shown that interspecific hybridization causes delayed developmental transition and increased mitotic activity in the endosperm…	interspecific hybridization causes delayed developmental transition and increased mitotic activity in the endosperm . rate of syncytial mitotic nuclear divisions was not significantly affected . results suggest interspecies hybridization barriers are mediated by delayed or delayed developmental alterations .	Plant J	65	5	798-806	1365-313X (Electronic)	10.1111/j.1365-313X.2010.04466.x	https://www.ncbi.nlm.nih.gov/pubmed/21251103
Ito, Yasuhiro		Regulation of Tomato Fruit Ripening by MADS-Box Transcription Factors	Regulation of Tomato Fruit Ripening by MADS-Box Transcription Factors	2016		The regulation of ripening in fleshy fruits directly affects the quality and shelf life of such fruit, and extensive research has aimed to understand this regulation based on its agronomic importance. The identification of the key regulatory gene RIN in tomato has opened new horizons in our understanding of fruit ripening. RIN encodes a MADS-box transcription factor that functions as one of the e…	the regulation of ripening in fleshy fruits directly affects the quality and shelf life of fruit . molecular characterization of the gene RIN has helped to elucidate the regulation . RIN encodes a MADS-box transcription factor that functions as one of the earliest acting factors .	Japan Agricultural Research Quarterly: JARQ	50	1	33-38	0021-3551	10.6090/jarq.50.33
Ito, Y. | Nakamura, N. | Kotake-Nara, E.	Food Research Institute, National Agriculture and Food Research Organization (NARO) , Tsukuba, Ibaraki, Japan.	Semi-dominant effects of a novel ripening inhibitor (rin) locus allele on tomato fruit ripening	Semi-dominant effects of a novel ripening inhibitor (rin) locus allele on tomato fruit ripening	2021	Ethylenes/*metabolism	The tomato (Solanum lycopersicum) ripening inhibitor (rin) mutation completely represses fruit ripening, as rin fruits fail to express ripening-associated genes and remain green and firm. Moreover, heterozygous rin fruits (rin/+) ripen normally but have extended shelf life, an important consideration for this perishable fruit crop; therefore, heterozygous rin has been widely used to breed varieti…	the tomato (Solanum lycopersicum) ripening inhibitor (rin) mutation completely represses fruit ripeness . rin/+ fruits re-ripen normally but have extended shelf life, an important consideration for perishable fruit crop .	PLoS One	16	4	e0249575	1932-6203 (Electronic)	10.1371/journal.pone.0249575	https://www.ncbi.nlm.nih.gov/pubmed/33886595
Iwabuchi, N. | Kitazawa, Y. | Maejima, K. | Koinuma, H. | Miyazaki, A. | Matsumoto, O. | Suzuki, T. | Nijo, T. | Oshima, K. | Namba, S. | Yamaji, Y.	Department of Agricultural and Environmental Biology, Graduate School of Agricultural and Life Sciences, The University of Tokyo, Tokyo, Japan.	Functional variation in phyllogen, a phyllody-inducing phytoplasma effector family, attributable to a single amino acid polymorphism	Functional variation in phyllogen, a phyllody-inducing phytoplasma effector family, attributable to a single amino acid polymorphism	2020	Amino Acids/genetics	Flower malformation represented by phyllody is a common symptom of phytoplasma infection induced by a novel family of phytoplasma effectors called phyllogens. Despite the accumulation of functional and structural phyllogen information, the molecular mechanisms of phyllody have not yet been integrated with their evolutionary aspects due to the limited data on their homologs across diverse phytopla…	phyllody is a common symptom of phytoplasma infection induced by a novel family of effectors . the molecular mechanisms of the disease have not yet been integrated with their evolutionary aspects . four of the 25 species identified were not yet identified .	Mol Plant Pathol	21	10	1322-1336	1364-3703 (Electronic)	10.1111/mpp.12981	https://www.ncbi.nlm.nih.gov/pubmed/32813310
Jaakola, L. | Poole, M. | Jones, M. O. | Kamarainen-Karppinen, T. | Koskimaki, J. J. | Hohtola, A. | Haggman, H. | Fraser, P. D. | Manning, K. | King, G. J. | Thomson, H. | Seymour, G. B.	Department of Biology University of Oulu, FIN-90014 Oulu, Finland.	A SQUAMOSA MADS box gene involved in the regulation of anthocyanin accumulation in bilberry fruits	A SQUAMOSA MADS box gene involved in the regulation of anthocyanin accumulation in bilberry fruits	2010	Anthocyanins/*biosynthesis	Anthocyanins are important health-promoting phytochemicals that are abundant in many fleshy fruits. Bilberry (Vaccinium myrtillus) is one of the best sources of these compounds. Here, we report on the expression pattern and functional analysis of a SQUAMOSA-class MADS box transcription factor, VmTDR4, associated with anthocyanin biosynthesis in bilberry. Levels of VmTDR4 expression were spatially…	anthocyanins are important health-promoting phytochemicals that are abundant in many fleshy fruits . bilberry is one of the best sources of these compounds . levels ofVmTDR4expression were spatially and temporally linked with color development .	Plant Physiol	153	4	1619-29	1532-2548 (Electronic)	10.1104/pp.110.158279	https://www.ncbi.nlm.nih.gov/pubmed/20566708
Jack, T. | Brockman, L. L. | Meyerowitz, E. M.	Division of Biology, California Institute of Technology, Pasadena 91125.	The homeotic gene APETALA3 of Arabidopsis thaliana encodes a MADS box and is expressed in petals and stamens	The homeotic gene APETALA3 of Arabidopsis thaliana encodes a MADS box and is expressed in petals and stamens	1992	Alleles	Mutations in the APETALA3 (AP3) gene of A. thaliana result in homeotic transformations of petals to sepals and stamens to carpels. We have cloned the AP3 gene from Arabidopsis based on its homology to the homeotic flower gene deficiens (DEFA) from the distantly related plant Antirrhinum majus. The sequence of four ap3 mutant alleles and genetic mapping analysis prove that the DEFA homolog is AP3.…	cloned i>AP3/i> gene from A. thaliana based on its homology to the homeotic flower gene . like several other plant homeotic genes, the gene contains a MADS box and likely acts as a transcription factor .	Cell	68	4	683-97	0092-8674 (Print)	10.1016/0092-8674(92)90144-2	https://www.ncbi.nlm.nih.gov/pubmed/1346756
Jager, M. | Hassanin, A. | Manuel, M. | Le Guyader, H. | Deutsch, J.	Service de Biosystematique, Universite P et M Curie, Paris, France.	MADS-box genes in Ginkgo biloba and the evolution of the AGAMOUS family	MADS-box genes in Ginkgo biloba and the evolution of the AGAMOUS family	2003	Amino Acid Sequence	MADS-box proteins are a large family of transcription factors. In plants, many genes belonging to this family are involved in the homeosis of the floral system. Up to now, they have mainly been studied in angiosperms, especially in the model species Arabidopsis thaliana and Antirrhinum majus. We undertook a study of MADS-box genes in Ginkgo biloba, the unique extant representative of a whole bran…	many genes belonging to this family are involved in the homeosis of the floral system . phylogenetic analyses revealed that one of these genes is an orthologue of theAGAMOUSgene ofA. thaliana .	Mol Biol Evol	20	5	842-54	0737-4038 (Print)	10.1093/molbev/msg089	https://www.ncbi.nlm.nih.gov/pubmed/12679535
Jaligot, E. | Hooi, W. Y. | Debladis, E. | Richaud, F. | Beule, T. | Collin, M. | Agbessi, M. D. | Sabot, F. | Garsmeur, O. | D'Hont, A. | Alwee, S. S. | Rival, A.	UMR DIADE, CIRAD, Montpellier, France.	DNA methylation and expression of the EgDEF1 gene and neighboring retrotransposons in mantled somaclonal variants of oil_palm	DNA methylation and expression of the EgDEF1 gene and neighboring retrotransposons in mantled somaclonal variants of oil_palm	2014	Amino Acid Sequence	The mantled floral phenotype of oil_palm (Elaeis guineensis) affects somatic embryogenesis-derived individuals and is morphologically similar to mutants defective in the B-class MADS-box genes. This somaclonal variation has been previously demonstrated to be associated to a significant deficit in genome-wide DNA methylation. In order to elucidate the possible role of DNA methylation in the transc…	the mantled floral phenotype of oil palm affects somatic embryogenesis-derived individuals . it is morphologically similar to mutants defective in the B-class MADS-box genes . elucidates possible role of DNA methylation in transcriptional regulation of EgDEF1 .	PLoS One	9	3	e91896	1932-6203 (Electronic)	10.1371/journal.pone.0091896	https://www.ncbi.nlm.nih.gov/pubmed/24638102
Jamaluddin, N. D. | Mohd Noor, N. | Goh, H. H.	Institute of Systems Biology, Universiti Kebangsaan Malaysia, UKM, 43600 Bangi, Selangor Darul Ehsan Malaysia. GRID: grid.412113.4	Genome-wide transcriptome profiling of Carica papaya L. embryogenic callus	Genome-wide transcriptome profiling of Carica papaya L. embryogenic callus	2017	3' mRNA sequencing	Genome-wide transcriptome profiling is a powerful tool to study global gene expression patterns in plant development. We report the first transcriptome profile analysis of papaya embryogenic callus to improve our understanding on genes associated with somatic embryogenesis. By using 3' mRNA-sequencing, we generated 6,190,687 processed reads and 47.0% were aligned to papaya genome reference, in wh…	we report the first transcriptome profile analysis of papaya embryogenic callus . top 10% of genes with high transcript abundance were enriched in biological processes . genes related to secondary metabolite biosynthesis were highly expressed . study provides important information into early biological processes during embryogenesis .	Physiol Mol Biol Plants	23	2	357-368	0971-5894 (Print)	10.1007/s12298-017-0429-8	https://www.ncbi.nlm.nih.gov/pubmed/28461724
Jang, S. | An, K. | Lee, S. | An, G.	Laboratory of Plant Functional Genomics, Division of Molecular and Life Sciences, Pohang University of Science and Technology, Pohang, 790-784 Korea.	Characterization of tobacco (Nicotiana tabacum) MADS-box genes involved in floral initiation	Characterization of tobacco (Nicotiana tabacum) MADS-box genes involved in floral initiation	2002	Amino Acid Sequence	MADS-box genes encode regulatory factors that are involved at various stages in plant development. These genes function not only during early floral meristem identity, but also when the fate of floral organ primordia is determined in a later step. Here, we screened a floral bud cDNA library to isolate a tobacco (Nicotiana tabacum) MADS-box gene, NtMADS4, using the rice MADS-box gene, OsMADS1, as …	the fate of floral organ primordia is determined in a later step . we screened a floral bud cDNA library to isolate a tobacco MADS-box gene . ectopic expression ofNtMADS4 caused phenotypes of extremely early flowering .	Plant Cell Physiol	43	2	230-8	0032-0781 (Print)	10.1093/pcp/pcf015	https://www.ncbi.nlm.nih.gov/pubmed/11867703
Jensen, E. | Shafiei, R. | Ma, X. F. | Serba, D. D. | Smith, D. P. | Slavov, G. T. | Robson, P. | Farrar, K. | Thomas Jones, S. | Swaller, T. | Flavell, R. | Clifton-Brown, J. | Saha, M. C. | Donnison, I.	Institute of Biological, Environmental and Rural Sciences Aberystwyth University Aberystwyth UK.	Linkage mapping evidence for a syntenic QTL associated with flowering time in perennial C (4) rhizomatous grasses Miscanthus and switchgrass	Linkage mapping evidence for a syntenic QTL associated with flowering time in perennial C (4) rhizomatous grasses Miscanthus and switchgrass	2021	Panicum virgatum	Flowering in perennial species is directed via complex signalling pathways that adjust to developmental regulations and environmental cues. Synchronized flowering in certain environments is a prerequisite to commercial seed production, and so the elucidation of the genetic architecture of flowering time in Miscanthus and switchgrass could aid breeding in these underdeveloped species. In this cont…	flowering in perennial species is directed via complex signalling pathways . elucidation of the genetic architecture of flowering time could aid breeding . most significant miscanthus and switchgrass QTL proved to be syntenic .	Glob Change Biol Bioenergy	13	1	98-111	1757-1693 (Print)	10.1111/gcbb.12755	https://www.ncbi.nlm.nih.gov/pubmed/33381230
Jeon, J. S. | Jang, S. | Lee, S. | Nam, J. | Kim, C. | Lee, S. H. | Chung, Y. Y. | Kim, S. R. | Lee, Y. H. | Cho, Y. G. | An, G.	National Research Laboratory of Plant Functional Genomics, Division of Molecular Life Sciences, Pohang University of Science and Technology (POSTECH) , Pohang 790-784, Republic of Korea.	leafy hull sterile1 is a homeotic mutation in a rice MADS box gene affecting rice flower development	leafy hull sterile1 is a homeotic mutation in a rice MADS box gene affecting rice flower development	2000	Amino Acid Sequence	Rice contains several MADS box genes. It has been demonstrated previously that one of these genes, OsMADS1 (for Oryza sativa MADS box gene1) , is expressed preferentially in flowers and causes early flowering when ectopically expressed in tobacco (Nicotiana tabacum) plants. In this study, we demonstrated that ectopic expression of OsMADS1 in rice also results in early flowering. To further invest…	rice contains several MADS box genes . ectopic expression of OsMADS1 in rice also results in early flowering . no visible alteration in transgenic plants during vegetative stage .	Plant Cell	12	6	871-84	1040-4651 (Print)	10.1105/tpc.12.6.871	https://www.ncbi.nlm.nih.gov/pubmed/10852934
Jetha, K. | Theissen, G. | Melzer, R.	Department of Genetics, Friedrich Schiller University Jena, Philosophenweg 12, D-07743 Jena, Germany.	Arabidopsis SEPALLATA proteins differ in cooperative DNA-binding during the formation of floral quartet-like complexes	Arabidopsis SEPALLATA proteins differ in cooperative DNA-binding during the formation of floral quartet-like complexes	2014	Arabidopsis/genetics	The SEPALLATA (SEP) genes of Arabidopsis thaliana encode MADS-domain transcription factors that specify the identity of all floral organs. The four Arabidopsis SEP genes function in a largely yet not completely redundant manner. Here, we analysed interactions of the SEP proteins with DNA. All of the proteins were capable of forming tetrameric quartet-like complexes on DNA fragments carrying two s…	the fourArabidopsis SEPgenes function in a largely yet not completely redundant manner . all of the proteins were capable of forming tetrameric quartet-like complexes on DNA fragments .	Nucleic Acids Res	42	17	10927-42	1362-4962 (Electronic)	10.1093/nar/gku755	https://www.ncbi.nlm.nih.gov/pubmed/25183521
Ji, D. | Cui, X. | Qin, G. | Chen, T. | Tian, S.	Key Laboratory of Plant Resources, Institute of Botany, Innovative Academy of Seed Design, Chinese Academy of Sciences, Beijing 100093, China.	SlFERL Interacts with S-Adenosylmethionine Synthetase to Regulate Fruit Ripening	SlFERL Interacts with S-Adenosylmethionine Synthetase to Regulate Fruit Ripening	2020	Fruit/*genetics/*growth & development/metabolism	Fruit ripening is a complex and genetically programmed process modulated by transcription factors, hormones, and other regulators. However, the mechanism underlying the regulatory loop involving the membrane-protein targets of RIPENING-INHIBITOR (RIN) remains poorly understood. To unravel the function of tomato ( Solanum lycopersicum) FERONIA Like (SlFERL) , a putative MADS-box transcription fact…	fruit ripening is a complex and genetically programmed process modulated by transcription factors, hormones, and other regulators . the mechanism underlying the regulatory loop involving the membrane-protein targets of RIPENING-INHIBITOR (RIN) remains poorly understood .	Plant Physiol	184	4	2168-2181	1532-2548 (Electronic)	10.1104/pp.20.01203	https://www.ncbi.nlm.nih.gov/pubmed/32999005
Jia, J. | Zhao, P. | Cheng, L. | Yuan, G. | Yang, W. | Liu, S. | Chen, S. | Qi, D. | Liu, G. | Li, X.	Key Laboratory of Plant Resources, Institute of Botany, The Chinese Academy of Sciences, Beijing, China.	MADS-box family genes in sheepgrass and their involvement in abiotic stress responses	MADS-box family genes in sheepgrass and their involvement in abiotic stress responses	2018	Gene Expression Regulation, Plant/drug effects	BACKGROUND: MADS-box genes are categorized into A, B, C, D and E classes and are involved in floral organ identity and flowering. Sheepgrass (Leymus chinensis (Trin.) Tzvel) is an important perennial forage grass and adapts well to many adverse environments. However, there are few studies on the molecular mechanisms of flower development in sheepgrass, especially studies on MADS-domain proteins. …	sheepgrass is an important perennial forage grass and adapts well to many adverse environments . there are few studies on the molecular mechanisms of flower development in sheepgrass . phylogenetic analysis of the 11 genes revealed they are divided into nine subclades .	BMC Plant Biol	18	1	42	1471-2229 (Electronic)	10.1186/s12870-018-1259-8	https://www.ncbi.nlm.nih.gov/pubmed/29540194
Jiang, X. | Lubini, G. | Hernandes-Lopes, J. | Rijnsburger, K. | Veltkamp, V. | de Maagd, R. A. | Angenent, G. C. | Bemer, M.	Laboratory of Molecular Biology, Wageningen University and Research, Droevendaalsesteeg 1, 6708 PB Wageningen, The Netherlands.	FRUITFULL-like genes regulate flowering time and inflorescence architecture in tomato	FRUITFULL-like genes regulate flowering time and inflorescence architecture in tomato	2022	Flowers/genetics/metabolism	The timing of flowering and the inflorescence architecture are critical for the reproductive success of tomato (Solanum lycopersicum) , but the gene regulatory networks underlying these traits have not been fully explored. Here, we show that the tomato FRUITFULL-like (FUL-like) genes FUL2 and MADS-BOX PROTEIN 20 (MBP20) promote the vegetative-to-reproductive transition and repress inflorescence b…	the timing of flowering and the inflorescence architecture are critical for the reproductive success of tomato . the gene regulatory networks underlying these traits have not been fully explored .	Plant Cell	34	3	1002-1019	1532-298X (Electronic)	10.1093/plcell/koab298	https://www.ncbi.nlm.nih.gov/pubmed/34893888
Jiang, Y. | Peng, J. | Zhang, Z. | Lin, S. | Lin, S. | Yang, X.	State Key Laboratory for Conservation and Utilization of Subtropical Agro-bioresources, College of Horticulture, South China Agricultural University, Wushan Road 483, Tianhe District, Guangzhou 510642, China.	The Role of EjSVPs in Flower Initiation in Eriobotrya japonica	The Role of EjSVPs in Flower Initiation in Eriobotrya japonica	2019	Cloning, Molecular	Flowering plants have evolved different flowering habits to sustain long-term reproduction. Most woody trees experience dormancy and then bloom in the warm spring, but loquat blooms in the cold autumn and winter. To explore its mechanism of flowering regulation, we cloned two SHORT VEGETATIVE PHASE (SVP) homologous genes from 'Jiefanzhong' loquat (Eriobotrya japonica Lindl.) , namely, EjSVP1 and …	loquat flowers in the cold autumn and winter . most woody trees experience dormancy and then bloom in the warm spring . overexpression of EjSVP2 affected the formation of flower organs .	Int J Mol Sci	20	23		1422-0067 (Electronic)	10.3390/ijms20235933	https://www.ncbi.nlm.nih.gov/pubmed/31779080
Jiang, Y. | Peng, J. | Zhu, Y. | Su, W. | Zhang, L. | Jing, Y. | Lin, S. | Gao, Y.	State Key Laboratory for Conservation and Utilization of Subtropical Agro-Bioresources, College of Horticulture, South China Agricultural University, Guangzhou, China.	The Role of EjSOC1s in Flower Initiation in Eriobotrya japonica	The Role of EjSOC1s in Flower Initiation in Eriobotrya japonica	2019	EjAP1	The MADS-box transcription factor SUPPRESSOR OF OVEREXPRESSION OF CONSTANS1 (SOC1) integrates environmental and endogenous signals to promote flowering in Arabidopsis. However, the role of SOC1 homologs in regulating flowering time in fruit trees remains unclear. To better understand the molecular mechanism of flowering regulation in loquat (Eriobotrya japonica Lindl.) , two SOC1 homologs (EjSOC1…	the role of italic>SOC1/italic] homologs in regulating flowering time in fruit trees remains unclear . cultivated loquat flower bud differentiation in southern china begins in late June to early July . the results provide new insight into the artificial regulation of flower initiation .	Front Plant Sci	10		253	1664-462X (Print)	10.3389/fpls.2019.00253	https://www.ncbi.nlm.nih.gov/pubmed/30930912
Jimenez, S. | Lawton-Rauh, A. L. | Reighard, G. L. | Abbott, A. G. | Bielenberg, D. G.	Department of Horticulture, Clemson University, Clemson, SC 29634-0319, USA. sergij@clemson.edu	Phylogenetic analysis and molecular evolution of the dormancy associated MADS-box genes from peach (Prunus persica)	Phylogenetic analysis and molecular evolution of the dormancy associated MADS-box genes from peach (Prunus persica)	2009	Amino Acid Sequence	BACKGROUND: Dormancy associated MADS-box (DAM) genes are candidates for the regulation of growth cessation and terminal bud formation in peach (Prunus persica) . These genes are not expressed in the peach (Prunus persica) mutant evergrowing, which fails to cease growth and enter dormancy under dormancy-inducing conditions. We analyzed the phylogenetic relationships among and the rates and pattern…	peach mutant evergrowing fails to cease growth and enter dormancy . phylogenetic analyses suggest peach expanded through serial tandem gene duplication . evidence of strong purifying selection acting to constrain functional divergence .	BMC Plant Biol	9		81	1471-2229 (Electronic)	10.1186/1471-2229-9-81	https://www.ncbi.nlm.nih.gov/pubmed/19558704
Jin, S. | Kim, S. Y. | Susila, H. | Nasim, Z. | Youn, G. | Ahn, J. H.	Department of Life Sciences, Korea University, Seoul 02841, Republic of Korea.	FLOWERING LOCUS M isoforms differentially affect the subcellular localization and stability of SHORT VEGETATIVE PHASE to regulate temperature-responsive flowering in Arabidopsis	FLOWERING LOCUS M isoforms differentially affect the subcellular localization and stability of SHORT VEGETATIVE PHASE to regulate temperature-responsive flowering in Arabidopsis	2022	*Arabidopsis/metabolism	Temperature is an important environmental cue that affects flowering time in plants. The MADS-box transcription factor FLOWERING LOCUS M (FLM) forms a heterodimeric complex with SHORT VEGETATIVE PHASE (SVP) and controls ambient temperature-responsive flowering in Arabidopsis. FLM-beta and FLM-delta, two major splice variants produced from the FLM locus, exert opposite effects on flowering, but th…	molecular mechanism by which FLM isoforms and SVP affect temperature-responsive flowering remains poorly understood . nuclear localization of SVP decreases as temperature increases . sVP preferentially binds to FLM- at low temperature in tobacco leaf cells .	Mol Plant	15	11	1696-1709	1752-9867 (Electronic)	10.1016/j.molp.2022.08.007	https://www.ncbi.nlm.nih.gov/pubmed/36016495
Joshi, S. | Awan, H. | Paul, P. | Tian, R. | Perry, S. E.	Kentucky tobacco (Nicotiana tabacum) Research and Development Center (KTRDC) , University of Kentucky, Lexington, KY 40546, USA.	Revisiting AGAMOUS-LIKE15, a Key Somatic Embryogenesis Regulator, Using Next Generation Sequencing Analysis in Arabidopsis	Revisiting AGAMOUS-LIKE15, a Key Somatic Embryogenesis Regulator, Using Next Generation Sequencing Analysis in Arabidopsis	2022	*Arabidopsis/genetics/metabolism	AGAMOUS-like 15 (AGL15) is a member of the MADS-domain transcription factor (TF) family. MADS proteins are named for a conserved domain that was originally from an acronym derived from genes expressed in a variety of eukaryotes (MCM1-AGAMOUS-DEFICIENS-SERUM RESPONSE FACTOR) . In plants, this family has expanded greatly, with more than one-hundred members generally found in dicots, and the protein…	AGL15 is a member of the MADS-domain transcription factor (TF) family . it promotes an important process called plant regeneration via somatic embryogenesis . the new NGS data brought to light an interaction with brassinosteroid (BR) hormone signaling .	Int J Mol Sci	23	23		1422-0067 (Electronic)	10.3390/ijms232315082	https://www.ncbi.nlm.nih.gov/pubmed/36499403
Joshi, S. | Hill, K. | Chakrabarti, M. | Perry, S. E.	Kentucky tobacco (Nicotiana tabacum) Research and Development Center, 1401 University Dr. University of Kentucky Lexington KY USA.	Regulatory mechanisms of the LBD40 transcription factor in Arabidopsis thaliana somatic embryogenesis	Regulatory mechanisms of the LBD40 transcription factor in Arabidopsis thaliana somatic embryogenesis	2023	embryogenesis	Somatic embryogenesis (SE) is a process by which an embryo is derived from somatic tissue. Transcription factors (TFs) have been identified that control this process. One such TF that promotes SE is AGAMOUS-like 15 (AGL15) . Prior work has shown that AGL15 can both induce and repress gene expression. One way this type of dual function TF works is via protein interactions, so a yeast 2-hybrid (Y2H…	somatic embryogenesis (SE) is a process by which an embryo is derived from somatic tissue . Transcription factors (TFs) have been identified that control this process . one such TF that promotes SE is AGAMOUS-like 15 (AGL15)	Plant Direct	7	12	e547	2475-4455 (Electronic)	10.1002/pld3.547	https://www.ncbi.nlm.nih.gov/pubmed/38075399
Joshi, S. | Keller, C. | Perry, S. E.	Department of Plant and Soil Sciences, University of Kentucky, Plant Science Building, Lexington, KY 40502, USA.	The EAR Motif in the Arabidopsis MADS Transcription Factor AGAMOUS-Like 15 Is Not Necessary to Promote Somatic Embryogenesis	The EAR Motif in the Arabidopsis MADS Transcription Factor AGAMOUS-Like 15 Is Not Necessary to Promote Somatic Embryogenesis	2021	Agl15	AGAMOUS-like 15 (AGL15) is a member of the MADS domain family of transcription factors (TFs) that can directly induce and repress target gene expression, and for which promotion of somatic embryogenesis (SE) is positively correlated with accumulation. An ethylene-responsive element binding factor-associated amphiphilic repression (EAR) motif of form LxLxL within the carboxyl-terminal domain of AG…	AGL15 is a member of the MADS domain family of transcription factors (TFs) it can directly induce and repress target gene expression . promotion of somatic embryogenesis (SE) is positively correlated with accumulation .	Plants (Basel)	10	4		2223-7747 (Print)	10.3390/plants10040758	https://www.ncbi.nlm.nih.gov/pubmed/33924312
Joshi, S. | Paul, P. | Hartman, J. M. | Perry, S. E.	Department of Plant and Soil Sciences, University of Kentucky, Lexington, KY, United States.	AGL15 Promotion of Somatic Embryogenesis: Role and Molecular Mechanism	AGL15 Promotion of Somatic Embryogenesis: Role and Molecular Mechanism	2022	Arabidopsis thaliana	Plants have amazing regenerative properties with single somatic cells, or groups of cells able to give rise to fully formed plants. One means of regeneration is somatic embryogenesis, by which an embryonic structure is formed that "converts" into a plantlet. Somatic embryogenesis has been used as a model for zygotic processes that are buried within layers of maternal tissues. Understanding mechan…	somatic embryogenesis has been used as a model for zygotic processes that are buried within layers of maternal tissues . regeneration of transformed cells is needed for this applied work as well as basic research to understand gene function . here we focus on a MADS-domain transcription factor, AGAMOUS-Like15 .	Front Plant Sci	13		861556	1664-462X (Print)	10.3389/fpls.2022.861556	https://www.ncbi.nlm.nih.gov/pubmed/35419012
Kaashyap, M. | Ford, R. | Mann, A. | Varshney, R. K. | Siddique, K. H. M. | Mantri, N.	The Pangenomics Group, School of Science, RMIT University, Melbourne 3083, Australia.	Comparative Flower Transcriptome Network Analysis Reveals DEGs Involved in Chickpea Reproductive Success during Salinity	Comparative Flower Transcriptome Network Analysis Reveals DEGs Involved in Chickpea Reproductive Success during Salinity	2022	co-expression network	Salinity is increasingly becoming a significant problem for the most important yet intrinsically salt-sensitive grain legume chickpea. Chickpea is extremely sensitive to salinity during the reproductive phase. Therefore, it is essential to understand the molecular mechanisms by comparing the transcriptomic dynamics between the two contrasting genotypes in response to salt stress. Chickpea exhibit…	chickpea is extremely sensitive to salinity during the reproductive phase . RNA-Sequencing is a revolutionary tool that allows for comprehensive transcriptome profiling . genes involved in flowering time and pollen development are differentially regulated .	Plants (Basel)	11	3		2223-7747 (Print)	10.3390/plants11030434	https://www.ncbi.nlm.nih.gov/pubmed/35161414
Kagaya, H. | Ito, N. | Shibuya, T. | Komori, S. | Kato, K. | Kanayama, Y.	Graduate School of Agricultural Science, Tohoku University, Aoba-ku, Sendai 980-8572, Japan.	Characterization of FLOWERING LOCUS C Homologs in apple (Malus domesticus) as a Model for Fruit Trees	Characterization of FLOWERING LOCUS C Homologs in apple (Malus domesticus) as a Model for Fruit Trees	2020	Amino Acid Sequence	To elucidate the molecular mechanism of juvenility and annual flowering of fruit trees, FLOWERING LOCUS C (FLC) , an integrator of flowering signals, was investigated in apple (Malus domesticus) as a model. We performed sequence and expression analyses and transgenic experiments related to juvenility with annual flowering to characterize the apple (Malus domesticus) FLC homologs MdFLC. The phylog…	apple homologs of FLC could be involved in juvenility and annual flowering . phylogenetic tree analysis shows that both MdFLC1 and MdFC3 belong to same FLC group . apple seedlings can be used to analyze expression during phase transition .	Int J Mol Sci	21	12		1422-0067 (Electronic)	10.3390/ijms21124562	https://www.ncbi.nlm.nih.gov/pubmed/32604952
Kakei, Y. | Masuda, H. | Nishizawa, N. K. | Hattori, H. | Aung, M. S.	Institute of Vegetable and Floriculture Science, Research Center for Agricultural Information Technology, National Agriculture and Food Research Organization, Ibaraki, Japan.	Elucidation of Novel cis-Regulatory Elements and Promoter Structures Involved in Iron Excess Response Mechanisms in Rice Using a Bioinformatics Approach	Elucidation of Novel cis-Regulatory Elements and Promoter Structures Involved in Iron Excess Response Mechanisms in Rice Using a Bioinformatics Approach	2021	bioinformatics	Iron (Fe) excess is a major constraint on crop production in flooded acidic soils, particularly in rice cultivation. Under Fe excess, plants activate a complex mechanism and network regulating Fe exclusion by roots and isolation in various tissues. In rice, the transcription factors and cis-regulatory elements (CREs) that regulate Fe excess response mechanisms remain largely elusive. We previousl…	under Fe excess, plants activate a complex mechanism and network regulating Fe exclusion . in rice, the transcription factors that regulate Fe excess response mechanisms remain elusive . we explored novel CREs and promoter structures using bioinformatics approaches .	Front Plant Sci	12		660303	1664-462X (Print)	10.3389/fpls.2021.660303	https://www.ncbi.nlm.nih.gov/pubmed/34149757
Kane, N. A. | Danyluk, J. | Tardif, G. | Ouellet, F. | Laliberte, J. F. | Limin, A. E. | Fowler, D. B. | Sarhan, F.	Departement des Sciences Biologiques, Universite du Quebec a Montreal, Montreal, Quebec, Canada H3C 3P8.	TaVRT-2, a member of the StMADS-11 clade of flowering repressors, is regulated by vernalization and photoperiod in wheat	TaVRT-2, a member of the StMADS-11 clade of flowering repressors, is regulated by vernalization and photoperiod in wheat	2005	Amino Acid Sequence	The initiation of the reproductive phase in winter cereals is delayed during winter until favorable growth conditions resume in the spring. This delay is modulated by low temperature through the process of vernalization. The molecular and genetic bases of the interaction between environmental factors and the floral transition in these species are still unknown. However, the recent identification …	the initiation of the reproductive phase in winter cereals is delayed until favorable growth conditions resume in the spring . the molecular and genetic bases of the interaction between environmental factors and the floral transition are still unknown . here, we describe the characterization of another gene, namedTaVRT-2, possibly involved in the flowering pathway .	Plant Physiol	138	4	2354-63	0032-0889 (Print)	10.1104/pp.105.061762	https://www.ncbi.nlm.nih.gov/pubmed/16024692
Kang, M. J. | Jin, H. S. | Noh, Y. S. | Noh, B.	School of Biological Sciences, Seoul National University, Seoul, 151-747, Korea.	Repression of flowering under a noninductive photoperiod by the HDA9-AGL19-FT module in Arabidopsis	Repression of flowering under a noninductive photoperiod by the HDA9-AGL19-FT module in Arabidopsis	2015	Acetylation	Posttranslational acetylation of histones is reversibly regulated by histone deacetylases (HDACs) . Despite the evident significance of HDACs in Arabidopsis development, the biological roles and underlying molecular mechanisms of many HDACs are yet to be elucidated. By a reverse-genetic approach, we isolated an hda9 mutant and performed phenotypic analyses on it. In order to address the role of H…	posttranslational acetylation of histones is reversibly regulated by HDACs . hda9 mutation increased expression of floral integrator FLOWERING LOCUS T ( FT ) and floral activator AGAMOUS-LIKE 19 ( AGL19 ) but not at FT during active transcription . an agl19 mutation is epistatic to the mutation, masking both the early flowering	New Phytol	206	1	281-294	1469-8137 (Electronic)	10.1111/nph.13161	https://www.ncbi.nlm.nih.gov/pubmed/25406502
Kang, S. G. | Hannapel, D. J.	Iowa State University, Ames 50011, USA.	Nucleotide sequences of novel potato (Solanum tuberosum L.) MADS-box cDNAs and their expression in vegetative organs	Nucleotide sequences of novel potato (Solanum tuberosum L.) MADS-box cDNAs and their expression in vegetative organs	1995	Amino Acid Sequence	Two similar, apparently full-length potato cDNAs, POTM1-1 and POTM1-2, from an early tuber cDNA library have been identified and sequenced. These two cDNAs encode 250 identical amino acids (aa) including 56 aa of the MADS-box domain and 53 aa of the K-box domain, indicating that they may function as transcription factors. The transcripts of these cDNAs accumulate abundantly in vegetative organs, …	two similar, apparently full-length potato cDNAs, POTM1-1 and POTM1-2, have been identified and sequenced . they encode 250 identical amino acids (aa) including 56 aa of the MADS-box domain .	Gene	166	2	329-30	0378-1119 (Print)	10.1016/0378-1119(95)00593-5	https://www.ncbi.nlm.nih.gov/pubmed/8543185
Kang, S. G. | Hannapel, D. J.	Department of Horticulture, Iowa State University, Ames 50011, USA.	A novel MADS-box gene of potato (Solanum tuberosum L.) expressed during the early stages of tuberization	A novel MADS-box gene of potato (Solanum tuberosum L.) expressed during the early stages of tuberization	1996	Base Sequence	A potato MADS-box gene cDNA (POTM1-1) from an early tuber cDNA library has been isolated and characterized. The deduced amino acid sequence of POTM1-1 cDNA encodes 250 amino acids of a putative transcription factor containing a MADS-box domain and a K-box domain. These conserved domains share high homologies to those of flower-specific homeotic proteins, TM4 of tomato and AP1 of Arabidopsis, indi…	the levels of POTM1-1 transcripts were high in axillary buds, underground stolon tips, and newly formed tubers, but relatively low in mature tubers . cnn: it is possible that POTM 1-1 functions as a transcription factor that regulates plant development in a number of tissue types .	Plant Mol Biol	31	2	379-86	0167-4412 (Print)	10.1007/BF00021798	https://www.ncbi.nlm.nih.gov/pubmed/8756601
Kang, S. G. | Hannapel, D. J. | Suh, S. G.	Institute of Biotechnology, Yeungnam University, Gyeongsan 712-749, Korea. kangsg@yu.ac.kr	Potato MADS-box gene POTM1-1 transcripts are temporally and spatially distributed in floral organs and vegetative meristems	Potato MADS-box gene POTM1-1 transcripts are temporally and spatially distributed in floral organs and vegetative meristems	2003	Flowers/*chemistry	The POTM1-1 gene is abundantly expressed in both vegetative and reproductive organs of potato. We performed in situ hybridization and RNA blotting analysis to investigate the patterns of POTM1-1 gene expression in the flower development and the early tuber development. In the early flowers, POTM1-1 transcripts were accumulated abundantly in the developing reproductive organs, including the placen…	the POTM1-1 gene is abundantly expressed in both vegetative and reproductive organs of potato . the transcripts were abundant in the sepals and petals of late flowers, but were minimal in the stamens and carpel . in the vegetative organs, transcripts distributed throughout meristem domes, young leaves, and developing vascular cambium .	Mol Cells	15	1	48-54	1016-8478 (Print)	10.1016/s1016-8478(23)13706-x	https://www.ncbi.nlm.nih.gov/pubmed/12661760
Kannan, P. | Chongloi, G. L. | Majhi, B. B. | Basu, D. | Veluthambi, K. | Vijayraghavan, U.	Department of Plant Biotechnology, School of Biotechnology, Madurai Kamaraj University, Madurai, Tamil Nadu, 625021, India.	Characterization of a new rice OsMADS1 null mutant generated by homologous recombination-mediated gene targeting	Characterization of a new rice OsMADS1 null mutant generated by homologous recombination-mediated gene targeting	2021	Flowers/genetics/metabolism	A new, stable, null mutant of OsMADS1 generated by homologous recombination-based gene targeting in an indica rice confirms its regulatory role for floral meristem identity, its determinate development and floral organ differentiation. OsMADS1, an E-class MADS-box gene, is an important regulator of rice flower development. Studies of several partial loss-of-function and knockdown mutants show var…	a new, stable, null mutant of OsMADS1 was generated in an indica rice . the mutant displayed severe defects in all floral organs including the lemma and palea . a null mutation could be relevant in the differentiation and development of palea, authors say .	Planta	253	2	39	1432-2048 (Electronic)	10.1007/s00425-020-03547-3	https://www.ncbi.nlm.nih.gov/pubmed/33474591
Kantsurova Rudaya, E. S. | Ivanova, A. N. | Kozyulina, P. Y. | Dolgikh, E. A.	All-Russia Research Institute for Agricultural Microbiology, Podbelsky Chausse 3, Pushkin, 196608 St. Petersburg, Russia.	Exogenously Applied Cytokinin Altered the Bacterial Release and Subsequent Stages of Nodule Development in Pea Ipd3/Cyclops Mutant	Exogenously Applied Cytokinin Altered the Bacterial Release and Subsequent Stages of Nodule Development in Pea Ipd3/Cyclops Mutant	2023	IPD3/CYCLOPS transcription factor	Regulation of plant hormonal status is one of the major targets of symbiotic signaling during nodule formation in legume plants. However, the genetic and hormonal networks that regulate transition to differentiation of nodules are not well-characterized in legume plants. Analysis of plant mutants forming nodules impaired in rhizobial infection allowed us to identify some regulators involved in th…	regulation of plant hormonal status is one of the major targets of symbiotic signaling . mutants forming nodules impaired in rhizobial infection allowed us to identify some regulators . cytokinin treatment stimulated bacterial release and increased percentage of infected cells .	Plants (Basel)	12	3		2223-7747 (Print)	10.3390/plants12030657	https://www.ncbi.nlm.nih.gov/pubmed/36771742
Kapazoglou, A. | Engineer, C. | Drosou, V. | Kalloniati, C. | Tani, E. | Tsaballa, A. | Kouri, E. D. | Ganopoulos, I. | Flemetakis, E. | Tsaftaris, A. S.	Institute of Agrobiotechnology (INA) , CERTH, Thermi-Thessaloniki, GR-57001, Greece.	The study of two barley type I-like MADS-box genes as potential targets of epigenetic regulation during seed development	The study of two barley type I-like MADS-box genes as potential targets of epigenetic regulation during seed development	2012	Abscisic Acid/pharmacology	BACKGROUND: MADS-box genes constitute a large family of transcription factors functioning as key regulators of many processes during plant vegetative and reproductive development. Type II MADS-box genes have been intensively investigated and are mostly involved in vegetative and flowering development. A growing number of studies of Type I MADS-box genes in Arabidopsis, have assigned crucial roles…	a growing number of studies of Type I MADS-box genes in Arabidopsis have assigned crucial roles for these genes . reports on agronomically important cereals such as barley and wheat are scarce .	BMC Plant Biol	12		166	1471-2229 (Electronic)	10.1186/1471-2229-12-166	https://www.ncbi.nlm.nih.gov/pubmed/22985436
Kappel, S. | Eggeling, R. | Rumpler, F. | Groth, M. | Melzer, R. | Theissen, G.	Matthias Schleiden Institute/Genetics, Friedrich Schiller University Jena, Philosophenweg 12, 07743, Jena, Germany.	DNA-binding properties of the MADS-domain transcription factor SEPALLATA3 and mutant variants characterized by SELEX-seq	DNA-binding properties of the MADS-domain transcription factor SEPALLATA3 and mutant variants characterized by SELEX-seq	2021	Arabidopsis/genetics/metabolism	We studied the DNA-binding profile of the MADS-domain transcription factor SEPALLATA3 and mutant variants by SELEX-seq. DNA-binding characteristics of SEPALLATA3 mutant proteins lead us to propose a novel DNA-binding mode. MIKC-type MADS-domain proteins, which function as essential transcription factors in plant development, bind as dimers to a 10-base-pair AT-rich motif termed CArG-box. However,…	DNA-binding characteristics of SEPALLATA3 mutant proteins led us to propose a novel mode . Abstract MIKC-type MADS-domain proteins bind as dimers to a 10-base-pair AT-rich motif . arginine residue is especially important for recognition of nucleotides at positions 3 and 8 .	Plant Mol Biol	105	04-May	543-557	1573-5028 (Electronic)	10.1007/s11103-020-01108-6	https://www.ncbi.nlm.nih.gov/pubmed/33486697
Kaufmann, K. | Muino, J. M. | Jauregui, R. | Airoldi, C. A. | Smaczniak, C. | Krajewski, P. | Angenent, G. C.	Business Unit Bioscience, Plant Research International, Wageningen, The Netherlands.	Target genes of the MADS transcription factor SEPALLATA3: integration of developmental and hormonal pathways in the Arabidopsis flower	Target genes of the MADS transcription factor SEPALLATA3: integration of developmental and hormonal pathways in the Arabidopsis flower	2009	Arabidopsis/*genetics/growth & development	The molecular mechanisms by which floral homeotic genes act as major developmental switches to specify the identity of floral organs are still largely unknown. Floral homeotic genes encode transcription factors of the MADS-box family, which are supposed to assemble in a combinatorial fashion into organ-specific multimeric protein complexes. Major mediators of protein interactions are MADS-domain …	floral homeotic genes encode transcription factors of the MADS-box family . they are supposed to assemble in a combinatorial fashion into organ-specific protein complexes . the results show that SEPALLATA3 binds to thousands of sites in the genome .	PLoS Biol	7	4	e1000090	1545-7885 (Electronic)	10.1371/journal.pbio.1000090	https://www.ncbi.nlm.nih.gov/pubmed/19385720
Ke, S. | Liu, X. J. | Luan, X. | Yang, W. | Zhu, H. | Liu, G. | Zhang, G. | Wang, S.	State Key Laboratory for Conservation and Utilization of Subtropical Agro-Bioresources, Guangdong Key Laboratory of Plant Molecular Breeding, College of Agriculture, South China Agricultural University, Guangzhou 510642, China.	Genome-wide transcriptome profiling provides insights into panicle development of rice (Oryza sativa L.)	Genome-wide transcriptome profiling provides insights into panicle development of rice (Oryza sativa L.)	2018	Crops, Agricultural/genetics/growth & development	Panicle architecture is an important component of agronomic trait in rice, which is also a key ingredient that could influence yield and quality of rice. In the panicle growth and development process, there are a series of complicated molecular and cellular events which are regulated by many interlinking genes. In this study, to explore the potential mechanism and identify genes and pathways invo…	a range of 40.5 to 54.1 million clean reads was aligned to 31,209 genes . a total of 726, 1121 and 2584 differentially expressed genes (DEGs) were identified at stages 1, 2 and 3 .	Gene	675		285-300	1879-0038 (Electronic)	10.1016/j.gene.2018.06.105	https://www.ncbi.nlm.nih.gov/pubmed/29969697
Khurana, R. | Bhimrajka, S. | Sivakrishna Rao, G. | Verma, V. | Boora, N. | Gawande, G. | Kapoor, M. | Rao, K. V. | Kapoor, S.	Interdisciplinary Centre for Plant Genomics and Department of Plant Molecular Biology, University of Delhi South Campus, New Delhi, India.	Characterization of Transcription Regulatory Domains of OsMADS29: Identification of Proximal Auxin-Responsive Domains and a Strong Distal Negative Element	Characterization of Transcription Regulatory Domains of OsMADS29: Identification of Proximal Auxin-Responsive Domains and a Strong Distal Negative Element	2022	MADS-box	OsMADS29 (M29) [TT16 rice ortholog] is a seed-specific MADS-box transcription factor involved in programmed cell death of nucellar tissue and maintaining auxin:cytokinin homeostasis. It affects embryo and endosperm development and starch filling during seed development in rice. Its expression seems to be tightly regulated by developmental, spatial, and temporal cues; however, cis- and trans-regul…	OsMADS29 (M29) is a seed-specific MADS-box transcription factor . it affects embryo and endosperm development and starch filling during seed development in rice . its expression seems to be tightly regulated by developmental, spatial, and temporal cues .	Front Plant Sci	13		850956	1664-462X (Print)	10.3389/fpls.2022.850956	https://www.ncbi.nlm.nih.gov/pubmed/35557721
Kim, D. Y. | Hong, M. J. | Seo, Y. W.	Department of Biotechnology, Korea University, Seoul, Republic of Korea.	Genome-wide transcript analysis of inflorescence development in wheat	Genome-wide transcript analysis of inflorescence development in wheat	2019	Gene Expression Profiling	The process of inflorescence development is directly related to yield components that determine the final grain yield in most cereal crops. Here, microarray analysis was conducted for four different developmental stages of inflorescence to identify genes expressed specifically during inflorescence development. To select inflorescence-specific expressed genes, we conducted meta-analysis using 1245…	microarray analysis was conducted for four different developmental stages of inflorescence . we identified genes expressed specifically during the early stages . early stages were accompanied by a significant upregulation of cell differentiation genes . later stages were less expressed and played roles in hormone biosynthesis and meiosis .	Genome	62	9	623-633	1480-3321 (Electronic)	10.1139/gen-2018-0200	https://www.ncbi.nlm.nih.gov/pubmed/31269405
Kim, E. J. | Hong, W. J. | Kim, Y. J. | Jung, K. H.	Graduate School of Biotechnology & Crop Biotech Institute, Kyung Hee University, Yongin-si 17104, Korea.	Transcriptome Analysis of Triple Mutant for OsMADS62, OsMADS63, and OsMADS68 Reveals the Downstream Regulatory Mechanism for Pollen Germination in Rice (Oryza sativa)	Transcriptome Analysis of Triple Mutant for OsMADS62, OsMADS63, and OsMADS68 Reveals the Downstream Regulatory Mechanism for Pollen Germination in Rice (Oryza sativa)	2021	Cell Wall/metabolism	The MADS (MCM1-AGAMOUS-DEFFICIENS-SRF) gene family has a preserved domain called MADS-box that regulates downstream gene expression as a transcriptional factor. Reports have revealed three MADS genes in rice, OsMADS62, OsMADS63, and OsMADS68, which exhibits preferential expression in mature rice pollen grains. To better understand the transcriptional regulation of pollen germination and tube grow…	the MADS gene family has a preserved domain called MADS-box . it regulates downstream gene expression as a transcriptional factor . the triple knockout (KO) mutant showed a complete sterile phenotype .	Int J Mol Sci	23	1		1422-0067 (Electronic)	10.3390/ijms23010239	https://www.ncbi.nlm.nih.gov/pubmed/35008665
Kim, S. | Koh, J. | Yoo, M. J. | Kong, H. | Hu, Y. | Ma, H. | Soltis, P. S. | Soltis, D. E.	Department of Botany, University of Florida, Gainesville, FL 32611, USA. sangtae@botany.ufl.edu	Expression of floral MADS-box genes in basal angiosperms: implications for the evolution of floral regulators	Expression of floral MADS-box genes in basal angiosperms: implications for the evolution of floral regulators	2005	Evolution, Molecular	The ABC model of floral organ identity is based on studies of Arabidopsis and Antirrhinum, both of which are highly derived eudicots. Most of the genes required for the ABC functions in Arabidopsis and Antirrhinum are members of the MADS-box gene family, and their orthologs are present in all major angiosperm lineages. Although the eudicots comprise 75% of all angiosperms, most of the diversity i…	most of the genes required for the ABC functions in Arabidopsis and Antirrhinum are members of the MADS-box gene family . their orthologs are present in all major angiosperm lineages . most of diversity in arrangement and number of floral parts is actually found among basal eudicots .	Plant J	43	5	724-44	0960-7412 (Print)	10.1111/j.1365-313X.2005.02487.x	https://www.ncbi.nlm.nih.gov/pubmed/16115069
Kim, Sun-Hyung | Hamada, Tatsuro | Otani, Matoyasu | Shimada, Takiko		Isolation and characterization of MADS box genes possibly related to root development in sweetpotato (Ipomoea batatas L. Lam.)	Isolation and characterization of MADS box genes possibly related to root development in sweetpotato (Ipomoea batatas L. Lam.)	2005		Development of the tuberous root of sweetpotato coincides with abnormal vascular cambium activity. The genes and pathways predominately active for vascular morphogenesis in sweetpotato root are unknown. In this study, using a reverse transcription-polymerase chain reaction (RT-PCR) approach, we found three sweetpotato MADS box genes expressed in root tissues.lbAGL17 is anAGL17 clade MADS box gene…	the genes and pathways predominately active for vascular morphogenesis in sweetpotato root are unknown . lbAGL17 is an AGL17 clade MADS box gene, and was mainly expressed in tuberous root as demonstrated by RT-PCR .	Journal of Plant Biology	48	4	387-393	1226-9239	10.1007/bf03030580	https://www.semanticscholar.org/paper/8ee99306e7e94b975b01a5df9fd9fc2a041bd3cd
Kim, S. H. | Ji, S. D. | Lee, H. S. | Jeon, Y. A. | Shim, K. C. | Adeva, C. | Luong, N. H. | Yuan, P. | Kim, H. J. | Tai, T. H. | Ahn, S. N.	Department of Agronomy, College of Agriculture & Life Sciences, Chungnam National University, Daejeon, South Korea.	A Novel Embryo Phenotype Associated With Interspecific Hybrid Weakness in Rice Is Controlled by the MADS-Domain Transcription Factor OsMADS8	A Novel Embryo Phenotype Associated With Interspecific Hybrid Weakness in Rice Is Controlled by the MADS-Domain Transcription Factor OsMADS8	2021	abscisic acid	A novel hybrid weakness gene, DTE9, associated with a dark tip embryo (DTE) trait, was observed in CR6078, an introgression line derived from a cross between the Oryza sativa spp. japonica "Hwayeong" (HY) and the wild relative Oryza rufipogon. CR6078 seeds exhibit protruding embryos and flowers have altered inner floral organs. DTE9 was also associated with several hybrid weakness symptoms includ…	map-based cloning and transgenic approaches revealed that two recessive complementary genes were responsible for the expression of the DTE trait . no sequence differences were observed between the two parental lines .	Front Plant Sci	12		778008	1664-462X (Print)	10.3389/fpls.2021.778008	https://www.ncbi.nlm.nih.gov/pubmed/35069634
Kim, S. H. | Mizuno, K. | Fujimura, T.	Institute of Agricultural and Forest Engineering, University of Tsukuba, Ibaraki, 305-8572, Japan.	Isolation of MADS-box genes from sweet_potato (Ipomoea batatas (L.) Lam.) expressed specifically in vegetative tissues	Isolation of MADS-box genes from sweet_potato (Ipomoea batatas (L.) Lam.) expressed specifically in vegetative tissues	2002	Amino Acid Sequence	New MADS-domain genes, IbMADS3 and IbMADS4, were isolated from pigmented and tuber-forming root tissue in sweet_potato (Ipomoea batatas L.) . Both genes were expressed preferentially in vegetative tissues, especially root tissues; white fibrous roots, pigmented roots, and developing tuberous roots. On sequence alignment, these genes fell into the STMADS group composed of SVP, STMADS11, STMADS16 a…	genes expressed preferentially in vegetative tissues, especially root tissues . transcripts of these two genes in roots were found in the vascular cambium region . genes may lead to a higher proliferative potential of vegetative tissue .	Plant Cell Physiol	43	3	314-22	0032-0781 (Print)	10.1093/pcp/pcf043	https://www.ncbi.nlm.nih.gov/pubmed/11917086
Kim, W. | Latrasse, D. | Servet, C. | Zhou, D. X.	Institut de Biologie des Plantes, Universite Paris sud 11, CNRS, 91405 Orsay, France.	Arabidopsis histone deacetylase HDA9 regulates flowering time through repression of AGL19	Arabidopsis histone deacetylase HDA9 regulates flowering time through repression of AGL19	2013	Acetylation	Flowering time is tightly controlled by several regulatory pathways including photoperiod, vernalization in which epigenetic processes are involved. In this work, we have found that the Arabidopsis histone deacetylase gene HDA9 is involved in flowering time control. Mutation of the gene led to an early flowering phenotype in short day grown plants while without effect in long days. Analysis of fl…	hda9 mutations led to an early flowering phenotype in short day grown plants . mutations had no effect on CO , SOC1 or FLC . induced levels of AGL19 expression were comparable to that of the gene under long day conditions .	Biochem Biophys Res Commun	432	2	394-8	1090-2104 (Electronic)	10.1016/j.bbrc.2012.11.102	https://www.ncbi.nlm.nih.gov/pubmed/23237803
Kinoshita, A. | Vayssieres, A. | Richter, R. | Sang, Q. | Roggen, A. | van Driel, A. D. | Smith, R. S. | Coupland, G.	Max Planck Institute for Plant Breeding Research, Cologne, Germany.	Regulation of shoot meristem shape by photoperiodic signaling and phytohormones during floral induction of Arabidopsis	Regulation of shoot meristem shape by photoperiodic signaling and phytohormones during floral induction of Arabidopsis	2020	Arabidopsis	Floral transition, the onset of plant reproduction, involves changes in shape and identity of the shoot apical meristem (SAM) . The change in shape, termed doming, occurs early during floral transition when it is induced by environmental cues such as changes in day-length, but how it is regulated at the cellular level is unknown. We defined the morphological and cellular features of the SAM durin…	doming occurs early during floral transition when it is induced by environmental cues . both cell number and size increased during doming . doming was partly controlled by the gene regulatory network that triggers flowering .	Elife	9			2050-084X (Electronic)	10.7554/eLife.60661	https://www.ncbi.nlm.nih.gov/pubmed/33315012
Kirkbride, R. C. | Lu, J. | Zhang, C. | Mosher, R. A. | Baulcombe, D. C. | Chen, Z. J.	Department of Molecular Biosciences, The University of Texas at Austin, Austin, TX 78712.	Maternal small RNAs mediate spatial-temporal regulation of gene expression, imprinting, and seed development in Arabidopsis	Maternal small RNAs mediate spatial-temporal regulation of gene expression, imprinting, and seed development in Arabidopsis	2019	Arabidopsis/*embryology/*genetics	Arabidopsis seed development involves maternal small interfering RNAs (siRNAs) that induce RNA-directed DNA methylation (RdDM) through the NRPD1-mediated pathway. To investigate their biological functions, we characterized siRNAs in the endosperm and seed coat that were separated by laser-capture microdissection (LCM) in reciprocal genetic crosses with an nrpd1 mutant. We also monitored the spati…	a group of maternally expressed NRPD1-siRNA loci targets endosperm-preferred genes . altered expression of these siRNA-targeted genes affects seed size . corresponding maternal siRNAs could account for parent-of-origin effects .	Proc Natl Acad Sci U S A	116	7	2761-2766	1091-6490 (Electronic)	10.1073/pnas.1807621116	https://www.ncbi.nlm.nih.gov/pubmed/30692258
Kitazawa, Y. | Iwabuchi, N. | Maejima, K. | Matsumoto, O. | Suzuki, M. | Matsuyama, J. | Koinuma, H. | Oshima, K. | Namba, S. | Yamaji, Y.	Department of Agricultural and Environmental Biology, Graduate School of Agricultural and Life Sciences, The University of Tokyo, Tokyo, Japan.	Random mutagenesis-based screening of the interface of phyllogen, a bacterial phyllody-inducing effector, for interaction with plant MADS-box proteins	Random mutagenesis-based screening of the interface of phyllogen, a bacterial phyllody-inducing effector, for interaction with plant MADS-box proteins	2023	MADS-box transcription factors	To understand protein function deeply, it is important to identify how it interacts physically with its target. Phyllogen is a phyllody-inducing effector that interacts with the K domain of plant MADS-box transcription factors (MTFs) , which is followed by proteasome-mediated degradation of the MTF. Although several amino acid residues of phyllogen have been identified as being responsible for th…	phyllogen interacts with the K domain of plant MADS-box transcription factors (MTFs) this interaction is followed by proteasome-mediated degradation of the MTF . the exact interface has not been elucidated .	Front Plant Sci	14		1058059	1664-462X (Print)	10.3389/fpls.2023.1058059	https://www.ncbi.nlm.nih.gov/pubmed/37056494
Kitazawa, Y. | Iwabuchi, N. | Maejima, K. | Sasano, M. | Matsumoto, O. | Koinuma, H. | Tokuda, R. | Suzuki, M. | Oshima, K. | Namba, S. | Yamaji, Y.	Department of Agricultural and Environmental Biology, Graduate School of Agricultural and Life Sciences, The University of Tokyo, Tokyo 113-8657, Japan.	A phytoplasma effector acts as a ubiquitin-like mediator between floral MADS-box proteins and proteasome shuttle proteins	A phytoplasma effector acts as a ubiquitin-like mediator between floral MADS-box proteins and proteasome shuttle proteins	2022	Flowers/metabolism	Plant pathogenic bacteria have developed effectors to manipulate host cell functions to facilitate infection. A certain number of effectors use the conserved ubiquitin-proteasome system in eukaryotic to proteolyze targets. The proteasome utilization mechanism is mainly mediated by ubiquitin interaction with target proteins destined for degradation. Phyllogens are a family of protein effectors pro…	phyllogens are a family of protein effectors produced by pathogenic phytoplasmas . they induce proteasomal degradation of floral MADS-box transcription factors (MTFs) in the presence of RAD23 shuttle proteins, they recruit ubiquitinated proteins to the proteasome .	Plant Cell	34	5	1709-1723	1532-298X (Electronic)	10.1093/plcell/koac062	https://www.ncbi.nlm.nih.gov/pubmed/35234248
Kobayashi, K. | Maekawa, M. | Miyao, A. | Hirochika, H. | Kyozuka, J.	Graduate School of Agriculture and Life Sciences, University of Tokyo, Tokyo, Japan.	PANICLE PHYTOMER2 (PAP2) , encoding a SEPALLATA subfamily MADS-box protein, positively controls spikelet meristem identity in rice	PANICLE PHYTOMER2 (PAP2) , encoding a SEPALLATA subfamily MADS-box protein, positively controls spikelet meristem identity in rice	2010	Arabidopsis Proteins/genetics/metabolism	In rice panicle development, new meristems are generated sequentially in an organized manner and acquire their identity in a time- and position-dependent manner. In the panicle of the panicle phytomer2-1 (pap2-1) mutant, the pattern of meristem initiation is disorganized and newly formed meristems show reduced competency to become spikelet meristems, resulting in the transformation of early arisi…	in rice panicle development, new meristems are generated sequentially in an organized manner . newly formed spikelets are transformed into rachis branches . map-based cloning revealed thatPAP2encodes a member of the SEPALLATA subfamily .	Plant Cell Physiol	51	1	47-57	1471-9053 (Electronic)	10.1093/pcp/pcp166	https://www.ncbi.nlm.nih.gov/pubmed/19933267
Kobayashi, K. | Yasuno, N. | Sato, Y. | Yoda, M. | Yamazaki, R. | Kimizu, M. | Yoshida, H. | Nagamura, Y. | Kyozuka, J.	Graduate School of Agriculture and Life Sciences, University of Tokyo, Tokyo, Japan.	Inflorescence meristem identity in rice is specified by overlapping functions of three AP1/FUL-like MADS box genes and PAP2, a SEPALLATA MADS box gene	Inflorescence meristem identity in rice is specified by overlapping functions of three AP1/FUL-like MADS box genes and PAP2, a SEPALLATA MADS box gene	2012	Flowers/genetics/growth & development/*metabolism	In plants, the transition to reproductive growth is of particular importance for successful seed production. Transformation of the shoot apical meristem (SAM) to the inflorescence meristem (IM) is the crucial first step in this transition. Using laser microdissection and microarrays, we found that expression of PANICLE PHYTOMER2 (PAP2) and three APETALA1 (AP1) /FRUITFULL (FUL) -like genes (MADS14…	the transition from the shoot apical meristem (SAM) to the inflorescence is crucial . expression of PAP2 and threeAPETALA1(AP1)/FRUITFULL(FUL)-like genes is induced . depletion ofPAP2function from triple knockdown plants inhibited the transition .	Plant Cell	24	5	1848-59	1532-298X (Electronic)	10.1105/tpc.112.097105	https://www.ncbi.nlm.nih.gov/pubmed/22570445
Kohler, C. | Hennig, L. | Spillane, C. | Pien, S. | Gruissem, W. | Grossniklaus, U.	Institute of Plant Biology & Zurich-Basel Plant Science Center, University of Zurich, CH-8008 Zurich, Switzerland. ckoehler@botinst.unizh.ch	The Polycomb-group protein MEDEA regulates seed development by controlling expression of the MADS-box gene PHERES1	The Polycomb-group protein MEDEA regulates seed development by controlling expression of the MADS-box gene PHERES1	2003	Arabidopsis	The Polycomb-group (PcG) proteins MEDEA, FERTILIZATION INDEPENDENT ENDOSPERM, and FERTILIZATION INDEPENDENT SEED2 regulate seed development in Arabidopsis by controlling embryo and endosperm proliferation. All three of these FIS-class proteins are likely subunits of a multiprotein PcG complex, which epigenetically regulates downstream target genes that were previously unknown. Here we show that t…		Genes Dev	17	12	1540-53	0890-9369 (Print)	10.1101/gad.257403	https://www.ncbi.nlm.nih.gov/pubmed/12815071
Koizumi, K. | Wu, S. | MacRae-Crerar, A. | Gallagher, K. L.	Department of Biology, University of Pennsylvania, Philadelphia, PA 19104, USA.	An essential protein that interacts with endosomes and promotes movement of the SHORT-ROOT transcription factor	An essential protein that interacts with endosomes and promotes movement of the SHORT-ROOT transcription factor	2011	Arabidopsis/genetics/growth & development/*metabolism	Plant cells can communicate through the direct transport of transcription factors [1-7]. One of the best-studied examples of this phenomenon is SHORT-ROOT (SHR) , which moves from the stele cells into the endodermis and root tip of Arabidopsis, where it specifies endodermal cell identity and stem cell function, respectively [8-10]. In the endodermis, SHR upregulates the transcription factors SCAR…	a novel protein, SHORT-ROOT INTERACTING EMBRYONIC LETHAL (SIEL), has been identified . it interacts with SHR, CAPRICE (CPC), TARGET OF MONOPTEROUS 7 (TMO7) and AGAMOUS-LIKE 21 (AGL21)	Curr Biol	21	18	1559-64	1879-0445 (Electronic)	10.1016/j.cub.2011.08.013	https://www.ncbi.nlm.nih.gov/pubmed/21924907
Kong, X. | Luo, L. | Zhao, J. | Chen, Q. | Chang, G. | Huang, J. | Yang, Y. | Hu, X.	Key Laboratory for Plant Diversity and Biogeography of East Asia, Kunming Institute of Botany, Chinese Academy of Sciences, Kunming, China.	Expression of FRIGIDA in root inhibits flowering in Arabidopsis thaliana	Expression of FRIGIDA in root inhibits flowering in Arabidopsis thaliana	2019	Arabidopsis/*genetics/*growth & development/metabolism	FRIGIDA (FRI) , as the major regulator of flowering time in Arabidopsis accessions, can activate its target FLOWERING LOCUS C (FLC) to delay flowering before vernalization. In addition to FLC, other FRI targets also exist in Arabidopsis. Although leaves sense environmental cues to modulate flowering time, it is not known if roots also regulate the floral transition. In this study, we investigated…	FRIGIDA(FRI) is the major regulator of flowering time in Arabidopsis accessions . it can activate its targetFLOWERING LOCUS C(FLC) to delay flowering .	J Exp Bot	70	19	5101-5114	1460-2431 (Electronic)	10.1093/jxb/erz287	https://www.ncbi.nlm.nih.gov/pubmed/31340000
Kong, X. | Wang, F. | Geng, S. | Guan, J. | Tao, S. | Jia, M. | Sun, G. | Wang, Z. | Wang, K. | Ye, X. | Ma, J. | Liu, D. | Wei, Y. | Zheng, Y. | Fu, X. | Mao, L. | Lan, X. | Li, A.	Triticeae Research Institute, Sichuan Agricultural University, Chengdu, China.	The wheat AGL6-like MADS-box gene is a master regulator for floral organ identity and a target for spikelet meristem development manipulation	The wheat AGL6-like MADS-box gene is a master regulator for floral organ identity and a target for spikelet meristem development manipulation	2022	Flowers	The AGAMOUS-LIKE6 (AGL6) -like genes are ancient MADS-box genes and are functionally studied in a few model plants. The knowledge of these genes in wheat remains limited. Here, by studying a 'double homoeolog mutant' of the AGL6 gene in tetraploid wheat, we showed that AGL6 was required for the development of all four whorls of floral organs with dosage-dependent effect on floret fertility. Yeast…	the AGAMOUS-LIKE6 ( AGL6 )-like genes are ancient MADS-box genes . they are functionally studied in a few model plants . but the knowledge of these genes in wheat remains limited .	Plant Biotechnol J	20	1	75-88	1467-7652 (Electronic)	10.1111/pbi.13696	https://www.ncbi.nlm.nih.gov/pubmed/34487615
Koo, S. C. | Bracko, O. | Park, M. S. | Schwab, R. | Chun, H. J. | Park, K. M. | Seo, J. S. | Grbic, V. | Balasubramanian, S. | Schmid, M. | Godard, F. | Yun, D. J. | Lee, S. Y. | Cho, M. J. | Weigel, D. | Kim, M. C.	Division of Applied Life Science (BK21 program) , Plant Molecular Biology and Biotechnology Research Center and Environmental Biotechnology National Core Research Center, Gyeongsang National University, Jinju 660-701, Korea.	Control of lateral organ development and flowering time by the Arabidopsis thaliana MADS-box Gene AGAMOUS-LIKE6	Control of lateral organ development and flowering time by the Arabidopsis thaliana MADS-box Gene AGAMOUS-LIKE6	2010	Arabidopsis/*genetics/growth & development/metabolism	MADS-domain transcription factors play pivotal roles in various developmental processes. The lack of simple loss-of-function phenotypes provides impediments to understand the biological function of some of the MADS-box transcription factors. Here we have characterized the potential role of the Arabidopsis thaliana AGAMOUS-LIKE6 (AGL6) gene by fusing full-length coding sequence with transcriptiona…	lack of simple loss-of-function phenotypes provides impediments to understand biological function of some of the MADS-box transcription factors . here we have characterized the potential role of the Arabidopsis thaliana AGAMOUS-LIKE6 gene by fusing full-length coding sequence with transcriptional activator and repressor domains . we suggest a role for AGL6 in lateral organ development and	Plant J	62	5	807-16	1365-313X (Electronic)	10.1111/j.1365-313X.2010.04192.x	https://www.ncbi.nlm.nih.gov/pubmed/20230491
Koshimizu, S. | Kofuji, R. | Sasaki-Sekimoto, Y. | Kikkawa, M. | Shimojima, M. | Ohta, H. | Shigenobu, S. | Kabeya, Y. | Hiwatashi, Y. | Tamada, Y. | Murata, T. | Hasebe, M.	Division of Evolutionary Biology, National Institute for Basic Biology, Okazaki, 444-8585, Japan.	Physcomitrella MADS-box genes regulate water supply and sperm movement for fertilization	Physcomitrella MADS-box genes regulate water supply and sperm movement for fertilization	2018	Bryopsida/*genetics/physiology	MIKC classic (MIKC (C) ) -type MADS-box genes encode transcription factors that function in various developmental processes, including angiosperm floral organ identity. Phylogenetic analyses of the MIKC (C) -type MADS-box family, including genes from non-flowering plants, suggest that the increased numbers of these genes in flowering plants is related to their functional divergence; however, thei…	MIKCC-type MADS-box genes encode transcription factors that function in various developmental processes . precise functions in non-flowering plants and evolution throughout land plant diversification are unknown . phylogenetic analyses suggest increased numbers of these genes in flowering plants is related to functional divergence .	Nat Plants	4	1	36-45	2055-0278 (Electronic)	10.1038/s41477-017-0082-9	https://www.ncbi.nlm.nih.gov/pubmed/29296005
Kradolfer, D. | Hennig, L. | Kohler, C.	Department of Plant Biology and Forest Genetics, Uppsala BioCenter, Swedish University of Agricultural Sciences and Linnean Center of Plant Biology, Uppsala, Sweden.	Increased maternal genome dosage bypasses the requirement of the FIS polycomb repressive complex 2 in Arabidopsis seed development	Increased maternal genome dosage bypasses the requirement of the FIS polycomb repressive complex 2 in Arabidopsis seed development	2013	AGAMOUS Protein, Arabidopsis/genetics/metabolism	Seed development in flowering plants is initiated after a double fertilization event with two sperm cells fertilizing two female gametes, the egg cell and the central cell, leading to the formation of embryo and endosperm, respectively. In most species the endosperm is a polyploid tissue inheriting two maternal genomes and one paternal genome. As a consequence of this particular genomic configura…	in most species the endosperm is a polyploid tissue inheriting two maternal genomes and one paternal genome . the underlying forces that led to the evolution of the FIS-PRC2 remain unknown . reduced expression of the AGL62 gene might be responsible for reduced seed size .	PLoS Genet	9	1	e1003163	1553-7404 (Electronic)	10.1371/journal.pgen.1003163	https://www.ncbi.nlm.nih.gov/pubmed/23326241
Kramer, E. M. | Jaramillo, M. A. | Di Stilio, V. S.	Department of Organismic and Evolutionary Biology, Harvard University, Cambridge, MA 02138, USA. ekramer@oeb.harvard.edu	Patterns of gene duplication and functional evolution during the diversification of the AGAMOUS subfamily of MADS box genes in angiosperms	Patterns of gene duplication and functional evolution during the diversification of the AGAMOUS subfamily of MADS box genes in angiosperms	2004	Amino Acid Sequence	Members of the AGAMOUS (AG) subfamily of MIKC-type MADS-box genes appear to control the development of reproductive organs in both gymnosperms and angiosperms. To understand the evolution of this subfamily in the flowering plants, we have identified 26 new AG-like genes from 15 diverse angiosperm species. Phylogenetic analyses of these genes within a large data set of AG-like sequences show that …	members of the AGAMOUS (AG) subfamily of MIKC-type MADS-box genes control reproductive organs in gymnosperms and angiosperms . phylogenetic analyses show ancient gene duplications were critical in shaping the evolution of the subfamily .	Genetics	166	2	1011-23	0016-6731 (Print)	10.1534/genetics.166.2.1011	https://www.ncbi.nlm.nih.gov/pubmed/15020484
Kuijer, H. N. J. | Shirley, N. J. | Khor, S. F. | Shi, J. | Schwerdt, J. | Zhang, D. | Li, G. | Burton, R. A.	School of Agriculture Food and Wine, University of Adelaide, Glen Osmond, SA, Australia.	Transcript Profiling of MIKCc MADS-Box Genes Reveals Conserved and Novel Roles in Barley Inflorescence Development	Transcript Profiling of MIKCc MADS-Box Genes Reveals Conserved and Novel Roles in Barley Inflorescence Development	2021	ABC model	MADS-box genes have a wide range of functions in plant reproductive development and grain production. The ABCDE model of floral organ development shows that MADS-box genes are central players in these events in dicotyledonous plants but the applicability of this model remains largely unknown in many grass crops. Here, we show that transcript analysis of all MIKCc MADS-box genes through barley (Ho…	the ABCDE model of floral organ development shows that MADS-box genes are central players in plant reproductive development . the applicability of this model remains largely unknown in many grass crops . a transcript analysis of all MIKCc MADS box genes through barley inflorescence development reveals co-expression groups .	Front Plant Sci	12		705286	1664-462X (Print)	10.3389/fpls.2021.705286	https://www.ncbi.nlm.nih.gov/pubmed/34539699
Kumar, G. | Arya, P. | Gupta, K. | Randhawa, V. | Acharya, V. | Singh, A. K.	Department of Biotechnology, CSIR-Institute of Himalayan Bioresource Technology, Palampur-176 061 (HP) , India.	Comparative phylogenetic analysis and transcriptional profiling of MADS-box gene family identified DAM and FLC-like genes in apple (Malus domesticus) (Malusx domestica)	Comparative phylogenetic analysis and transcriptional profiling of MADS-box gene family identified DAM and FLC-like genes in apple (Malus domesticus) (Malusx domestica)	2016	Gene Expression Profiling	The MADS-box transcription factors play essential roles in various processes of plant growth and development. In the present study, phylogenetic analysis of 142 apple (Malus domesticus) MADS-box proteins with that of other dicotyledonous species identified six putative Dormancy-Associated MADS-box (DAM) and four putative Flowering Locus C-like (FLC-like) proteins. In order to study the expression…	phylogenetic analysis of 142 apple MADS-box proteins with that of other species . RNA-seq analysis of 3 apical and 5 spur bud stages during dormancy, 6 flower stages and 7 fruit development stages . dramatic reduction in expression of two MdDAMs suggests their role as flowering-repressors in apple .	Sci Rep	6		20695	2045-2322 (Electronic)	10.1038/srep20695	https://www.ncbi.nlm.nih.gov/pubmed/26856238
Kumar, K. | Srivastava, H. | Das, A. | Tribhuvan, K. U. | Durgesh, K. | Joshi, R. | Sevanthi, A. M. | Jain, P. K. | Singh, N. K. | Gaikwad, K.	ICAR-National Institute for Plant Biotechnology, New Delhi, 110012 India. GRID: grid.418105.9. ISNI: 0000 0001 0643 7375	Identification and characterization of MADS box gene family in pigeonpea for their role during floral transition	Identification and characterization of MADS box gene family in pigeonpea for their role during floral transition	2021	Flc	MADS box genes are class of transcription factors involved in various physiological and developmental processes in plants. To understand their role in floral transition-related pathways, a genome-wide identification was done in Cajanus cajan, identifying 102 members which were classified into two different groups based on their gene structure. The status of all these genes was further analyzed in…	a genome-wide identification was done in Cajanus cajan, identifying 102 members . the status of all these genes was further analyzed in three wild species . only a single copy of both FLOWERING LOCUS C (FLC) and SHORT VEGETATIVE PHASE (SVP) genes were found .	3 Biotech	11	2	108	2190-572X (Print)	10.1007/s13205-020-02605-7	https://www.ncbi.nlm.nih.gov/pubmed/33569264
Kumpeangkeaw, A. | Tan, D. | Fu, L. | Han, B. | Sun, X. | Hu, X. | Ding, Z. | Zhang, J.	International College, Huazhong Agricultural University, Lion Mountain, Wuhan, China.	Asymmetric birth and death of type I and type II MADS-box gene subfamilies in the rubber tree facilitating laticifer development	Asymmetric birth and death of type I and type II MADS-box gene subfamilies in the rubber tree facilitating laticifer development	2019	Arabidopsis/genetics/growth & development	The rubber tree (Hevea brasiliensis Muell. Arg.) is a rubber producing crop and contains specialized laticifers. MADS-box genes are a family of transcription factor genes that regulate plant development, especially floral organ and gametophyte development. 97 MADS-box genes were identified in the rubber tree through transcriptomes and genome mining. 93.8% of the genes were mapped onto the genome …	97 MADS-box genes were identified in the rubber tree through transcriptomes and genome mining . phylogenetic analysis indicates that most (70, 72.2%) of the genes belong to type II subfamily . number of type I genes in rubber tree is only 27 (27.8%), a much smaller number compared to their orthologous genes in Arabidopsis .	PLoS One	14	4	e0214335	1932-6203 (Electronic)	10.1371/journal.pone.0214335	https://www.ncbi.nlm.nih.gov/pubmed/30934009
Kwantes, M. | Liebsch, D. | Verelst, W.	Department of Plant Breeding and Genetics, Max Planck Institute for Plant Breeding Research, Cologne, Germany. kwantes@mpipz.mpg.de	How MIKC* MADS-box genes originated and evidence for their conserved function throughout the evolution of vascular plant gametophytes	How MIKC* MADS-box genes originated and evidence for their conserved function throughout the evolution of vascular plant gametophytes	2012	Amino Acid Sequence	Land plants have a remarkable life cycle that alternates between a diploid sporophytic and a haploid gametophytic generation, both of which are multicellular and changed drastically during evolution. Classical MIKC MADS-domain (MIKCC) transcription factors are famous for their role in sporophytic development and are considered crucial for its evolution. About the regulation of gametophyte develop…	land plants have a remarkable life cycle that alternates between a diploid sporophytic and a haploid gametophytic generation . evidence indicates that the closely related MIKC* MADS-domain proteins are important for the functioning of thepollen . phylogenetic analysis revealed extraordinary conservation not found in MIKCCgenes .	Mol Biol Evol	29	1	293-302	1537-1719 (Electronic)	10.1093/molbev/msr200	https://www.ncbi.nlm.nih.gov/pubmed/21813465
Lai, X. | Vega-Leon, R. | Hugouvieux, V. | Blanc-Mathieu, R. | van der Wal, F. | Lucas, J. | Silva, C. S. | Jourdain, A. | Muino, J. M. | Nanao, M. H. | Immink, R. | Kaufmann, K. | Parcy, F. | Smaczniak, C. | Zubieta, C.	Laboratoire Physiologie Cellulaire et Vegetale, Universite Grenoble Alpes, CNRS, CEA, INRAE, IRIG-DBSCI-LPCV, Grenoble, France.	The intervening domain is required for DNA-binding and functional identity of plant MADS transcription factors	The intervening domain is required for DNA-binding and functional identity of plant MADS transcription factors	2021	AGAMOUS Protein, Arabidopsis/chemistry/genetics	The MADS transcription factors (TF) are an ancient eukaryotic protein family. In plants, the family is divided into two main lineages. Here, we demonstrate that DNA binding in both lineages absolutely requires a short amino acid sequence C-terminal to the MADS domain (M domain) called the Intervening domain (I domain) that was previously defined only in type II lineage MADS. Structural elucidatio…	the MADS transcription factors (TF) are an ancient eukaryotic protein family . in plants, the family is divided into two main lineages . here, we demonstrate that DNA binding in both lineages absolutely requires the I domain .	Nat Commun	12	1	4760	2041-1723 (Electronic)	10.1038/s41467-021-24978-w	https://www.ncbi.nlm.nih.gov/pubmed/34362909
Lama, K. | Yadav, S. | Rosianski, Y. | Shaya, F. | Lichter, A. | Chai, L. | Dahan, Y. | Freiman, Z. | Peer, R. | Flaishman, M. A.	Institute of Plant Sciences, Agricultural Research Organization, Bet-Dagan, Israel.	The distinct ripening processes in the reproductive and non-reproductive parts of the fig syconium are driven by ABA	The distinct ripening processes in the reproductive and non-reproductive parts of the fig syconium are driven by ABA	2019	Abscisic Acid/antagonists & inhibitors/*pharmacology	The common fig bears a unique closed inflorescence structure, the syconium, composed of small individual drupelets that develop from the ovaries, which are enclosed in a succulent receptacle of vegetative origin. The fig ripening process is traditionally classified as climacteric; however, recent studies have suggested that distinct mechanisms exist in its reproductive and non-reproductive parts.…	fig ripening process traditionally classified as climacteric . but studies suggest distinct mechanisms exist in its reproductive and non-reproductive parts . exogenous ABA, ethephon, fluridone and nordihydroguaiaretic acid (NDGA) up-regulated expression of ethylene-biosynthesis genes .	J Exp Bot	70	1	115-131	1460-2431 (Electronic)	10.1093/jxb/ery333	https://www.ncbi.nlm.nih.gov/pubmed/30239815
Latif, A. | Azam, S. | Shahid, N. | Javed, M. R. | Haider, Z. | Yasmeen, A. | Sadaqat, S. | Shad, M. | Husnain, T. | Rao, A. Q.	Centre of Excellence in Molecular Biology (CEMB) , University of the Punjab, Lahore, Pakistan.	Overexpression of the AGL42 gene in cotton delayed leaf senescence through downregulation of NAC transcription factors	Overexpression of the AGL42 gene in cotton delayed leaf senescence through downregulation of NAC transcription factors	2022	*Gossypium/genetics	Premature leaf senescence negatively influences the physiology and yield of cotton plants. The conserved IDLNL sequence in the C-terminal region of AGL42 MADS-box determines its repressor potential for the down regulation of senescence-related genes. To determine the delay in premature leaf senescence, Arabidopsis AGL42 gene was overexpressed in cotton plants. The absolute quantification of trans…	the conserved IDLNL sequence in the C-terminal region of AGL42 MADS-box determines its repressor potential for the down&nbsp;regulation of senescence-related genes . transgenic cotton plants revealed higher mRNA expression of aGL42 .	Sci Rep	12	1	21093	2045-2322 (Electronic)	10.1038/s41598-022-25640-1	https://www.ncbi.nlm.nih.gov/pubmed/36473939
Lee, H. L. | Irish, V. F.	Department of Molecular, Cellular and Developmental Biology, Yale University, USA.	Gene duplication and loss in a MADS box gene transcription factor circuit	Gene duplication and loss in a MADS box gene transcription factor circuit	2011	Base Sequence	Although many models have been proposed that could lead to the maintenance of gene duplicates, the ways in which interacting gene duplicates influence each other's evolution and function remain poorly understood. Here, we focus on duplication and loss of the B class MADS box transcription factor genes in the euasterids I and the ramifications of such changes on paralog evolution and their encoded…	gene loss in one sublineage was correlated with a deficit of other sublineages . gain or loss of B class MADS box gene paralogs were associated with altered proteinÐprotein interactions among the remaining copies .	Mol Biol Evol	28	12	3367-80	1537-1719 (Electronic)	10.1093/molbev/msr169	https://www.ncbi.nlm.nih.gov/pubmed/21712469
Lee, J. H. | Ryu, H. S. | Chung, K. S. | Pose, D. | Kim, S. | Schmid, M. | Ahn, J. H.	Creative Research Initiatives, Department of Life Sciences, Korea University, Seoul 136-701, South Korea.	Regulation of temperature-responsive flowering by MADS-box transcription factor repressors	Regulation of temperature-responsive flowering by MADS-box transcription factor repressors	2013	Alternative Splicing	Changes in ambient temperature affect flowering time in plants; understanding this phenomenon will be crucial for buffering agricultural systems from the effects of climate change. Here, we show that levels of FLM-beta, an alternatively spliced form of the flowering repressor FLOWERING LOCUS M, increase at lower temperatures, repressing flowering. FLM-beta interacts with SHORT VEGETATIVE PHASE (S…	temperatures affect flowering time in plants . understanding this phenomenon will be crucial for buffering agricultural systems from effects of climate change . here, we show how changes in ambient temperature affect flowers . cnn.com's eric schmidt: "climate change has a profound impact on agriculture"	Science	342	6158	628-32	1095-9203 (Electronic)	10.1126/science.1241097	https://www.ncbi.nlm.nih.gov/pubmed/24030492
Lee, S. | Jeong, D. H. | An, G.	Department of Life Science and National Research Laboratory of Plant Functional Genomics; Pohang University of Science and Technology (POSTECH) ; Pohang, Republic of Korea.	A possible working mechanism for rice SVP-group MADS-box proteins as negative regulators of brassinosteroid responses	A possible working mechanism for rice SVP-group MADS-box proteins as negative regulators of brassinosteroid responses	2008	Br	Most SVP-group MADS-box genes control meristem identity and flowering time. In rice, their roles in regulating the former are well-conserved; however, their involvement in determining the latter is not significant. Characteristically, rice SVP-group MADS-box proteins work as negative regulators in brassinosteroid (BR) responses. To elucidate the molecular mechanism, we studied the localization pa…	most SVP-group MADS-box genes control meristem identity and flowering time . but their involvement in determining the latter is not significant . elucidate molecular mechanism by studying localization patterns for proteins .	Plant Signal Behav	3	7	471-4	1559-2316 (Print)	10.4161/psb.3.7.5677	https://www.ncbi.nlm.nih.gov/pubmed/19704489
Lee, S. | Woo, Y. M. | Ryu, S. I. | Shin, Y. D. | Kim, W. T. | Park, K. Y. | Lee, I. J. | An, G.	Department of Life Science and National Research Laboratory of Plant Functional Genomics, Pohang University of Science and Technology, Pohang 790-784, Republic of Korea.	Further characterization of a rice AGL12 group MADS-box gene, OsMADS26	Further characterization of a rice AGL12 group MADS-box gene, OsMADS26	2008	Arabidopsis/genetics/growth & development	Plant MADS-box genes can be divided into 11 groups. Genetic analysis has revealed that most of them function in flowering-time control, reproductive organ development, and vegetative growth. Here, we elucidated the role of OsMADS26, a member of the AGL12 group. Transcript levels of OsMADS26 were increased in an age-dependent manner in the shoots and roots. Transgenic plants of both rice (Oryza sa…	genetic analysis has revealed that most plant MADS-box genes function in flowering-time control, reproductive organ development, and vegetative growth . transgenic plants of rice (oryza sativa) and Arabidopsis (arabidopsis thaliana) overexpressing this gene exhibited phenotypes related to stress responses .	Plant Physiol	147	1	156-68	0032-0889 (Print)	10.1104/pp.107.114256	https://www.ncbi.nlm.nih.gov/pubmed/18354041
Lehti-Shiu, M. D. | Adamczyk, B. J. | Fernandez, D. E.	Department of Botany, University of Wisconsin-Madison, 430 Lincoln Drive, Madison, WI 53706, USA.	Expression of MADS-box genes during the embryonic phase in Arabidopsis	Expression of MADS-box genes during the embryonic phase in Arabidopsis	2005	AGAMOUS Protein, Arabidopsis/genetics	MADS domain factors play important roles as developmental regulators in plants. In Arabidopsis thaliana, MADS domain proteins have been shown to regulate various processes during the vegetative and reproductive phases. Relatively little is known, however, about family members expressed during the embryonic phase and their function. To determine which MADS-box genes are expressed during the embryo…	eight MADS-box genes appear to be expressed at higher levels during embryonic phase . genes are expressed in cells throughout the endosperm and embryo . no embryo defects were observed in single or double mutants . results suggest multiple regulatory pathways that involve MADS domain factors operate in embryonic tissues .	Plant Mol Biol	58	1	89-107	0167-4412 (Print)	10.1007/s11103-005-4546-3	https://www.ncbi.nlm.nih.gov/pubmed/16028119
Lei, H. J. | Yuan, H. Z. | Liu, Y. | Guo, X. W. | Liao, X. | Liu, L. L. | Wang, Q. | Li, T. H.	Department of Fruit Science, College of Agriculture and Biotechnology, China Agricultural University, 2 Yuanmingyuan West Road, Haidian District, Beijing 100193, People's Republic of China.	Identification and characterization of FaSOC1, a homolog of SUPPRESSOR OF OVEREXPRESSION OF CONSTANS1 from strawberry	Identification and characterization of FaSOC1, a homolog of SUPPRESSOR OF OVEREXPRESSION OF CONSTANS1 from strawberry	2013	Amino Acid Sequence	A MADS-box gene SUPPRESSOR OF OVEREXPRESSION OF CONSTANS1 (SOC1) integrates multiple flowering signals to regulate floral transition in Arabidopsis. Strawberry (Fragaria spp.) is an economically important fruit crop, but its molecular control of flowering is largely unknown. In this study, a SOC1-like gene, FaSOC1, was isolated and characterized from strawberry. The open reading frame of FaSOC1 w…	FaSOC1 localized in the cytoplasm and showed no transcriptional activation activity . expression increased during the first 2 weeks of short-day treatment, but declined dramatically during three to 4 weeks . phylogenetic analysis showed the protein contained a highly conserved MADS domain and a SOC1 motif .	Gene	531	2	158-67	1879-0038 (Electronic)	10.1016/j.gene.2013.09.036	https://www.ncbi.nlm.nih.gov/pubmed/24055423
Lei, J. | You, Y. | Dai, P. | Yu, L. | Li, Y. | Liu, C. | Liu, X.	College of Agronomy, Xinjiang Agricultural University, Nongda East Road, Urumqi 830052, China.	GhAGL16 (AGAMOUS-LIKE16) Negatively Regulates Tolerance to Water Deficit in Transgenic Arabidopsis and Cotton	GhAGL16 (AGAMOUS-LIKE16) Negatively Regulates Tolerance to Water Deficit in Transgenic Arabidopsis and Cotton	2024	ABA signaling	Cotton is one of the most economically important crops in the world, and drought is a key abiotic factor that can significantly reduce cotton yield. MADS-box transcription factors play essential roles in various aspects of plant growth and development as well as responses to biotic and abiotic stress. However, the use of MADS-box transcription factors to regulate water stress responses has not be…	cotton is one of the most economically important crops in the world . drought is a key abiotic factor that can significantly reduce cotton yield . the use of MADS-box transcription factors to regulate water stress responses has not been fully explored in cotton .	Plants (Basel)	13	2		2223-7747 (Print)	10.3390/plants13020282	https://www.ncbi.nlm.nih.gov/pubmed/38256835
Leite Montalvao, A. P. | Kersten, B. | Kim, G. | Fladung, M. | Muller, N. A.	Thunen Institute of Forest Genetics, Sieker Landstrasse 2, 22927 Grosshansdorf, Germany.	ARR17 controls dioecy in Populus by repressing B-class MADS-box gene expression	ARR17 controls dioecy in Populus by repressing B-class MADS-box gene expression	2022	Flowers/genetics	The number of dioecious species for which the genetic basis of sex determination has been resolved is rapidly increasing. Nevertheless, the molecular mechanisms downstream of the sex determinants remain largely elusive. Here, by RNA-sequencing early-flowering isogenic aspen (Populus tremula) lines differing exclusively for the sex switch gene ARR17, we show that a narrowly defined genetic network…	a narrowly defined genetic network controls differential development of female and male flowers . clustered regularly interspaced short palindromic repeats (CRISPR)-Cas9-mediated arr17 knockout only affected the expression of a strikingly small number of genes . this suggests a specific role in the regulation of floral development rather than a generic function in hormone signalling .	Philos Trans R Soc Lond B Biol Sci	377	1850	20210217	1471-2970 (Electronic)	10.1098/rstb.2021.0217	https://www.ncbi.nlm.nih.gov/pubmed/35306887
Li, C. | Chen, L. | Fan, X. | Qi, W. | Ma, J. | Tian, T. | Zhou, T. | Ma, L. | Chen, F.	Key Laboratory of Three Gorges Regional Plant Genetics & Germplasm Enhancement (CTGU) , Biotechnology Research Center, China Three Gorges University, Yichang 443000, P.R. China.	MawuAP1 promotes flowering and fruit development in the basal angiosperm Magnolia wufengensis (Magnoliaceae)	MawuAP1 promotes flowering and fruit development in the basal angiosperm Magnolia wufengensis (Magnoliaceae)	2020	Flowers/genetics	The APETALA1/SQUAMOSA (AP1/SQUA) -like genes of flowering plants play crucial roles in the development processes of floral meristems, sepals, petals and fruits. Although many of the AP1/SQUA-like genes have been characterized in angiosperms, few have been identified in basal angiosperm taxa. Therefore, the functional evolution of the AP1/SQUA subfamily is still unclear. We characterized an AP1 ho…	the functional evolution of the AP1/SQUA subfamily is still unclear . we characterized an AP1 homolog, MawuAP1, from Magnolia wufengensis . it was highly expressed in vegetative and floral organs, especially in flower bud development .	Tree Physiol	40	9	1247-1259	1758-4469 (Electronic)	10.1093/treephys/tpaa057	https://www.ncbi.nlm.nih.gov/pubmed/32348527
Li, C. | Lei, C. | Wang, K. | Tan, M. | Xu, F. | Wang, J. | Zheng, Y.	College of Food Science and Technology, Nanjing Agricultural University, Nanjing 210095 Jiangsu, P.R. China.	MADS2 regulates priming defence in postharvest peach (Prunus persica) through combined salicylic acid and abscisic acid signaling	MADS2 regulates priming defence in postharvest peach (Prunus persica) through combined salicylic acid and abscisic acid signaling	2022	Abscisic Acid/pharmacology	MADS-box genes play well-documented roles in plant development, but relatively little is known regarding their involvement in defence responses. In this study, pre-treatment of peach (Prunus persica) (Prunus persica) fruit with beta-aminobutyric acid (BABA) activated resistance against Rhizopus stolonifer, leading to a significant delay in the symptomatic appearance of disease. This was associate…	pre-treatment of peach fruit with -aminobutyric acid (BABA) activated resistance . defence response included a H2O2burst, ABA accumulation, and callose deposition . nucleus-localized MADS2 as an interacting partner with NPR1 .	J Exp Bot	73	11	3787-3806	1460-2431 (Electronic)	10.1093/jxb/erac099	https://www.ncbi.nlm.nih.gov/pubmed/35266534
Li, C. | Lin, H. | Chen, A. | Lau, M. | Jernstedt, J. | Dubcovsky, J.	Department of Plant Sciences, University of California, Davis, CA 95616, USA.	Wheat VRN1, FUL2 and FUL3 play critical and redundant roles in spikelet development and spike determinacy	Wheat VRN1, FUL2 and FUL3 play critical and redundant roles in spikelet development and spike determinacy	2019	Flowers/genetics/growth & development	The spikelet is the basic unit of the grass inflorescence. In this study, we show that wheat MADS-box genes VRN1, FUL2 and FUL3 play critical and redundant roles in spikelet and spike development, and also affect flowering time and plant height. In the vrn1ful2ful3-null triple mutant, the inflorescence meristem formed a normal double-ridge structure, but then the lateral meristems generated veget…	spikelet is the basic unit of the grass inflorescence . wheat MADS-box genes VRN1, FUL2 and FUL3 play critical roles in spikelet and spike development . results suggest an essential role of these three genes in fate of upper spikelet ridge .	Development	146	14		1477-9129 (Electronic)	10.1242/dev.175398	https://www.ncbi.nlm.nih.gov/pubmed/31337701
Li, D. | Fu, X. | Guo, L. | Huang, Z. | Li, Y. | Liu, Y. | He, Z. | Cao, X. | Ma, X. | Zhao, M. | Zhu, G. | Xiao, L. | Wang, H. | Chen, X. | Liu, R. | Liu, X.	State Key Laboratory of Plant Cell and Chromosome Engineering, Center for Agricultural Resources Research, Institute of Genetics and Developmental Biology, Chinese Academy of Sciences, Shijiazhuang 050021, China; Hebei Collaboration Innovation Center for Cell Signaling, College of Life Sciences, Hebei Normal University, Shijiazhuang 050024, China; School of Life Sciences, Lanzhou University, Lanz…	FAR-RED ELONGATED HYPOCOTYL3 activates SEPALLATA2 but inhibits CLAVATA3 to regulate meristem determinacy and maintenance in Arabidopsis	FAR-RED ELONGATED HYPOCOTYL3 activates SEPALLATA2 but inhibits CLAVATA3 to regulate meristem determinacy and maintenance in Arabidopsis	2016	Arabidopsis/*growth & development	Plant meristems are responsible for the generation of all plant tissues and organs. Here we show that the transcription factor (TF) FAR-RED ELONGATED HYPOCOTYL3 (FHY3) plays an important role in both floral meristem (FM) determinacy and shoot apical meristem maintenance in Arabidopsis, in addition to its well-known multifaceted roles in plant growth and development during the vegetative stage. Th…	the transcription factor (TF) FAR-RED ELONGATED HYPOCOTYL3 plays an important role in floral meristem (FM) determinacy . a single TF may vary in different organs and developmental stages .	Proc Natl Acad Sci U S A	113	33	9375-80	1091-6490 (Electronic)	10.1073/pnas.1602960113	https://www.ncbi.nlm.nih.gov/pubmed/27469166
Li, D. | Shao, L. | Zhang, J. | Wang, X. | Zhang, D. | Horvath, D. P. | Zhang, L. | Zhang, J. | Xia, Y.	Genomics and Genetic Engineering Laboratory of Ornamental Plants, College of Agriculture and Biotechnology, Zhejiang University, Hangzhou, 310058, China.	MADS-box transcription factors determine the duration of temporary winter dormancy in closely related evergreen and deciduous Iris spp	MADS-box transcription factors determine the duration of temporary winter dormancy in closely related evergreen and deciduous Iris spp	2022	Flowers	Winter dormancy (WD) is a crucial strategy for plants coping with potentially deadly environments. In recent decades, this process has been extensively studied in economically important perennial eudicots due to changing climate. However, in evergreen monocots with no chilling requirements, dormancy processes are so far a mystery. In this study, we compared the WD process in closely related everg…	winter dormancy (WD) is a crucial strategy for plants coping with potentially deadly environments . in recent decades, this process has been extensively studied in perennial eudicots due to changing climate . but in evergreen monocots with no chilling requirements, WD processes are so far a mystery .	J Exp Bot	73	5	1429-1449	1460-2431 (Electronic)	10.1093/jxb/erab484	https://www.ncbi.nlm.nih.gov/pubmed/34752617
Li, F. | Chen, X. | Zhou, S. | Xie, Q. | Wang, Y. | Xiang, X. | Hu, Z. | Chen, G.	Laboratory of molecular biology of tomato, Bioengineering College, Chongqing University, Chongqing, PR China. Electronic address: lffbhh@163.com.	Overexpression of SlMBP22 in Tomato Affects Plant Growth and Enhances Tolerance to Drought Stress	Overexpression of SlMBP22 in Tomato Affects Plant Growth and Enhances Tolerance to Drought Stress	2020	Chlorophyll/metabolism	MADS-box transcription factors play crucial and diverse roles in plant growth and development, and the responses to biotic and abiotic stresses. However, the implementation of MADS-box transcription factors in regulating plant architecture and stress responses has not been fully explored in tomato. Here, we found that a novel MADS-box transcription factor, SlMBP22, participated in the control of …	SlMBP22 overexpression lines exhibit dwarfism with smaller leaf in tomato . overexpression promotes chlorophyll accumulation and affects sugar metabolism . a novel MADS-box transcription factor plays an important role in tomato growth .	Plant Sci	301		110672	1873-2259 (Electronic)	10.1016/j.plantsci.2020.110672	https://www.ncbi.nlm.nih.gov/pubmed/33218637
[truncated: 453 more rows]
