# Supplementary material for: Functional Overview on Mads Box: A Meta-Review
Source: Preprints.org preprint supplement (doi:10.20944/preprints202405.1691.v1), 2024-05-27
Supplement: Supplementary file 2 [file supplementary › Table S1_MADS-box study associations.xlsx]

## Sheet: Sheet1
Table S1: MADS box member genes along with their respective study-association hit counts on the used local reference database
SN	Annotated IDs (used in current study)	AGIs	Study associations	Additional IDs	Phylogenetic association	MADS Type	Total studied members
1	AT1G29960	AT1G29960	-		M alpha	Type-I	15	<= Type-I
2	AGL100	AT1G17310	-	AGAMOUS-LIKE 100	M alpha	Type-I
3	AGL102	AT1G47760	-	AGAMOUS-LIKE 102	M alpha	Type-I
4	AGL23	AT1G65360	2	AGAMOUS-LIKE 23	M alpha	Type-I
5	AGL28	AT1G01530	1	AGAMOUS-LIKE 28	M alpha	Type-I
6	AGL29	AT2G34440	-	AGAMOUS-LIKE 29	M alpha	Type-I
7	AGL39	AT5G27130	-	AGAMOUS-LIKE 39	M alpha	Type-I
8	AGL40	AT4G36590	1	AGAMOUS-LIKE 40	M alpha	Type-I
9	AGL55	AT1G60920	-	AGAMOUS-LIKE 55	M alpha	Type-I
10	AGL57	AT3G04100	-	AGAMOUS-LIKE 57	M alpha	Type-I
11	AGL58	AT1G28450	-	AGAMOUS-LIKE 58	M alpha	Type-I
12	AGL59	AT1G28460	-	AGAMOUS-LIKE 59	M alpha	Type-I
13	AGL60	AT1G72350	-	AGAMOUS-LIKE 60	M alpha	Type-I
14	DIA	AT2G24840	2	AGL61, DIANA, AGAMOUS-LIKE 61	M alpha	Type-I
15	AGL62	AT5G60440	8	AGAMOUS-LIKE 62	M alpha	Type-I
16	AGL64	AT1G29962	-	AGAMOUS-LIKE 64	M alpha	Type-I
17	AGL73	AT5G38620	-	AGAMOUS-LIKE 73	M alpha	Type-I
18	AGL74	AT1G48150	-	AGAMOUS-LIKE 74	M alpha	Type-I
19	AGL83	AT5G49490	-	AGAMOUS-LIKE 83	M alpha	Type-I
20	AGL84	AT5G49420	-	AGAMOUS-LIKE 84	M alpha	Type-I
21	AGL85	AT1G54760	-	AGAMOUS-LIKE 85	M alpha	Type-I
22	AGL88	AT2G11990	-	AGAMOUS-LIKE 88	M alpha	Type-I
23	AGL91	AT3G66656	1	AGAMOUS-LIKE 91	M alpha	Type-I
24	AGL97	AT1G46408	-	AGAMOUS-LIKE 97	M alpha	Type-I
25	AGL99	AT5G04640	-	AGAMOUS-LIKE 99	M alpha	Type-I
26	AGL56	AT1G60880	1	AGAMOUS-LIKE-56	M alpha	Type-I
27	AGL101	AT5G27050	-	AGAMOUS-LIKE 101	M beta	Type-I
28	AGL103	AT3G18650	-	AGAMOUS-LIKE 103	M beta	Type-I
29	AGL105	AT5G37415	-	AGAMOUS-LIKE 105	M beta	Type-I
30	AGL26	AT5G26880	1	AGAMOUS-LIKE 26	M beta	Type-I
31	AGL43	AT5G40220	-	AGAMOUS-LIKE 43	M beta	Type-I
32	AGL47	AT5G55690	-	AGAMOUS-LIKE 47	M beta	Type-I
33	AGL49	AT1G60040	-	AGAMOUS-LIKE 49	M beta	Type-I
34	AGL50	AT1G59810	1	AGAMOUS-LIKE 50	M beta	Type-I
35	AGL51	AT4G02235	-	AGAMOUS-LIKE 51	M beta	Type-I
36	AGL52	AT4G11250	-	AGAMOUS-LIKE 52	M beta	Type-I
37	AGL53	AT5G27070	-	AGAMOUS-LIKE 53	M beta	Type-I
38	AGL54	AT5G27090	-	AGAMOUS-LIKE 54	M beta	Type-I
39	AGL75	AT5G41200	-	AGAMOUS-LIKE 75	M beta	Type-I
40	AGL76	AT5G40120	-	AGAMOUS-LIKE 76	M beta	Type-I
41	AGL77	AT5G38740	-	AGAMOUS-LIKE 77	M beta	Type-I
42	AGL78	AT5G65330	-	AGAMOUS-LIKE 78	M beta	Type-I
43	AGL81	AT5G39750	-	EMB3008, AGAMOUS-LIKE 81	M beta	Type-I
44	AGL82	AT5G58890	-	AGAMOUS-LIKE 82	M beta	Type-I
45	AGL89	AT5G27580	-	AGAMOUS-LIKE 89	M beta	Type-I
46	AGL93	AT5G26950	-	AGAMOUS-LIKE 93	M beta	Type-I
47	AGL98	AT5G39810	-	AGAMOUS-LIKE 98	M beta	Type-I
54	AT5G27810	AT5G27810	-		M gamma	Type-I
55	AGL35	AT5G26630	1	AGAMOUS-LIKE 35	M gamma	Type-I
56	AGL36	AT5G26650	1	AGAMOUS-LIKE 36	M gamma	Type-I
57	PHE2	AT1G65300	-	AGL38, PHERES2, AGAMOUS-LIKE 38	M gamma	Type-I
58	AGL41	AT2G26880	-	AGAMOUS-LIKE 41	M gamma	Type-I
59	AGL45	AT3G05860	-	AGAMOUS-LIKE 45	M gamma	Type-I
60	AGL46	AT2G28700	-	AGAMOUS-LIKE 46	M gamma	Type-I
61	AGL48	AT2G40210	-	AGAMOUS-LIKE 48	M gamma	Type-I
62	FEM111	AT5G48670	2	AGL80, AGAMOUS-LIKE 80	M gamma	Type-I
63	AGL86	AT1G31630	-	AGAMOUS-LIKE 86	M gamma	Type-I
64	AGL87	AT1G22590	-	AGAMOUS-LIKE 87	M gamma	Type-I
65	AGL90	AT5G27960	1	AGAMOUS-LIKE 90	M gamma	Type-I
66	AGL92	AT1G31640	-	AGAMOUS-LIKE 92	M gamma	Type-I
67	AGL95	AT2G15660	-	AGAMOUS-LIKE 95	M gamma	Type-I
68	AGL96	AT5G06500	-	AGAMOUS-LIKE 96	M gamma	Type-I
69	AGL34	AT5G26580	1	AGAMOUS-LIKE-34	M gamma	Type-I
70	PHE1	AT1G65330	5	PHERES1, AGL37, AGAMOUS-LIKE 37	M gamma	Type-I
71	AT1G33070	AT1G33070	-		M gamma	Type-I
72	AGL33	AT2G26320	-	AGAMOUS-LIKE 33	MIKC*-S	Type-II	41	<= Type-II
73	AGL104	AT1G22130	1	AGAMOUS-LIKE 104	M delta; MIKC*-S	Type-II
74	AGL30	AT2G03060	-	AGAMOUS-LIKE 30	M delta; MIKC*-P	Type-II
75	AGL65	AT1G18750	-	AGAMOUS-LIKE 65	M delta; MIKC*-P	Type-II
76	AGL66	AT1G77980	1	AGAMOUS-LIKE 66	M delta; MIKC*-S	Type-II
77	AGL67	AT1G77950	-	AGAMOUS-LIKE 67	M delta; MIKC*-S	Type-II
78	AGL94	AT1G69540	-	AGAMOUS-LIKE 94	M delta; MIKC*-P	Type-II
79	AG	AT4G18960	48		MIKCc	Type-II
80	XAL1	AT1G71692	15	AGL12, XAANTAL1, AGAMOUS-LIKE 12	MIKCc	Type-II
81	AGL13	AT3G61120	4	AGAMOUS-LIKE 13	MIKCc	Type-II
82	XAL2	AT4G11880	6	AGL14, XAANTAL2, AGAMOUS-LIKE 14	MIKCc	Type-II
83	AGL15	AT5G13790	26	AGAMOUS-LIKE 15	MIKCc	Type-II
84	AGL16	AT3G57230	9	AGAMOUS-LIKE 16	MIKCc	Type-II
85	AGL17	AT2G22630	17	AGAMOUS-LIKE 17	MIKCc	Type-II
86	AGL18	AT3G57390	7	AGAMOUS-LIKE 18	MIKCc	Type-II
87	AGL19	AT4G22950	9	GL19, AGAMOUS-LIKE 19	MIKCc	Type-II
88	SOC1	AT2G45660	54	AGL20, ATSOC1, AGAMOUS-LIKE 20	MIKCc	Type-II
89	AGL21	AT4G37940	10	AGAMOUS-LIKE 21	MIKCc	Type-II
90	AGL24	AT4G24540	27	AGAMOUS-LIKE 24	MIKCc	Type-II
91	MAF2	AT5G65050	9	AGL31, MAF2I, AGAMOUS-LIKE 31	MIKCc	Type-II
92	FYF	AT5G62165	9	AGL42, AGAMOUS-LIKE 42	MIKCc	Type-II
93	ANR1	AT2G14210	16	AGL44, AGAMOUS-LIKE 44	MIKCc	Type-II
94	AGL6	AT2G45650	33	RSB1, AGAMOUS-LIKE 6	MIKCc	Type-II
95	FYL1	AT5G51870	1	AGL71, AGAMOUS-LIKE 71	MIKCc	Type-II
96	FYL2	AT5G51860	1	AGL72, AGAMOUS-LIKE 72	MIKCc	Type-II
97	AGL79	AT3G30260	5	AGAMOUS-LIKE 79	MIKCc	Type-II
98	FUL	AT5G60910	47	AGL8, FRUITFUL, AGAMOUS-LIKE 8	MIKCc	Type-II
99	AP3	AT3G54340	39	ATAP3, APETALA3	MIKCc	Type-II
100	AP1	AT1G69120	70	ATTAP1, AGL7, APETALA1	MIKCc	Type-II
101	CAL	AT1G26310	4	AGL10, CAULIFLOWER, AGAMOUS-LIKE 10	MIKCc	Type-II
102	FLC	AT5G10140	52	FLF, AGL25, RSB6	MIKCc	Type-II
103	GOA	AT1G31140	5	AGL63, AGAMOUS-LIKE 63	MIKCc	Type-II
104	MAF3	AT5G65060	7	AGL70, FCL3, AGAMOUS-LIKE 70	MIKCc	Type-II
105	MAF4	AT5G65070	10	AGL69, FCL4, MAF4I	MIKCc	Type-II
106	MAF5	AT5G65080	9	AGL68, MAF5I, AGAMOUS-LIKE 68	MIKCc	Type-II
107	PI	AT5G20240	31	PISTILLATA	MIKCc	Type-II
108	STK	AT4G09960	27	AGL11, AGAMOUS-LIKE 11	MIKCc	Type-II
109	SEP2	AT3G02310	12	AGL4, AGAMOUS-LIKE 4	MIKCc	Type-II
110	SEP4	AT2G03710	6	AGL3, AGAMOUS-LIKE 3	MIKCc	Type-II
111	SEP1	AT5G15800	30	AGL2, AGAMOUS-LIKE 2	MIKCc	Type-II
112	SEP3	AT1G24260	37	AGL9, AGAMOUS-LIKE 9	MIKCc	Type-II
113	SHP1	AT3G58780	13	AGL1, AGAMOUS-LIKE 1	MIKCc	Type-II
114	SHP2	AT2G42830	15	AGL5, AGAMOUS-LIKE 5	MIKCc	Type-II
115	SVP	AT2G22540	76	AGL22, FAQ1, AGAMOUS-LIKE 22	MIKCc	Type-II
116	TT16	AT5G23260	11	ABS, AGL32, AGAMOUS-LIKE 32	MIKCc	Type-II
117	MAF1	AT1G77080	14	AGL27, FLM, AGAMOUS-LIKE 27	MIKCc	Type-II
Cumulative study associations			852
